# Supplementary material for: Experimental and mechanistic insights into copper(ii)–dioxygen catalyzed oxidative N-dealkylation of N-(2-pyridylmethyl)phenylamine and its derivatives
Source: Royal Society of Chemistry journal article supplement (doi:10.1039/c7ob02192e), 2017-01-01

## Supporting Information

---

### **Experimental and Mechanistic Insights of Copper(II)-dioxygen Catalyzed Oxidative *N*-dealkylation of *N*-(2-pyridylmethyl)phenylamine and Its Derivatives**

Yang Wang, Haixiong Liu, Xiaofeng Zhang, Zilong Zhang and Deguang Huang\*

State Key Laboratory of Structural Chemistry, Fujian Institute of Research on the Structure of  
Matter, Chinese Academy of Sciences, Fuzhou, Fujian 350002, China

\*To whom correspondence should be addressed. E-mail: dhuang@fjirsm.ac.cn

|                                                                   |         |
|-------------------------------------------------------------------|---------|
| 1. Crystallographic data and X-ray structures of compounds.....   | S2      |
| 2. General information.....                                       | S3      |
| 3. Experimental procedure for inorganic compounds .....           | S3-S5   |
| 4. General experimental procedure A-E for organic synthesis ..... | S5-S17  |
| 5. References.....                                                | S17     |
| 6. NMR and Mass spectra.....                                      | S18-S54 |

**Table S1.** Crystallographic Data<sup>a</sup> for Compounds **1a-1b** and **1d-1f**.

| compounds                                                                                                      | [1a]                                                                                          | [1b]                                                                             | [1d]                                                                                          | [1e]                                                                                          | [1f]                                                                                          |
|----------------------------------------------------------------------------------------------------------------|-----------------------------------------------------------------------------------------------|----------------------------------------------------------------------------------|-----------------------------------------------------------------------------------------------|-----------------------------------------------------------------------------------------------|-----------------------------------------------------------------------------------------------|
| formula                                                                                                        | C <sub>20</sub> H <sub>19</sub> CuF <sub>6</sub> N <sub>3</sub> O <sub>7</sub> S <sub>2</sub> | C <sub>25</sub> H <sub>21</sub> CuF <sub>3</sub> N <sub>4</sub> O <sub>5</sub> S | C <sub>28</sub> H <sub>30</sub> CuF <sub>6</sub> N <sub>6</sub> O <sub>6</sub> S <sub>2</sub> | C <sub>27</sub> H <sub>27</sub> CuF <sub>6</sub> N <sub>5</sub> O <sub>6</sub> S <sub>2</sub> | C <sub>33</sub> H <sub>31</sub> CuF <sub>6</sub> N <sub>5</sub> O <sub>6</sub> S <sub>2</sub> |
| <i>M</i>                                                                                                       | 655.04                                                                                        | 610.06                                                                           | 788.24                                                                                        | 759.20                                                                                        | 835.29                                                                                        |
| crystal system                                                                                                 | orthorhombic                                                                                  | monoclinic                                                                       | triclinic                                                                                     | triclinic                                                                                     | triclinic                                                                                     |
| space group                                                                                                    | <i>P</i> 2 <sub>1</sub> 2 <sub>1</sub> 2 <sub>1</sub>                                         | <i>P</i> 2 <sub>1</sub> / <i>n</i>                                               | <i>P</i> -1                                                                                   | <i>P</i> -1                                                                                   | <i>P</i> -1                                                                                   |
| <i>a</i> , Å                                                                                                   | 8.68300(16)                                                                                   | 13.4993(3)                                                                       | 10.1705(4)                                                                                    | 8.9816(4)                                                                                     | 10.0986(12)                                                                                   |
| <i>b</i> , Å                                                                                                   | 10.2079(2)                                                                                    | 8.9437(2)                                                                        | 12.0872(4)                                                                                    | 10.9461(4)                                                                                    | 13.5819(14)                                                                                   |
| <i>c</i> , Å                                                                                                   | 27.0713(6)                                                                                    | 20.9454(5)                                                                       | 14.4087(6)                                                                                    | 16.4679(9)                                                                                    | 15.2704(16)                                                                                   |
| $\alpha$ , deg                                                                                                 | 90                                                                                            | 90                                                                               | 93.643(3)                                                                                     | 81.550(4)                                                                                     | 68.475(10)                                                                                    |
| $\beta$ , deg                                                                                                  | 90                                                                                            | 100.521(2)                                                                       | 110.216(4)                                                                                    | 77.177(4)                                                                                     | 72.790(10)                                                                                    |
| $\gamma$ , deg                                                                                                 | 90                                                                                            | 90                                                                               | 95.074(3)                                                                                     | 87.632(3)                                                                                     | 73.322(10)                                                                                    |
| <i>V</i> , Å <sup>3</sup>                                                                                      | 2399.47(8)                                                                                    | 2486.30(11)                                                                      | 1647.25(11)                                                                                   | 1561.44(13)                                                                                   | 1823.2(3)                                                                                     |
| <i>Z</i>                                                                                                       | 4                                                                                             | 4                                                                                | 2                                                                                             | 2                                                                                             | 2                                                                                             |
| $\mu$ , mm <sup>-1</sup>                                                                                       | 3.810                                                                                         | 2.640                                                                            | 2.889                                                                                         | 3.014                                                                                         | 2.641                                                                                         |
| independent data                                                                                               | 3815                                                                                          | 4745                                                                             | 6209                                                                                          | 5951                                                                                          | 6796                                                                                          |
| refined parameters                                                                                             | 358                                                                                           | 352                                                                              | 442                                                                                           | 427                                                                                           | 591                                                                                           |
| <i>R</i> <sub>1</sub> <sup>b</sup> , <i>wR</i> <sub>2</sub> <sup>c</sup> ( <i>I</i> > 2 $\sigma$ ( <i>I</i> )) | 0.0232, 0.0589                                                                                | 0.0477, 0.1274                                                                   | 0.0581, 0.1854                                                                                | 0.0433, 0.1125                                                                                | 0.1146, 0.3084                                                                                |
| <i>R</i> <sub>1</sub> , <i>wR</i> <sub>2</sub> (all data)                                                      | 0.0251, 0.0602                                                                                | 0.0609, 0.1360                                                                   | 0.0629, 0.1872                                                                                | 0.0521, 0.1168                                                                                | 0.1586, 0.3220                                                                                |

<sup>a</sup>*T* = 100(2) K, Cu K $\alpha$  radiation ( $\lambda$  = 1.54184 Å). <sup>b</sup>*R*<sub>1</sub> =  $\sum||F_o| - |F_c|| / \sum|F_o|$ . <sup>c</sup>*wR*<sub>2</sub> =  $\{\sum[w(F_o^2 - F_c^2)^2 / (F_o^2)]\}^{1/2}$ .

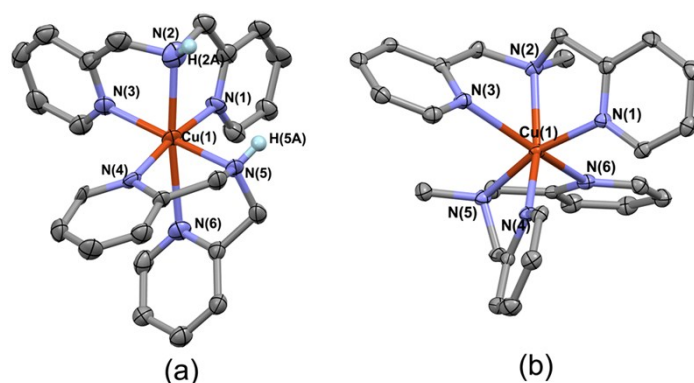**Figure S1** Crystal structures of **1c** (a) (Note: CIF file was NOT reported due to poor data; Structure was shown for comparison) and **1d** (b) (CCDC 1561119) showing 50% probability ellipsoid.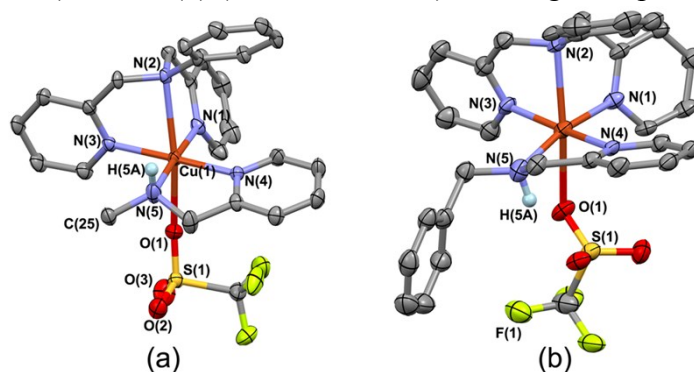**Figure S2** Crystal structures of complexes **1e** (a) (CCDC 1560850) and **1f** (b) (CCDC 1560839) showing 50% probability ellipsoid. These two structures are presented here for representation of the structure of {Cu<sup>II</sup>(L<sub>N</sub>)[(PyCH<sub>2</sub>)NH(PhCH<sub>3</sub>)]} moiety from the point of analogues.

## 1. General Information

All chemicals were purchased from commercial suppliers and used without further purification. Solvent DMF and CH<sub>3</sub>CN were dried over CaH<sub>2</sub> and stored in the presence of activated molecular sieve. Flash chromatography was performed on silica gel (200-300 mesh). The single crystal data of compounds were collected by a Cu-K $\alpha$  rotating anode source at 100 K, using a Supernova diffractometer with the  $\omega$ -scan method. ESI-MS were obtained using a Bruker Impact II quadrupole time-of-flight mass spectrometer. <sup>1</sup>H NMR spectra were recorded on Bruker Avance III (400 MHz) and chemical shifts are expressed in  $\delta$  ppm values with reference to tetramethylsilane (TMS) as internal standard. NMR multiplicities are abbreviated as follows: s = singlet, d = doublet, m = multiplet. Coupling constants (J) are expressed in Hz. Product yields refer to isolated yields after column chromatography. All commercial reagents were purchased from Alfa, Sigma Aldrich, Energy Chemical or TCI.

## 2. Experimental procedure for inorganic compounds

### (1) [Cu<sup>II</sup>(L<sub>N</sub>)(H<sub>2</sub>O)(OTf)](OTf) (1a)

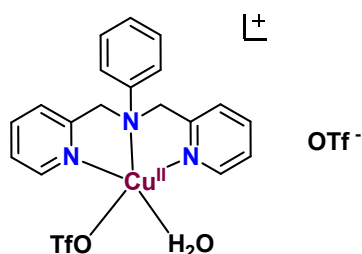

To a solution of Cu(OTf)<sub>2</sub> (18 mg, 0.05 mmol) and H<sub>2</sub>O (0.1 mL) in MeCN (3 mL) was added a solution of *N,N*-bis(pyridin-2-ylmethyl)aniline (13.7 mg, 0.05 mmol) in MeCN (2 mL). The mixture was stirred for 5h under nitrogen atmosphere and concentrated under reduced pressure. The residue was washed with Et<sub>2</sub>O and THF, dissolved in MeCN and diffused with Et<sub>2</sub>O to yield the product as some green crystals (26.1mg, 80%). Anal. Calcd. (%) for C<sub>20</sub>H<sub>19</sub>CuF<sub>6</sub>N<sub>3</sub>O<sub>7</sub>S<sub>2</sub>: C, 36.67; H, 2.92; N, 6.41. Found (%) C, 36.45; H, 3.19; 6.73.

### (2) {[Cu<sup>II</sup>(L<sub>N</sub>)(PyCOO)](OTf)}<sub>n</sub> (1b)

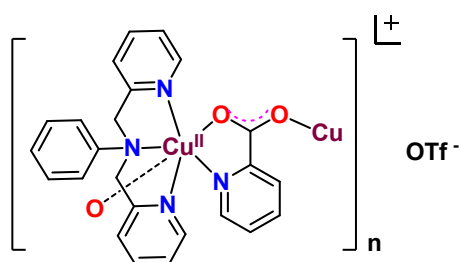

**Method A:** To a solution of compound **1a** (32.6 mg, 0.05 mmol) in MeCN/H<sub>2</sub>O (5/0.1 mL) was added *N*-(pyridin-2-ylmethyl)aniline (9.2 mg, 0.05 mmol) and Et<sub>3</sub>N (0.1 mL). The mixture was stirred overnight under O<sub>2</sub> atmosphere for 24 h and concentrated under reduced pressure. The residue was washed with Et<sub>2</sub>O, dissolved in THF and diffused with Et<sub>2</sub>O to yield the product as green crystals (16 mg, 53%). Anal. Calcd. (%) for C<sub>25</sub>H<sub>21</sub>CuF<sub>3</sub>N<sub>4</sub>O<sub>5</sub>S: C, 49.22; H, 3.47; N, 9.18. Found (%) C, 48.86; H, 3.09; N, 9.87. ESI-MS (MeCN): *m/z* 460.3 for [Cu(DPA-Ph)(PyCOO)]<sup>+</sup>.

**Method B:** A mixture of *N,N*-bis(pyridin-2-ylmethyl)aniline (13.7 mg, 0.05 mmol) and Cu(OTf)<sub>2</sub> (18 mg, 0.05 mmol) were stirred in MeCN/H<sub>2</sub>O (5/0.1 mL) for 1 h before *N*-(pyridin-2-ylmethyl)-

aniline (9.2 mg, 0.05 mmol) and Et<sub>3</sub>N (0.1 mL) were added. The mixture was stirred in O<sub>2</sub> atmosphere for 24 h and solvent removed in vacuo. The residue was washed with Et<sub>2</sub>O, dissolved in THF and diffused with Et<sub>2</sub>O to afford the product as green crystals (15 mg, 50%).

**(3) [Cu<sup>II</sup>(DPA)<sub>2</sub>](CF<sub>3</sub>SO<sub>3</sub>)<sub>2</sub> (1c)**

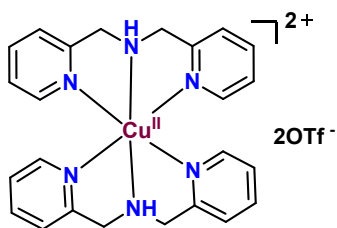

To a solution of compound **1a** (32.6mg, 0.05mmol) in MeCN (5 mL) was added di-(2-picolyl)amine (DPA) (10 mg, 0.05 mmol) and Et<sub>3</sub>N (0.1 mL). The mixture was stirred overnight under O<sub>2</sub> atmosphere for 24h and concentrated under reduced pressure. The residue was washed with Et<sub>2</sub>O and THF, dissolved in CH<sub>3</sub>CN and diffused with Et<sub>2</sub>O to yield the product as blue crystals (7.4 mg, 32%). Anal. Calcd. (%) for C<sub>30</sub>H<sub>34</sub>CuF<sub>6</sub>N<sub>6</sub>O<sub>6</sub>S<sub>2</sub>: C, 44.14; H, 4.20; N, 10.30. Found (%) C, 43.98; H, 4.51; 10.02

**(4) [Cu<sup>II</sup>(DPA-CH<sub>3</sub>)<sub>2</sub>](CF<sub>3</sub>SO<sub>3</sub>)<sub>2</sub> (1d)**

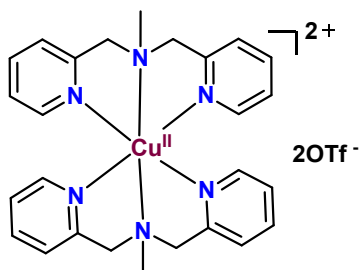

To a solution of compound **1a** (25 mg, 0.05 mmol) in MeCN (5 mL) was added N-methyl-N,N-di(2-pyridylmethyl)amine (DPA-CH<sub>3</sub>) (11 mg, 0.05 mmol) and Et<sub>3</sub>N (0.1 mL). The mixture was stirred overnight under O<sub>2</sub> atmosphere for 24h and concentrated under reduced pressure. The residue was washed with Et<sub>2</sub>O and THF, dissolved in CH<sub>3</sub>CN and diffused with Et<sub>2</sub>O to yield the product as blue crystals (6.1 mg, 25%). Anal. Calcd. (%) for C<sub>28</sub>H<sub>30</sub>CuF<sub>6</sub>N<sub>6</sub>O<sub>6</sub>S<sub>2</sub>: C, 42.66; H, 3.84; N, 10.66. Found (%) C, 43.23; H, 3.21; 10.12.

**(5) [Cu<sup>II</sup>(L<sub>N</sub>)(PyCH<sub>2</sub>NHCH<sub>3</sub>)(CF<sub>3</sub>SO<sub>3</sub>)](CF<sub>3</sub>SO<sub>3</sub>) (1e)**

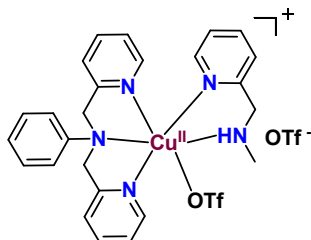

To a solution of compound **1a** (32.6 mg, 0.05 mmol) in MeCN (5 mL) was added N-methyl-1-(pyridin-2-yl)methanamine (6.2 mg, 0.05 mmol) and Et<sub>3</sub>N (0.1 mL). The mixture was stirred overnight under O<sub>2</sub> atmosphere for 24h and concentrated under reduced pressure. The residue was washed with Et<sub>2</sub>O, dissolved in THF and diffused with Et<sub>2</sub>O to yield the product as blue crystals (28.5 mg, 75%). Anal. Calcd. (%) for C<sub>27</sub>H<sub>27</sub>CuF<sub>6</sub>N<sub>5</sub>O<sub>6</sub>S<sub>2</sub>: C, 42.71; H, 3.58; N, 9.22. Found (%) C, 42.36; H, 3.12; 9.79.

**(6) [Cu<sup>II</sup>(L<sub>N</sub>)(PyCH<sub>2</sub>NHCH<sub>2</sub>Ph)(CF<sub>3</sub>SO<sub>3</sub>)](CF<sub>3</sub>SO<sub>3</sub>) (1f)**

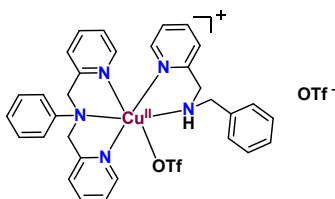

To a solution of compound **1a** (32.6 mg, 0.05 mmol) in MeCN (5 mL) was added *N*-benzyl-1-(pyridin-2-yl)methanamine (9.9 mg, 0.05 mmol) and Et<sub>3</sub>N (0.1 mL). The mixture was stirred overnight under O<sub>2</sub> atmosphere for 24h and concentrated under reduced pressure. The residue was washed with Et<sub>2</sub>O, dissolved in THF and diffused with Et<sub>2</sub>O to yield the product as blue crystals (22.1 mg, 53%). Anal. Calcd. (%) for C<sub>33</sub>H<sub>31</sub>CuF<sub>6</sub>N<sub>5</sub>O<sub>6</sub>S<sub>2</sub>: C, 47.45; H, 3.74; N, 8.38. Found (%) C, 47.94; H, 4.01; 8.12.

**(7) PyCOOH**

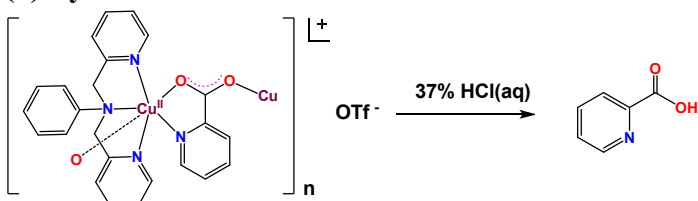

The compound **1b** (0.1 mmol) was stirred in concentrated HCl (37%, 1 mL) for 2 hours and the resultant solution was extracted with CH<sub>2</sub>Cl<sub>2</sub> (3×20 mL). The combined organic layer was washed with water (3×10 mL) and dried over anhydrous Na<sub>2</sub>SO<sub>4</sub> over night. The white solid was filtered off and the solvent was removed in vacuo. The residue was washed with Et<sub>2</sub>O to give product as some white solid (6.4 mg, 61%).

**3. General experimental procedure A-E for organic synthesis**

**General Experimental Procedure A**

Cu(OTf)<sub>2</sub> (3.6 mg, 0.01 mmol), *N,N*-bis(pyridin-2-ylmethyl)phenylamine (L<sub>N</sub>) (4.1 mg, 0.015 mmol), *t*-BuOK (22.4 mg, 0.2 mmol), *N*-(pyridin-2-ylmethyl)aniline derivatives (0.1 mmol) were mixed in dried DMF (1 mL) in a 35 mL Teflon screw-cap sealed tube. The tube was charged with O<sub>2</sub> (1 atm) and the mixture was vigorously stirred at RT for 24 h. After reaction was completed, the reaction mixture was diluted with dichloromethane (20 mL), filtered through a pad of silica gel and concentrated under reduced pressure. The crude product was purified on a silica gel column.

**(8) *N*-phenylpicolinamide (2a)<sup>1</sup>**

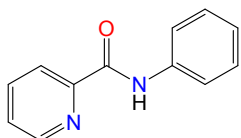

Following the general experimental procedure A presented above, using *N*-(pyridin-2-ylmethyl)aniline (18.4 mg, 0.1 mmol) as substrates instead, purified by column eluted with petroleum ether/EtOAc (10:1 v/v) to provide product as yellow solid (75% yield); <sup>1</sup>H NMR (400 MHz, CDCl<sub>3</sub>): δ 10.20 – 9.91 (m, 1H), 8.64 (d, *J* = 4.7 Hz, 1H), 8.33 (d, *J* = 7.8 Hz, 1H), 7.93 (td, *J* = 7.7, 1.7 Hz, 1H), 7.85 – 7.78 (m, 2H), 7.56 – 7.46 (m, 1H), 7.42 (dd, *J* = 10.8, 5.1 Hz, 2H), 7.18 (t, *J* = 7.4 Hz, 1H). <sup>13</sup>C NMR (101 MHz, CDCl<sub>3</sub>): δ 162.01, 149.82, 147.99, 137.76, 137.71, 129.11, 126.48, 124.34, 122.43, 119.70. HRMS *m/z* (ESI) [M + Na<sup>+</sup>]: 221.0685.

**(9) N-(p-tolyl)picolinamide (2b)<sup>2</sup>**

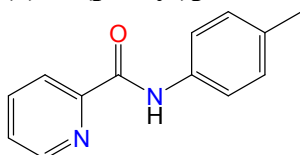

Following the general experimental procedure A presented above, using *4-methyl-N-(pyridin-2-ylmethyl)aniline* (19.8 mg, 0.1 mmol) as substrates instead, purified by column eluted with petroleum ether/EtOAc (10:1 v/v) to provide product as a white solid (92% yield); <sup>1</sup>H NMR (400 MHz, CDCl<sub>3</sub>): δ 9.99 (s, 1H), 8.63 (d, *J* = 4.7 Hz, 1H), 8.40 – 8.26 (m, 1H), 7.98 – 7.86 (m, 1H), 7.71 (t, *J* = 8.8 Hz, 2H), 7.55 – 7.45 (m, 1H), 7.20 (t, *J* = 10.0 Hz, 2H), 2.37 (s, 3H). <sup>13</sup>C NMR (101 MHz, CDCl<sub>3</sub>): δ 161.87, 149.95, 147.95, 137.66, 135.23, 133.93, 129.60, 126.36, 122.37, 119.68, 20.95.

**(10) N-(m-tolyl)picolinamide (2c)<sup>2</sup>**

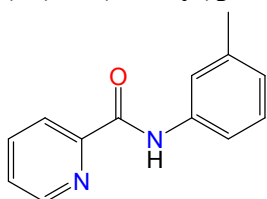

Following the general experimental procedure A presented above, using *3-methyl-N-(pyridin-2-ylmethyl)aniline* (19.8 mg, 0.1 mmol) as substrates instead, purified by column eluted with petroleum ether/EtOAc (10:1 v/v) to provide product as a colorless oil (68% yield); <sup>1</sup>H NMR (400 MHz, CDCl<sub>3</sub>): δ 10.07 (d, *J* = 44.7 Hz, 1H), 8.64 (ddd, *J* = 4.8, 1.6, 0.9 Hz, 1H), 8.32 (dt, *J* = 7.8, 1.0 Hz, 1H), 7.93 (td, *J* = 7.7, 1.7 Hz, 1H), 7.68 (d, *J* = 4.7 Hz, 1H), 7.60 (d, *J* = 8.0 Hz, 1H), 7.50 (ddd, *J* = 7.6, 4.8, 1.2 Hz, 1H), 7.29 (q, *J* = 3.1 Hz, 1H), 6.99 (d, *J* = 7.6 Hz, 1H). <sup>13</sup>C NMR (101 MHz, CDCl<sub>3</sub>): δ 161.96, 149.90, 147.96, 139.01, 137.69, 137.66, 128.92, 126.42, 125.16, 122.39, 120.34, 116.80, 21.55.

**(11) N-(o-tolyl)picolinamide (2d)<sup>3</sup>**

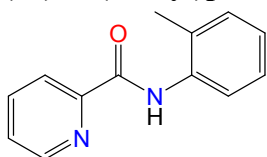

Following the general experimental procedure A presented above, using *2-methyl-N-(pyridin-2-ylmethyl)aniline* (19.8 mg, 0.1 mmol) as substrates instead, purified by column eluted with petroleum ether/EtOAc (10:1 v/v) to provide product as a colorless oil (51% yield); <sup>1</sup>H NMR (400 MHz, CDCl<sub>3</sub>): δ 10.12 (s, 1H), 8.65 (dd, *J* = 5.7, 4.9 Hz, 1H), 8.32 (dd, *J* = 13.3, 7.7 Hz, 2H), 7.94 (tdd, *J* = 5.4, 3.9, 1.8 Hz, 1H), 7.55 – 7.50 (m, 1H), 7.34 – 7.29 (m, 1H), 7.26 (d, *J* = 7.4 Hz, 1H), 7.11 (td, *J* = 7.5, 1.0 Hz, 1H), 2.45 (s, 3H). <sup>13</sup>C NMR (101 MHz, CDCl<sub>3</sub>): δ 161.92, 150.16, 148.10, 137.67, 130.42, 128.04, 126.91, 126.41, 124.58, 122.41, 121.33, 119.69, 17.76.

**(12) N-(2, 6-dimethylphenyl)picolinamide (2e)<sup>4</sup>**

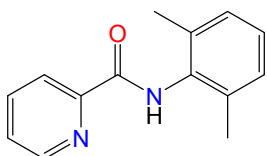

Following the general experimental procedure A presented above, using 2,6-dimethyl- N-(pyridin-2-ylmethyl)aniline (21.2 mg, 0.1 mmol) as substrates instead, purified by column eluted with petroleum ether/EtOAc (10:1 v/v) to provide product as a white solid (38% yield); <sup>1</sup>H NMR (400 MHz, CDCl<sub>3</sub>): δ 9.51 (s, 1H), 8.66 (ddd, *J* = 4.8, 1.6, 0.9 Hz, 1H), 8.33 (dt, *J* = 7.8, 1.0 Hz, 1H), 7.93 (td, *J* = 7.7, 1.7 Hz, 1H), 7.52 (ddd, *J* = 7.6, 4.8, 1.2 Hz, 1H), 7.18 – 7.13 (m, 3H), 2.33 (s, 6H). <sup>13</sup>C NMR (101 MHz, CDCl<sub>3</sub>): δ 161.92, 150.16, 148.10, 137.67, 130.42, 128.04, 126.91, 126.41, 124.58, 122.41, 121.33, 119.69, 17.76.

**(13) N-(4-ethylphenyl)picolinamide (2f)**

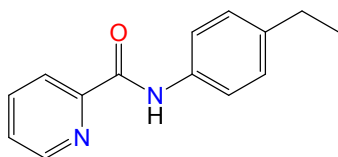

Following the general experimental procedure A presented above, using 4-ethyl-N-(pyridin-2-ylmethyl)aniline (21.2 mg, 0.1 mmol) as substrates instead, purified by column eluted with petroleum ether/EtOAc (10:1 v/v) to provide product as a colorless oil (70% yield); <sup>1</sup>H NMR (400 MHz, CDCl<sub>3</sub>): δ 10.00 (s, 1H), 8.64 (ddd, *J* = 4.8, 1.6, 0.9 Hz, 1H), 8.32 (dt, *J* = 7.9, 1.0 Hz, 1H), 7.93 (td, *J* = 7.7, 1.7 Hz, 1H), 7.77 – 7.68 (m, 2H), 7.56 – 7.45 (m, 1H), 7.23 (t, *J* = 9.6 Hz, 2H), 2.67 (q, *J* = 7.6 Hz, 2H), 1.30 – 1.26 (m, 3H). <sup>13</sup>C NMR (101 MHz, CDCl<sub>3</sub>): δ 161.92, 150.16, 148.10, 137.67, 130.42, 128.04, 126.91, 126.41, 124.58, 122.41, 121.33, 119.69, 17.76. HRMS *m/z* (ESI) [*M* + Na<sup>+</sup>]: 249.0999.

**(14) N-(4-methoxyphenyl)picolinamide (2g)<sup>1</sup>**

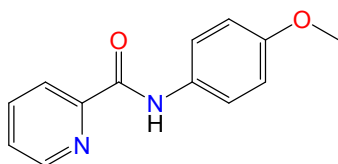

Following the general experimental procedure A presented above, using 4-methoxy-N-(pyridin-2-ylmethyl)aniline (21.4 mg, 0.1 mmol) as substrates instead, purified by column eluted with petroleum ether/EtOAc (10:1 v/v) to provide product as a white solid (82% yield); <sup>1</sup>H NMR (400 MHz, CDCl<sub>3</sub>): δ 9.89 (d, *J* = 45.7 Hz, 1H), 8.63 (ddd, *J* = 4.8, 1.6, 0.9 Hz, 1H), 8.31 (dt, *J* = 7.9, 1.0 Hz, 1H), 7.92 (td, *J* = 7.7, 1.7 Hz, 1H), 7.81 – 7.67 (m, 2H), 7.49 (ddd, *J* = 7.6, 4.8, 1.2 Hz, 1H), 7.03 – 6.92 (m, 2H), 3.84 (s, 3H). <sup>13</sup>C NMR (101 MHz, CDCl<sub>3</sub>): δ 161.92, 150.16, 148.10, 137.67, 130.42, 128.04, 126.91, 126.41, 124.58, 122.41, 121.33, 119.69, 17.76.

**(15) N-(4-iodophenyl)picolinamide (2h)<sup>1</sup>**

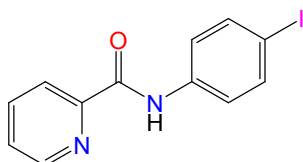

Following the general experimental procedure A presented above, using 4-iodo-N-(pyridin-2-ylmethyl)aniline (31 mg, 0.1 mmol) as substrates instead, purified by column eluted with petroleum ether/EtOAc (10:1 v/v) to provide product as a white solid (80% yield); <sup>1</sup>H NMR (400 MHz, CDCl<sub>3</sub>): δ 10.11 (d, *J* = 44.9 Hz, 1H), 8.71 – 8.58 (m, 1H), 8.32 (t, *J* = 8.7 Hz, 1H), 7.94 (td,

$J = 7.7, 1.7$  Hz, 1H), 7.76 – 7.65 (m, 2H), 7.65 – 7.57 (m, 2H), 7.52 (ddd,  $J = 7.6, 4.8, 1.2$  Hz, 1H).  $^{13}\text{C}$  NMR (101 MHz,  $\text{CDCl}_3$ ):  $\delta$  162.06, 149.50, 148.02, 138.02, 137.79, 137.53, 126.66, 122.47, 121.53, 87.50.

**(16) N-(4-(trifluoromethyl)phenyl)picolinamide (2i)<sup>2</sup>**

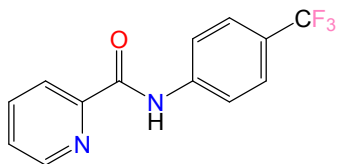

Following the general experimental procedure A presented above, using N-(pyridin-2-ylmethyl) 4-(trifluoromethyl)aniline (25.2 mg, 0.1 mmol) as substrates instead, purified by column eluted with petroleum ether/EtOAc (10:1 v/v) to provide product as a white solid (68% yield);  $^1\text{H}$  NMR (400 MHz,  $\text{CDCl}_3$ ):  $\delta$  10.23 (s, 1H), 8.66 (d,  $J = 4.7$  Hz, 1H), 8.34 (d,  $J = 7.8$  Hz, 1H), 8.01 – 7.89 (m, 3H), 7.67 (d,  $J = 8.6$  Hz, 2H), 7.55 (ddd,  $J = 7.5, 4.8, 1.1$  Hz, 1H).  $^{13}\text{C}$  NMR (101 MHz,  $\text{CDCl}_3$ ):  $\delta$  162.30, 149.28, 148.07, 140.75, 137.87, 126.85, 126.40, 126.36, 122.60, 119.34, 100.00.

**(17) N-(4-benzoylphenyl)picolinamide (2j)**

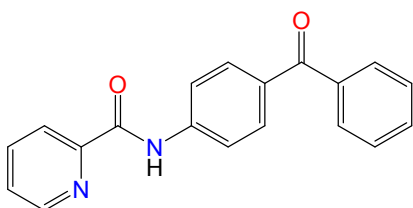

Following the general experimental procedure A presented above, using phenyl-(4-((pyridin-2-ylmethyl)amino)phenyl)methanone (28.2 mg, 0.1 mmol) as substrates instead, purified by column eluted with petroleum ether/EtOAc (5:1 v/v) to provide product as a white solid (72% yield);  $^1\text{H}$  NMR (400 MHz,  $\text{CDCl}_3$ ):  $\delta$  10.29 (s, 1H), 8.67 (ddd,  $J = 4.8, 1.6, 0.9$  Hz, 1H), 8.34 (dt,  $J = 7.8, 1.0$  Hz, 1H), 8.06 – 7.77 (m, 7H), 7.68 – 7.47 (m, 4H).  $^{13}\text{C}$  NMR (101 MHz,  $\text{CDCl}_3$ ):  $\delta$  195.67, 162.31, 149.32, 148.09, 141.62, 137.93, 137.88, 133.10, 132.20, 131.76, 129.91, 128.29, 126.86, 122.61, 118.88. HRMS  $m/z$  (ESI)  $[\text{M} + \text{H}^+]$ : 303.1128.

**(18) 3-methyl-N-(p-tolyl)-4-(2,2,2-trifluoroethoxy)picolinamide (2k)**

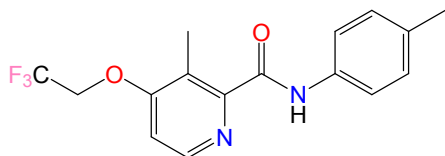

Following the general experimental procedure A presented above, using 4-methyl-N-((3-methyl-4-(2,2,2-trifluoroethoxy)pyridin-2-yl)methyl)aniline (31 mg, 0.1 mmol) as substrates instead, purified by column eluted with petroleum ether/EtOAc (5:1 v/v) to provide product as a white solid (70% yield);  $^1\text{H}$  NMR (400 MHz,  $\text{CDCl}_3$ ):  $\delta$  10.12 (s, 1H), 8.40 (d,  $J = 5.4$  Hz, 1H), 7.66 (t,  $J = 10.2$  Hz, 2H), 7.20 (d,  $J = 8.2$  Hz, 2H), 6.86 (d,  $J = 5.5$  Hz, 1H), 4.46 (q,  $J = 7.8$  Hz, 2H), 2.75 (s, 3H), 2.36 (s, 3H).  $^{13}\text{C}$  NMR (101 MHz,  $\text{CDCl}_3$ ):  $\delta$  161.92, 150.16, 148.10, 137.67, 130.42, 128.04, 126.91, 126.41, 124.58, 122.41, 121.33, 119.69, 17.76. HRMS  $m/z$  (ESI)  $[\text{M} + \text{Na}^+]$ : 347.0978.



### (19) 4-chloro-N-phenylpicolinamide (2l)<sup>1</sup>

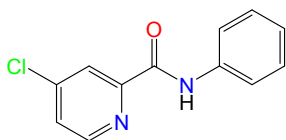

Following the general experimental procedure A presented above, using *N*-((4-chloropyridin-2-yl)-methyl)aniline (22 mg, 0.1 mmol) as substrates instead, purified by column eluted with petroleum ether/EtOAc (10:1 v/v) to provide product as a white solid (77% yield); <sup>1</sup>H NMR (400 MHz, CDCl<sub>3</sub>): δ 9.94 (s, 1H), 8.54 (d, *J* = 5.2 Hz, 1H), 8.33 (d, *J* = 1.9 Hz, 1H), 7.79 (dd, *J* = 8.5, 1.0 Hz, 2H), 7.54 – 7.48 (m, 1H), 7.47 – 7.39 (m, 2H), 7.25 – 7.14 (m, 1H). <sup>13</sup>C NMR (101 MHz, CDCl<sub>3</sub>): δ 160.79, 151.34, 148.88, 146.31, 137.43, 129.16, 126.64, 124.64, 123.09, 119.77.

### (20) 4-(3-methoxypropoxy)-3-methyl-N-(p-tolyl)picolinamide (2m)

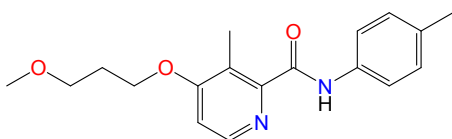

Following the general experimental procedure A presented above, using *N*-((4-(3-methoxypropoxy)-3-methylpyridin-2-yl)methyl)-4-methylaniline (30 mg, 0.1 mmol) as substrates instead, purified by column eluted with petroleum ether/EtOAc (10:1 v/v) to provide product as a white solid (61% yield); <sup>1</sup>H NMR (400 MHz, CDCl<sub>3</sub>): δ 10.19 (s, 1H), 8.33 (dd, *J* = 5.3, 1.9 Hz, 1H), 7.65 (d, *J* = 6.4 Hz, 2H), 7.19 (d, *J* = 6.9 Hz, 2H), 6.90 (dd, *J* = 5.3, 2.0 Hz, 1H), 4.17 (dd, *J* = 6.1, 4.0 Hz, 2H), 3.62 (td, *J* = 5.9, 2.2 Hz, 2H), 3.39 (d, *J* = 2.5 Hz, 3H), 2.70 (d, *J* = 2.1 Hz, 3H), 2.36 (d, *J* = 1.3 Hz, 3H), 2.16 (ddd, *J* = 9.8, 8.2, 5.9 Hz, 2H). <sup>13</sup>C NMR (101 MHz, CDCl<sub>3</sub>): δ 164.93, 163.96, 147.74, 146.26, 135.65, 133.51, 129.47, 125.64, 119.67, 108.02, 77.35, 77.03, 76.71, 68.79, 65.39, 58.82, 29.33, 20.93, 11.01. HRMS *m/z* (ESI) [M + H<sup>+</sup>]: 315.1705.

### (21) 4-methoxy-3,5-dimethyl-N-(p-tolyl)picolinamide (2n)

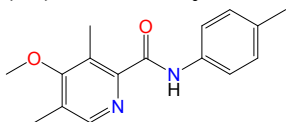

Following the general experimental procedure A presented above, using *N*-((4-methoxy-3,5-dimethylpyridin-2-yl)methyl)-4-methylaniline (25.6 mg, 0.1 mmol) as substrates instead, purified by column eluted with petroleum ether/EtOAc (5:1 v/v) to provide product as a white solid (46% yield); <sup>1</sup>H NMR (400 MHz, CDCl<sub>3</sub>): δ 10.11 (s, 1H), 8.25 (s, 1H), 7.64 (d, *J* = 8.4 Hz, 2H), 7.19 (d, *J* = 8.3 Hz, 2H), 3.82 (s, 3H), 2.74 (s, 3H), 2.35 (d, *J* = 3.7 Hz, 6H). <sup>13</sup>C NMR (101 MHz, CDCl<sub>3</sub>): δ 161.92, 150.16, 148.10, 137.67, 130.42, 128.04, 126.91, 126.41, 124.58, 122.41, 121.33, 119.69, 17.76. HRMS *m/z* (ESI) [M + Na<sup>+</sup>]: 293.1260.

### General Experimental Procedure B

Cu(OTf)<sub>2</sub> (3.6 mg, 0.01 mmol), *N,N*-bis(pyridin-2-ylmethyl)phenylamine (L<sub>N</sub>) (4.1 mg, 0.015 mmol), Et<sub>3</sub>N (0.1 mL), *N*-(pyridin-2-ylmethyl)aniline derivatives (0.1 mmol) were mixed in dried DMF (1 mL) in a 35 mL Teflon screwcap sealed tube. The tube was charged with O<sub>2</sub> (1 atm) and the mixture was vigorously stirred at RT for 24 h. After reaction was completed, the reaction mixture was diluted with dichloromethane (20 mL), filtered through a pad of silica gel and concentrated under reduced pressure. The crude product was purified on a silica gel column.

**(22) *N*-(pyridin-2-ylmethylene)aniline (3a)<sup>5</sup>**

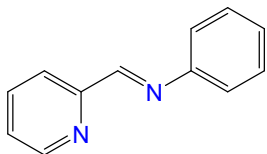

Following the general experimental procedure B presented above, using *N*-(pyridin-2-ylmethyl)aniline (18.3 mg, 0.1 mmol) as substrates instead, purified by column eluted with petroleum ether/EtOAc (10:1 v/v) to provide product as a yellow oil (83% yield); <sup>1</sup>H NMR (400 MHz, CDCl<sub>3</sub>): δ 8.85 – 8.60 (m, 2H), 8.22 (d, *J* = 7.7 Hz, 1H), 7.94 – 7.78 (m, 1H), 7.50 – 7.36 (m, 3H), 7.37 – 7.24 (m, 3H). <sup>13</sup>C NMR (101 MHz, CDCl<sub>3</sub>): δ 160.65, 154.54, 150.96, 149.70, 136.74, 129.27, 126.78, 125.19, 121.93, 121.13. HRMS *m/z* (ESI) [*M* + H<sup>+</sup>]: 183.0917.

**(23) 4-methyl-*N*-(pyridin-2-ylmethylene)aniline (3b)<sup>6</sup>**

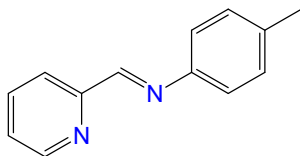

Following the general experimental procedure B presented above, using 4-methyl-*N*-(pyridin-2-ylmethyl)aniline (19.8mg, 0.1 mmol) as substrates instead, purified by column eluted with petroleum ether/EtOAc (10:1 v/v) to provide product as a yellow oil (88% yield); H NMR (400 MHz, CDCl<sub>3</sub>): δ 8.77 – 8.71 (m, 1H), 8.64 (s, 1H), 8.22 (d, *J* = 7.9 Hz, 1H), 7.89 – 7.80 (m, 1H), 7.38 (ddd, *J* = 7.5, 4.8, 1.2 Hz, 1H), 7.25 (s, 4H), 2.41 (s, 3H). <sup>13</sup>C NMR (101 MHz, CDCl<sub>3</sub>): δ 159.71, 154.72, 149.69, 148.33, 136.68, 129.88, 125.02, 121.83, 121.13, 115.27, 76.73, 21.09.

**(24) thyl-*N*-(pyridin-2-ylmethylene)aniline (3c)<sup>7</sup>**

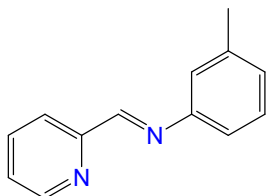

Following the general experimental procedure B presented above, using 3-methyl-*N*-(pyridin-2-ylmethyl)aniline (19.8 mg, 0.1 mmol) as substrates instead, purified by column eluted with petroleum ether/EtOAc (10:1 v/v) to provide product as a yellow oil (60% yield); <sup>1</sup>H NMR (400 MHz, CDCl<sub>3</sub>): δ 8.75 (d, *J* = 4.3 Hz, 1H), 8.62 (s, 1H), 8.21 (d, *J* = 7.9 Hz, 1H), 7.85 (td, *J* = 7.6, 1.4 Hz, 1H), 7.41 (ddd, *J* = 7.5, 4.9, 1.1 Hz, 1H), 7.33 (t, *J* = 7.6 Hz, 1H), 7.18 – 7.10 (m, 3H), 2.42 (s, 3H). <sup>13</sup>C NMR (101 MHz, CDCl<sub>3</sub>): δ 160.30, 149.71, 139.13, 137.10, 136.83, 129.08, 127.90, 127.62, 125.22, 122.02, 121.95, 118.09, 21.41.

**(25) 2-methyl-*N*-(pyridin-2-ylmethylene)aniline (3d)<sup>8</sup>**

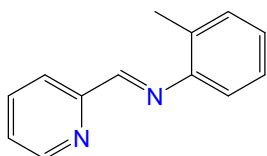

Following the general experimental procedure B presented above, using 2-methyl-*N*-(pyridin-2-ylmethyl)aniline (19.8mg, 0.1 mmol) as substrates instead, purified by column eluted with petroleum ether/EtOAc (10:1 v/v) to provide product as a yellow oil (28% yield); <sup>1</sup>H NMR (400 MHz, CDCl<sub>3</sub>): δ 8.74 (d, *J* = 4.4 Hz, 1H), 8.54 (s, 1H), 8.29 (d, *J* = 7.9 Hz, 1H), 7.85 (td, *J* = 7.6,

1.3 Hz, 1H), 7.40 (ddt,  $J = 7.7, 4.0, 2.0$  Hz, 1H), 7.23 – 7.17 (m, 1H), 6.79 – 6.69 (m, 3H), 2.42 (s, 3H).  $^{13}\text{C}$  NMR (101 MHz,  $\text{CDCl}_3$ ):  $\delta$  159.91, 150.06, 149.60, 136.67, 132.27, 130.40, 127.89, 126.83, 126.40, 125.07, 121.67, 117.58, 17.87.

**(26) 4-ethyl-N-(pyridin-2-ylmethylene)aniline (3e)<sup>9</sup>**

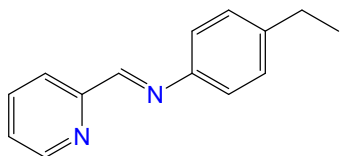

Following the general experimental procedure B presented above, using *4-ethyl-N-(pyridin-2-ylmethyl)aniline* (21 mg, 0.1 mmol) as substrates instead, purified by column eluted with petroleum ether/EtOAc (10:1 v/v) to provide product as a yellow oil (74% yield);  $^1\text{H}$  NMR (400 MHz,  $\text{CDCl}_3$ ):  $\delta$  8.73 (ddd,  $J = 4.8, 1.6, 0.9$  Hz, 1H), 8.65 (d,  $J = 4.7$  Hz, 1H), 8.23 (d,  $J = 7.9$  Hz, 1H), 7.83 (td,  $J = 7.6, 1.4$  Hz, 1H), 7.38 (ddd,  $J = 7.5, 4.9, 1.1$  Hz, 1H), 7.28 (s, 3H), 7.01 (d,  $J = 8.4$  Hz, 1H), 6.69 – 6.63 (m, 1H), 2.71 (q,  $J = 7.6$  Hz, 2H), 1.30 – 1.27 (m, 3H).  $^{13}\text{C}$  NMR (101 MHz,  $\text{CDCl}_3$ ):  $\delta$  159.72, 154.76, 149.68, 148.51, 143.18, 136.67, 128.68, 125.00, 121.83, 121.20, 115.29, 28.49, 15.59.

**(27) N-((4-chloropyridin-2-yl)methylene)aniline (3f)**

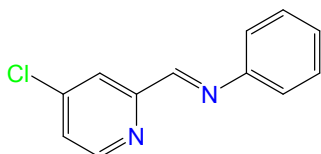

Following the general experimental procedure B presented above, using *N-((4-chloropyridin-2-yl)methyl)aniline* (22 mg, 0.1 mmol) as substrates instead, purified by column eluted with petroleum ether/EtOAc (10:1 v/v) to provide product as a yellow oil (82% yield);  $^1\text{H}$  NMR (400 MHz,  $\text{CDCl}_3$ ):  $\delta$  8.69 – 8.57 (m, 2H), 8.27 (d,  $J = 1.7$  Hz, 1H), 7.50 – 7.37 (m, 3H), 7.33 (t,  $J = 6.0$  Hz, 3H).  $^{13}\text{C}$  NMR (101 MHz,  $\text{CDCl}_3$ ):  $\delta$  159.19, 156.07, 150.46, 145.04, 129.33, 127.92, 127.18, 125.29, 122.05, 121.17. Anal. Calcd. (%) for  $\text{C}_{12}\text{H}_9\text{N}_2\text{Cl}$ : C, 66.52; H, 4.19; N, 12.93. Found (%) C, 66.13; H, 4.68; N, 12.55.

**(28) 4-methoxy-N-(pyridin-2-ylmethylene)aniline<sup>6</sup>(3g)**

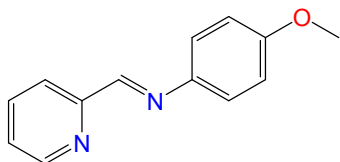

Following the general experimental procedure B presented above, using *4-methoxy-N-(pyridin-2-ylmethyl)aniline* (22 mg, 0.1 mmol) as substrates instead, purified by column eluted with petroleum ether/EtOAc (5:1 v/v) to provide product as a yellow oil (51% yield);  $^1\text{H}$  NMR (400 MHz,  $\text{CDCl}_3$ ):  $\delta$  8.71 (ddd,  $J = 4.8, 1.6, 0.9$  Hz, 1H), 8.64 (d,  $J = 4.7$  Hz, 1H), 8.20 (dd,  $J = 4.9, 4.0$  Hz, 1H), 7.85 – 7.77 (m, 1H), 7.39 – 7.32 (m, 3H), 7.00 – 6.94 (m, 2H), 3.85 (s, 3H).  $^{13}\text{C}$  NMR (101 MHz,  $\text{CDCl}_3$ ):  $\delta$  158.96, 158.25, 154.86, 149.65, 143.69, 136.65, 124.84, 122.69, 121.67, 114.47, 55.50.

**General Experimental Procedure C**

To a solution of 2-clormethyl-pyridine hydrochloride (492 mg, 3 mmol) in H<sub>2</sub>O (8 mL) was added aniline (3 mmol). The mixture was heated to 50°C and a solution of NaOH (240 mg, 6 mmol) in H<sub>2</sub>O (2 mL) was quickly added. The dark brown mixture was stirred at 50°C for 24 h and the reacting solution was extracted with CHCl<sub>3</sub> (4×30 mL). The combined organic layer was dried over anhydrous Na<sub>2</sub>SO<sub>4</sub> for 5 hours, filtered, and solvent was removed to give a brown oil. The crude product was purified on a silica gel column.

**(29) N-(2-Pyridylmethyl)phenylamine<sup>10</sup>**

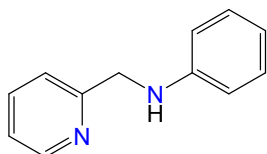

Following the general experimental procedure C presented above, using aniline (280 mg, 3 mmol) as substrates instead, purified by column eluted with petroleum ether/EtOAc (5:1 v/v) to provide product as a brown solid (82% yield). <sup>1</sup>H NMR (400 MHz, CDCl<sub>3</sub>): δ 8.62 (d, *J* = 4.8 Hz, 1H), 7.65 (td, *J* = 7.7, 1.7 Hz, 1H), 7.36 (d, *J* = 7.8 Hz, 1H), 7.26 – 7.13 (m, 3H), 6.87 – 6.65 (m, 3H), 4.49 (s, 2H). <sup>13</sup>C NMR (101 MHz, CDCl<sub>3</sub>): δ 158.62, 149.22, 147.96, 136.70, 129.31, 122.14, 121.63, 117.60, 113.37, 113.08, 49.31, 29.77.

**(30) 4-methyl-N-(pyridin-2-ylmethyl)aniline<sup>11</sup>**

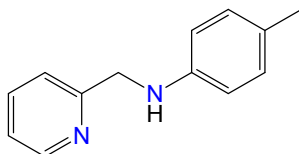

Following the general experimental procedure C presented above, using *p*-Toluidine (321 mg, 3 mmol) as substrates instead, purified by column eluted with petroleum ether/EtOAc (3:1 v/v) to provide product as brown oil (76% yield). <sup>1</sup>H NMR (400 MHz, CDCl<sub>3</sub>): δ 8.61 (d, *J* = 4.7 Hz, 1H), 7.65 (t, *J* = 7.6 Hz, 1H), 7.36 (d, *J* = 7.8 Hz, 1H), 7.23 – 7.17 (m, 1H), 7.02 (d, *J* = 8.1 Hz, 2H), 6.62 (d, *J* = 8.2 Hz, 2H), 4.47 (s, 2H), 2.26 (s, 3H). <sup>13</sup>C NMR (101 MHz, CDCl<sub>3</sub>): δ 158.86, 149.22, 145.65, 136.65, 129.76, 126.81, 122.06, 121.61, 113.21, 60.43, 49.69, 20.42, 14.23.

**(31) 3-methyl-N-(pyridin-2-ylmethyl)aniline<sup>12</sup>**

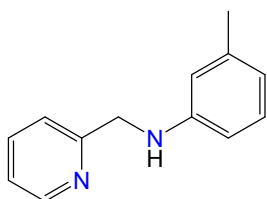

Following the general experimental procedure C presented above, using *m*-Toluidine (321 mg, 3 mmol) as substrates instead, purified by column eluted with petroleum ether/EtOAc (3:1 v/v) to provide product as a brown oil (92% yield). <sup>1</sup>H NMR (400 MHz, CDCl<sub>3</sub>): δ 8.67 – 8.60 (m, 1H), 7.66 (td, *J* = 7.7, 1.8 Hz, 1H), 7.36 (d, *J* = 7.8 Hz, 1H), 7.20 (dd, *J* = 6.9, 5.2 Hz, 1H), 7.11 (t, *J* = 7.7 Hz, 1H), 6.63 – 6.49 (m, 3H), 4.49 (s, 2H), 2.31 (s, 3H). <sup>13</sup>C NMR (101 MHz, CDCl<sub>3</sub>): δ 158.71, 149.21, 147.98, 139.05, 136.65, 129.16, 122.08, 121.59, 118.58, 113.88, 110.21, 49.35, 21.67.

**(32) 2-methyl-N-(pyridin-2-ylmethyl)aniline<sup>13</sup>**

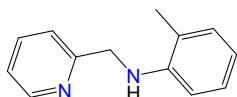

Following the general experimental procedure C presented above, using *o*-Toluidine (321 mg, 3 mmol) as substrates instead, purified by column eluted with petroleum ether/EtOAc (5:1 v/v) to provide product as a brown oil (82% yield). <sup>1</sup>H NMR (400 MHz, CDCl<sub>3</sub>) δ 8.70 – 8.56 (m, 1H), 7.67 (td, *J* = 7.7, 1.8 Hz, 1H), 7.37 (d, *J* = 7.8 Hz, 1H), 7.25 – 7.10 (m, 3H), 6.70 (ddd, *J* = 38.6, 22.6, 4.3 Hz, 2H), 4.55 (s, 2H), 2.30 (s, 3H). <sup>13</sup>C NMR (101 MHz, CDCl<sub>3</sub>) δ 158.58, 149.26, 145.90, 136.65, 130.12, 127.14, 122.35, 122.12, 121.61, 117.22, 110.14, 77.43, 77.11, 76.79, 49.29, 17.63.

### (33) 2,6-dimethyl-N-(pyridin-2-ylmethyl)aniline<sup>14</sup>

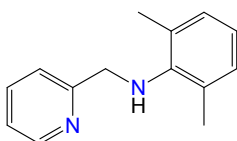

Following the general experimental procedure C presented above, using 2,6-dimethylaniline (363 mg, 3 mmol) as substrates instead, purified by column eluted with petroleum ether/EtOAc (5:1 v/v) to provide product as a brown oil (61% yield). <sup>1</sup>H NMR (400 MHz, CDCl<sub>3</sub>): δ 8.64 (dd, *J* = 4.8, 0.6 Hz, 1H), 7.66 (td, *J* = 7.7, 1.8 Hz, 1H), 7.30 – 7.26 (m, 1H), 7.24 – 7.19 (m, 1H), 7.03 (d, *J* = 7.5 Hz, 2H), 6.86 (dd, *J* = 9.3, 5.6 Hz, 1H), 4.32 (s, 2H), 2.36 (s, 6H). <sup>13</sup>C NMR (101 MHz, CDCl<sub>3</sub>): δ 159.15, 149.29, 146.15, 136.47, 129.53, 128.82, 122.13, 122.02, 121.89, 53.68, 18.68.

### (34) 4-ethyl-N-(pyridin-2-ylmethyl)aniline

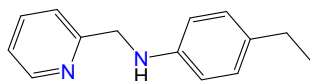

Following the general experimental procedure C presented above, using 4-ethylaniline (366 mg, 3 mmol) as substrates instead, purified by column eluted with petroleum ether/EtOAc (6:1 v/v) to provide product as a colorless oil (81% yield). <sup>1</sup>H NMR (400 MHz, CDCl<sub>3</sub>): δ 8.62 (ddd, *J* = 4.9, 1.6, 0.8 Hz, 1H), 7.65 (td, *J* = 7.7, 1.8 Hz, 1H), 7.37 (d, *J* = 7.8 Hz, 1H), 7.20 (dd, *J* = 6.9, 5.4 Hz, 1H), 7.06 (t, *J* = 5.6 Hz, 2H), 6.72 – 6.60 (m, 2H), 4.48 (s, 2H), 2.58 (q, *J* = 7.6 Hz, 2H), 1.23 (t, *J* = 7.6 Hz, 3H). <sup>13</sup>C NMR (101 MHz, CDCl<sub>3</sub>): δ 158.91, 149.22, 145.91, 136.65, 133.44, 128.60, 122.06, 121.62, 113.21, 49.70, 27.96, 15.97. Anal. Calcd. (%) for C<sub>14</sub>H<sub>16</sub>N<sub>2</sub>: C, 79.21; H, 7.60; N, 14.01. Found (%) C, 79.02; H, 7.93; 14.57.

### (35) 4-iodo-N-(pyridin-2-ylmethyl)aniline<sup>15</sup>

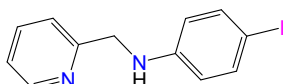

Following the general experimental procedure C presented above, using *p*-Iodoaniline (657 mg, 3 mmol) as substrates instead, purified by column eluted with petroleum ether/EtOAc (3:1 v/v) to provide product as a brown solid (77% yield). <sup>1</sup>H NMR (400 MHz, CDCl<sub>3</sub>): δ 8.59 (d, *J* = 4.4 Hz, 1H), 7.70 – 7.61 (m, 1H), 7.47 – 7.39 (m, 2H), 7.30 (d, *J* = 8.2 Hz, 1H), 7.20 (dd, *J* = 7.0, 5.1 Hz, 1H), 6.52 – 6.40 (m, 2H), 4.41 (s, 2H). <sup>13</sup>C NMR (101 MHz, CDCl<sub>3</sub>): δ 157.77, 149.22, 147.45, 137.79, 136.76, 122.30, 121.63, 115.30, 78.22, 77.49, 77.17, 76.86, 48.91.

### (36) 4-methoxy-N-(pyridin-2-ylmethyl)aniline<sup>12</sup>

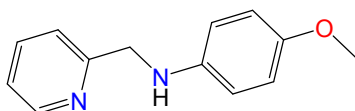

Following the general experimental procedure B presented above, using p-Anisidine (370 mg, 3 mmol) as substrates instead, purified by column eluted with petroleum ether/EtOAc (5:1 v/v) to provide product as a white solid (65% yield).  $^1\text{H}$  NMR (400 MHz,  $\text{CDCl}_3$ ):  $\delta$  8.59 (d,  $J = 4.8$  Hz, 1H), 7.64 (td,  $J = 7.7, 1.0$  Hz, 1H), 7.40 – 7.32 (m, 1H), 7.22 – 7.15 (m, 1H), 6.86 – 6.76 (m, 2H), 6.71 – 6.59 (m, 2H), 4.43 (s, 2H), 3.75 (s, 3H).  $^{13}\text{C}$  NMR (101 MHz,  $\text{CDCl}_3$ ):  $\delta$  158.87, 152.22, 149.18, 142.16, 136.68, 122.09, 121.69, 114.89, 114.31, 55.77, 50.24.

### (37) N-((4-chloropyridin-2-yl)methyl)aniline

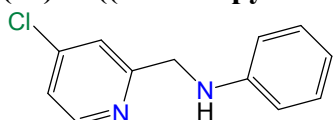

Following the general experimental procedure B presented above, using 4-chloro-2-(chloromethyl)pyridine (594 mg, 3 mmol) as substrates instead, purified by column eluted with petroleum ether/EtOAc (5:1 v/v) to provide product as a yellow solid (62% yield).  $^1\text{H}$  NMR (400 MHz,  $\text{CDCl}_3$ ):  $\delta$  8.50 (d,  $J = 5.3$  Hz, 1H), 7.41 (d,  $J = 1.6$  Hz, 1H), 7.21 (tt,  $J = 9.6, 1.9$  Hz, 3H), 6.83 – 6.60 (m, 3H), 4.48 (s, 2H).  $^{13}\text{C}$  NMR (101 MHz,  $\text{CDCl}_3$ ):  $\delta$  160.78, 150.11, 147.54, 144.93, 129.35, 122.61, 121.83, 117.98, 113.06, 49.23. HRMS  $m/z$  (ESI)  $[\text{M} + \text{H}^+]$ : 219.0685.

### General Experimental Procedure D

A mixture of 2-pyridinecarbaldehyde (300 mg, 0.3 mmol) and aniline (0.3 mmol) was heated to reflux in dry toluene for 3h. The solvent was removed under reduced pressure to afford the crude product, which was dissolved in  $\text{CH}_3\text{OH}/\text{CH}_2\text{Cl}_2$  [2:8 (v/v), 10 mL] and the solution was cooled in an ice bath.  $\text{NaBH}_4$  (52 mg, 1.39 mmol) was added in two batches between an interval of 30 mins. After the addition of  $\text{NaBH}_4$  was completed, the mixture was stirred for an additional 2 h. The solution was then diluted with water (20 mL) and extracted with  $\text{CH}_2\text{Cl}_2$  (3 $\times$ 20 mL). The organic layers were combined and dried with anhydrous  $\text{Na}_2\text{SO}_4$ . The solvent was removed under reduced pressure and the crude product was purified on a silica column.

### (38) N-(pyridin-2-ylmethyl)-4-(trifluoromethyl)aniline<sup>16</sup>

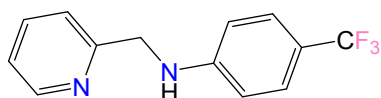

Following the general experimental procedure D presented above, using 4-(Trifluoromethyl)aniline (483 mg, 3 mmol) as substrates instead, purified by column eluted with petroleum ether/EtOAc (5:1 v/v) to provide product as a white solid (74% yield).  $^1\text{H}$  NMR (400 MHz,  $\text{CDCl}_3$ ):  $\delta$  8.69 – 8.57 (m, 1H), 7.75 – 7.65 (m, 1H), 7.42 (t,  $J = 9.4$  Hz, 2H), 7.32 (d,  $J = 7.8$  Hz, 1H), 7.27 – 7.21 (m, 1H), 6.70 (d,  $J = 8.5$  Hz, 2H), 5.44 – 5.17 (m, 1H), 4.50 (d,  $J = 5.3$  Hz, 2H).  $^{13}\text{C}$  NMR (101 MHz,  $\text{CDCl}_3$ ):  $\delta$  157.24, 150.30, 149.26, 136.78, 126.64, 126.60, 123.66, 122.39, 121.62, 119.15, 118.83, 112.17, 48.53.

### (39) phenyl(4-((pyridin-2-ylmethyl)amino)phenyl)methanone

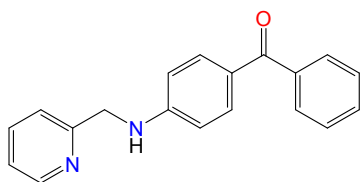

Following the general experimental procedure D presented above, using (4-aminophenyl)-(phenyl)methanone (576 mg, 3 mmol) as substrates instead, purified by column eluted with petroleum ether/EtOAc (5:1 v/v) to provide product as a white solid (68% yield).  $^1\text{H}$  NMR (400 MHz,  $\text{CDCl}_3$ )  $\delta$  8.61 – 8.49 (m, 1H), 7.63 (tt,  $J = 12.3, 6.1$  Hz, 1H), 7.43 – 7.38 (m, 2H), 7.37 – 7.30 (m, 3H), 7.28 – 7.23 (m, 1H), 7.21 – 7.12 (m, 3H), 6.70 – 6.54 (m, 2H), 5.76 (s, 1H), 4.41 (s, 2H).  $^{13}\text{C}$  NMR (101 MHz,  $\text{CDCl}_3$ ):  $\delta$  158.48, 149.14, 147.38, 144.43, 136.75, 133.32, 128.30, 127.99, 127.12, 126.40, 122.16, 121.63, 112.98, 77.42, 77.10, 76.78, 75.91, 49.21. HRMS  $m/z$  (ESI)  $[\text{M} + \text{H}^+]$ : 291.1492.

#### (40) N-benzyl-1-(pyridin-2-yl)methanamine

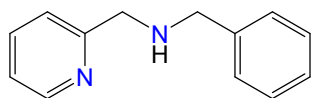

Following the general experimental procedure D presented above, using phenylmethanamine (321 mg, 3 mmol) as substrates instead, purified by column eluted with petroleum ether/EtOAc (1:3 v/v) to provide product as a yellow oil (90% yield).  $^1\text{H}$  NMR (400 MHz,  $\text{CDCl}_3$ ):  $\delta$  8.58 (d,  $J = 4.3$  Hz, 1H), 7.67 (dtd,  $J = 13.4, 7.7, 1.8$  Hz, 1H), 7.42 – 7.31 (m, 5H), 7.30 – 7.23 (m, 1H), 7.18 (dd,  $J = 6.6, 5.0$  Hz, 1H), 3.95 (s, 2H), 3.87 (s, 2H).  $^{13}\text{C}$  NMR (101 MHz,  $\text{CDCl}_3$ ):  $\delta$  159.73, 149.32, 140.12, 136.47, 128.42, 128.28, 127.01, 122.39, 121.98, 54.51, 53.52.

#### General Experimental Procedure E

A mixture of 2-clormethyl-pridine hydrochloride derivatives (3 mmol), NaI (450 mg, 3 mmol), NaOH (240 mg, 6 mmol) and p-Toluidine (321 mg, 3 mmol) was heated to reflux in dry  $\text{CH}_3\text{CN}$  for 24h. After reaction was completed, the reaction mixture was diluted with dichloromethane (20 mL), filtered through a pad of silica gel and concentrated under reduced pressure. The crude product was purified on a silica gel column.

#### (41) 4-methyl-N-((3-methyl-4-(2,2,2-trifluoroethoxy)pyridin-2-yl)methyl)aniline

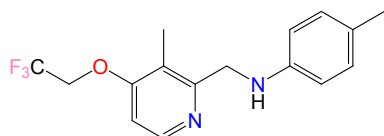

Following the general experimental procedure E presented above, using Aniline (280 mg, 3 mmol) as substrates instead, purified by column eluted with petroleum ether/EtOAc (5:1 v/v) to provide product as a white solid (54% yield).  $^1\text{H}$  NMR (400 MHz,  $\text{CDCl}_3$ ):  $\delta$  8.41 (d,  $J = 5.7$  Hz, 1H), 7.06 (d,  $J = 8.0$  Hz, 2H), 6.71 (ddd,  $J = 14.4, 8.1, 4.1$  Hz, 3H), 4.43 (q,  $J = 7.9$  Hz, 2H), 4.35 (s, 2H), 2.28 (d,  $J = 7.2$  Hz, 6H).  $^{13}\text{C}$  NMR (101 MHz,  $\text{CDCl}_3$ ):  $\delta$  161.22, 156.81, 147.39, 145.90, 129.76, 126.49, 119.85, 113.23, 105.27, 65.55, 65.19, 46.76, 20.43, 9.52. HRMS  $m/z$  (ESI)  $[\text{M} + \text{H}^+]$ : 311.1367.

#### (42) N-((4-(3-methoxypropoxy)-3-methylpyridin-2-yl)methyl)-4-methylaniline

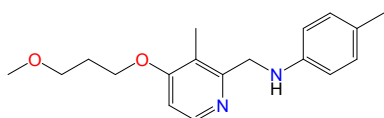

Following the general experimental procedure E presented above, using 2-(chloromethyl)-4-(3-methoxypropoxy)-3-methylpyridine hydrochloride (798 mg, 3 mmol) as substrates instead, purified by column eluted with petroleum ether/EtOAc (3:1 v/v) to provide product as a white solid (78% yield). <sup>1</sup>H NMR (400 MHz, CDCl<sub>3</sub>): δ 8.35 (d, *J* = 5.7 Hz, 1H), 7.04 (t, *J* = 13.7 Hz, 2H), 6.77 – 6.70 (m, 3H), 4.33 (s, 2H), 4.20 – 4.09 (m, 2H), 3.66 – 3.54 (m, 2H), 3.39 (s, 3H), 2.28 (d, *J* = 7.6 Hz, 3H), 2.22 (s, 3H), 2.13 (dd, *J* = 12.3, 6.1 Hz, 2H). <sup>13</sup>C NMR (101 MHz, CDCl<sub>3</sub>): δ 162.94, 155.64, 147.29, 146.11, 129.71, 126.23, 119.20, 113.20, 105.47, 68.95, 64.95, 58.80, 46.76, 29.42, 20.45, 9.64. HRMS *m/z* (ESI) [*M* + *H*<sup>+</sup>]: 301.1911.

**(43) N-((4-methoxy-3,5-dimethylpyridin-2-yl)methyl)-4-methylaniline**

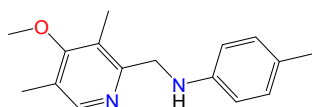

Following the general experimental procedure E presented above, using 2-(chloromethyl)-4-methoxy-3,5-dimethylpyridine hydrochloride (666 mg, 3 mmol) as substrates instead, purified by column eluted with petroleum ether/EtOAc (3:1 v/v) to provide product as a white solid (72% yield). <sup>1</sup>H NMR (400 MHz, CDCl<sub>3</sub>): δ 8.25 (d, *J* = 5.6 Hz, 1H), 7.03 (d, *J* = 8.0 Hz, 2H), 6.83 (t, *J* = 8.5 Hz, 1H), 6.73 (d, *J* = 8.3 Hz, 2H), 4.43 (s, 2H), 3.94 (t, *J* = 10.1 Hz, 6H), 2.24 (d, *J* = 16.0 Hz, 3H). <sup>13</sup>C NMR (101 MHz, CDCl<sub>3</sub>): δ 158.30, 151.61, 146.00, 145.32, 142.89, 129.67, 126.50, 113.48, 106.75, 60.83, 55.68, 44.16, 20.42. HRMS *m/z* (ESI) [*M* + *H*<sup>+</sup>]: 257.1648.

**(44) N-benzyl-N-(pyridin-2-ylmethyl)aniline<sup>17</sup>**

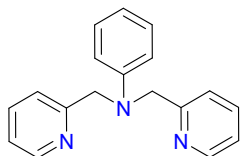

To a solution of 2-chloromethyl-pyridine hydrochloride (984 mg, 6 mmol) in H<sub>2</sub>O (10 mL) was added aniline (3 mmol). The mixture was heated to 50°C and an aqueous solution (2 mL) of NaOH (360 mg, 9 mmol) was quickly added. The dark brown mixture was stirred at 50°C for 24 h and the resultant solution was extracted with CHCl<sub>3</sub> (4×30 mL). The combined organic layers were combined and dried over anhydrous Na<sub>2</sub>SO<sub>4</sub> for 10 hours, filtered, and the solvent was removed to give a brown oil. The crude product was purified on a silica column eluted with petroleum ether/EtOAc (1:2 v/v) to provide product as a white solid (80% yield). <sup>1</sup>H NMR (400 MHz, CDCl<sub>3</sub>): δ 8.67 – 8.57 (m, 2H), 7.64 (td, *J* = 7.7, 1.8 Hz, 2H), 7.29 (d, *J* = 7.0 Hz, 2H), 7.22 – 7.14 (m, 4H), 6.74 (td, *J* = 8.3, 4.6 Hz, 3H), 4.85 (s, 4H). <sup>13</sup>C NMR (101 MHz, CDCl<sub>3</sub>): δ 158.85, 149.73, 148.20, 136.85, 129.31, 122.04, 120.81, 117.22, 112.51, 57.30.

**(45) N-methyl-N-(pyridin-2-ylmethyl)aniline<sup>18</sup>**

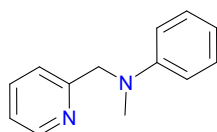

To a mixture of *N*-(pyridin-2-ylmethyl)aniline (550 mg, 0.3 mmol), 40% formaldehyde (3.75 g, 50



mmol) and ethylic acid (4.5 mL) was added CH<sub>3</sub>CN (15 mL). The mixture was vigorously stirred at RT for 24 h. NaBH<sub>4</sub> (52 mg, 1.39 mmol) was added in two batches between an interval of 30 mins in an ice bath. After the addition of NaBH<sub>4</sub> was completed, the mixture was stirred for an additional 2 h and at RT for 24 h. The solution was then diluted with water (20 mL) and extracted with CH<sub>2</sub>Cl<sub>2</sub> (3×20 mL). The organic layer was combined and dried with anhydrous Na<sub>2</sub>SO<sub>4</sub>. Solvent was removed under reduced pressure, and the crude product was purified by on a silica column eluted with petroleum ether/EtOAc (5:1 v/v) to provide product as a white solid (66% yield). <sup>1</sup>H NMR (400 MHz, CDCl<sub>3</sub>) δ 8.61 (dd, *J* = 4.1, 0.8 Hz, 1H), 7.62 (td, *J* = 7.7, 1.8 Hz, 1H), 7.28 – 7.16 (m, 4H), 6.83 – 6.71 (m, 3H), 4.68 (s, 2H), 3.14 (s, 3H). <sup>13</sup>C NMR (101 MHz, CDCl<sub>3</sub>): δ 159.42, 149.56, 149.25, 136.77, 129.24, 121.92, 120.76, 116.71, 112.21, 58.88, 39.09. Anal. Calcd. (%) for C<sub>28</sub>H<sub>30</sub>CuF<sub>6</sub>N<sub>6</sub>O<sub>6</sub>S<sub>2</sub>: C, 42.66; H, 3.84; N, 10.66. Found (%) C, 43.23; H, 3.21; 10.12.

## References

- 1, Q. Li, S-Y. Zhang, G. He, Z. Ai, W. A. Nack, and G. Chen. *Org. Lett.*, **2014**, *16*, 1764–1767.
- 2, S. Cai, C. Chen, P. Shao, and C. Xi. *Org. Lett.*, **2014**, *16*, 3142–3145.
- 3, Á. M. Martínez, N. Rodríguez, R. G. Arrayás and J. C. Carretero. *Chem. Commun.*, **2014**, *50*, 2801-2803.
- 4, T. T. Dang, Y. Zhu, J. S. Y. Ngiam, S. C. Ghosh, A. Chen, and A. M. Seayad, *ACS Catal.*, **2013**, *3*, 1406–1410.
- 5, M. C. Law, T. W. Cheung, K.-Y. Wong, and T. H. Chan, *J. Org. Chem.*, **2007**, *72*, 923–929.
- 6, K. Sreenath, Z. Yuan, M. Macias-Contreras, V. Ramachandran, R. J. Clark, and L. Zhu, *Eur. J. Inorg. Chem.* **2016**, 3728.
- 7, Y. Zhou, L. Li, H. Ye, L. Zhang, and L. You, *J. Am. Chem. Soc.*, **2016**, *138*, 381–389.
- 8, Y. Chai, S. Shen, G. Weng and Y. Pan, *Chem. Commun.*, **2014**, *50*, 11668-11671.
- 9, P. Harding, D. J. Harding , N. Soponrat , K. Tinpun , S.Samuadnuan and H. Adams, *Aust. J. Chem.*, **2010**, *63*, 75- 82.
- 10, Y. Chai, S. Shen, G. Weng and Y. Pan. *Chem. Commun.*, 2014, *50*, 11668-11671.
- 11, M. Mastalir, G. Tomsu, E. Pittenauer, G. Allmaier, and K. Kirchner. *Org. Lett.*, **2016**, *18*, 3462–3465.
- 12, S. S. Kampmann, B. W. Skelton, D. A. Wild, G. A. Koutsantonis, and S. G. Stewart. *Eur. J. Org. Chem.*, **2015**, *27*, 5995 – 6004.
- 13, H.-M. Li, C. Xu, Z.-Q. Wang and W.-J. Fu, *Bull. Korean Chem.Soc*, **2015**, *36*, 2557-2560.
- 14, Y.-C. Lin, K.-H. Yu, S.-L. Huang, Y-H. Liu, Y. Wang, S.-T. Liu and J. T. Chen. *Dalton Trans.*, **2009**, *41*, 9058-9067.
- 15, V. V. Kouznetsov, L. Y. V. Me´ndez, M. Sortino, Y. Va´squez, M. P. Gupta, M. Freile, R. D. Enrize and S. A. Zacchino, *Bioorg. Med. Chem.*, **2008**, *16*, 794-809.
- 16, H.-R. Pan, Y-J. Li, C-X. Yan, J. Xing, and Y. Cheng. *J. Org. Chem.*, **2010**, *75*, 6644–6652.
- 17, X. Peng, J. Du, J. Fan, J. Wang, Y. Wu, J. Zhao, S. Sun and T. Xu, *J. Am. Chem. Soc.*, **2007**, *129*, 1500–1501.
- 18, Y. Gui, L.-L. Liao, L. Sun, Z. Zhang, J.-H. Ye, G. Shen, Z.-P. Lu, W.-J. Zhou and D.-G. Yu, *Chem. Commun.*, **2017**, *53*, 1192-1195.

## NMR and Mass spectra

# N-phenylpicolinamide

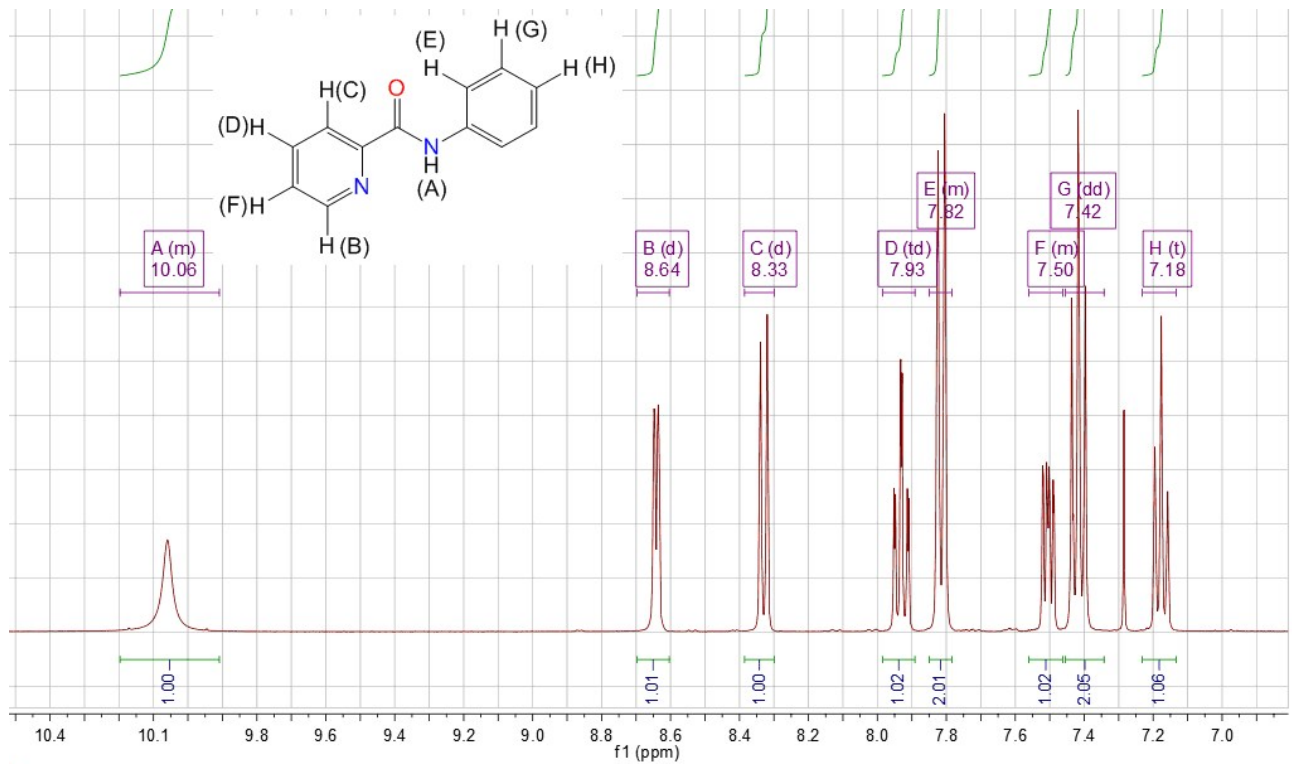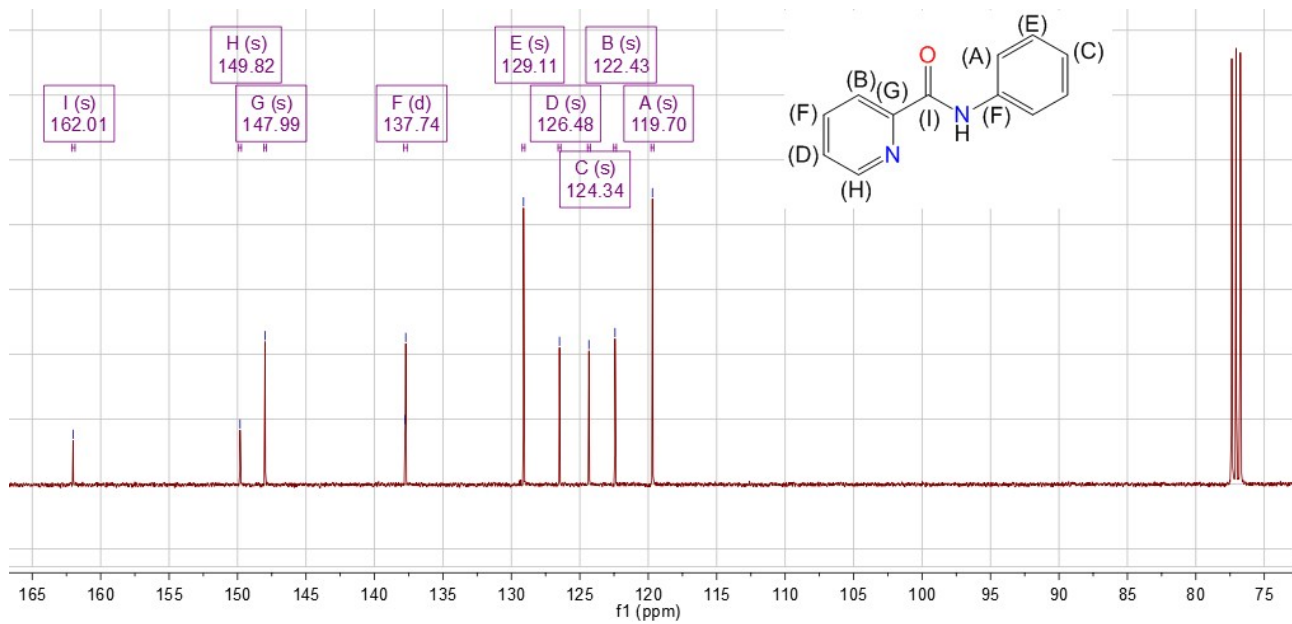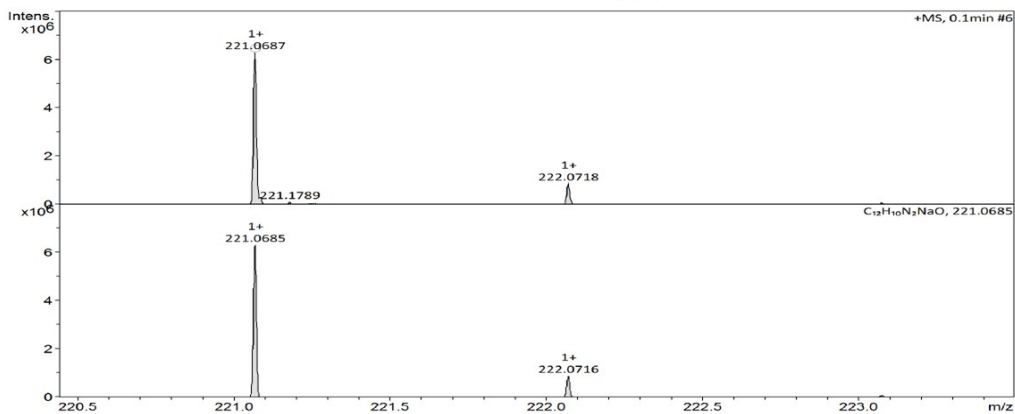

# N-(p-tolyl)picolinamide

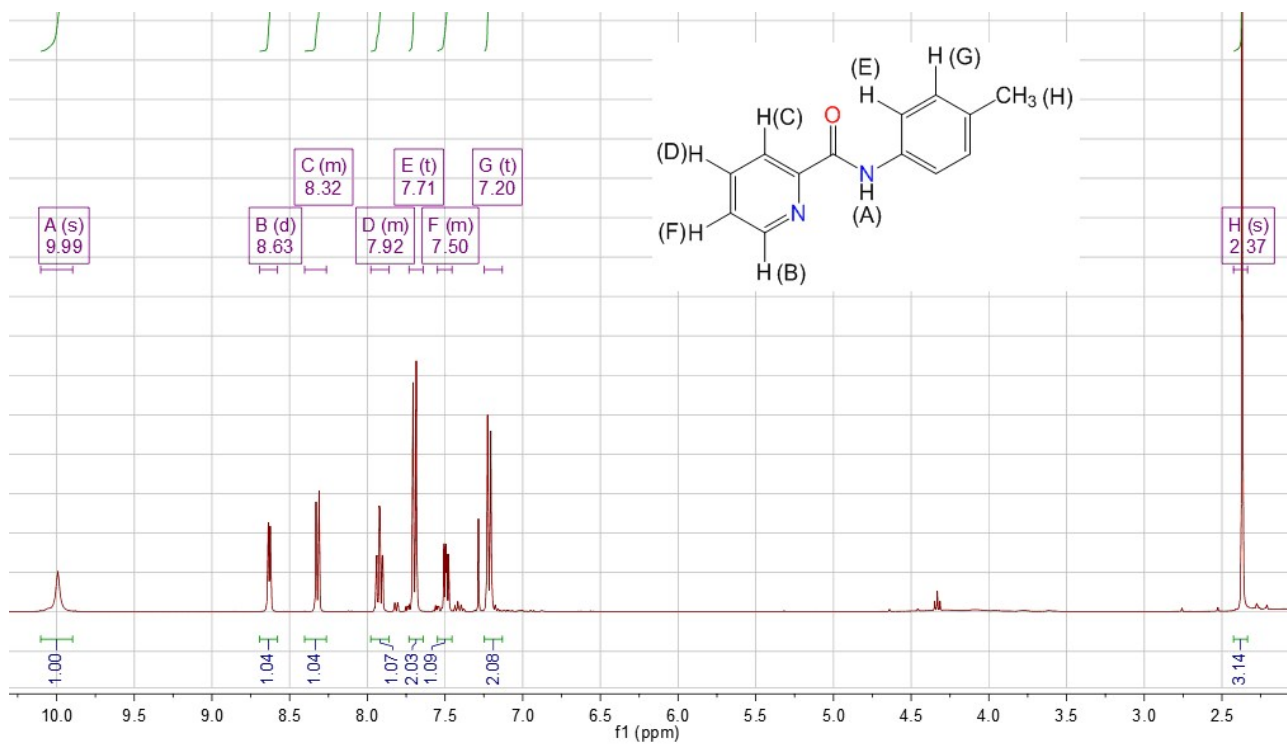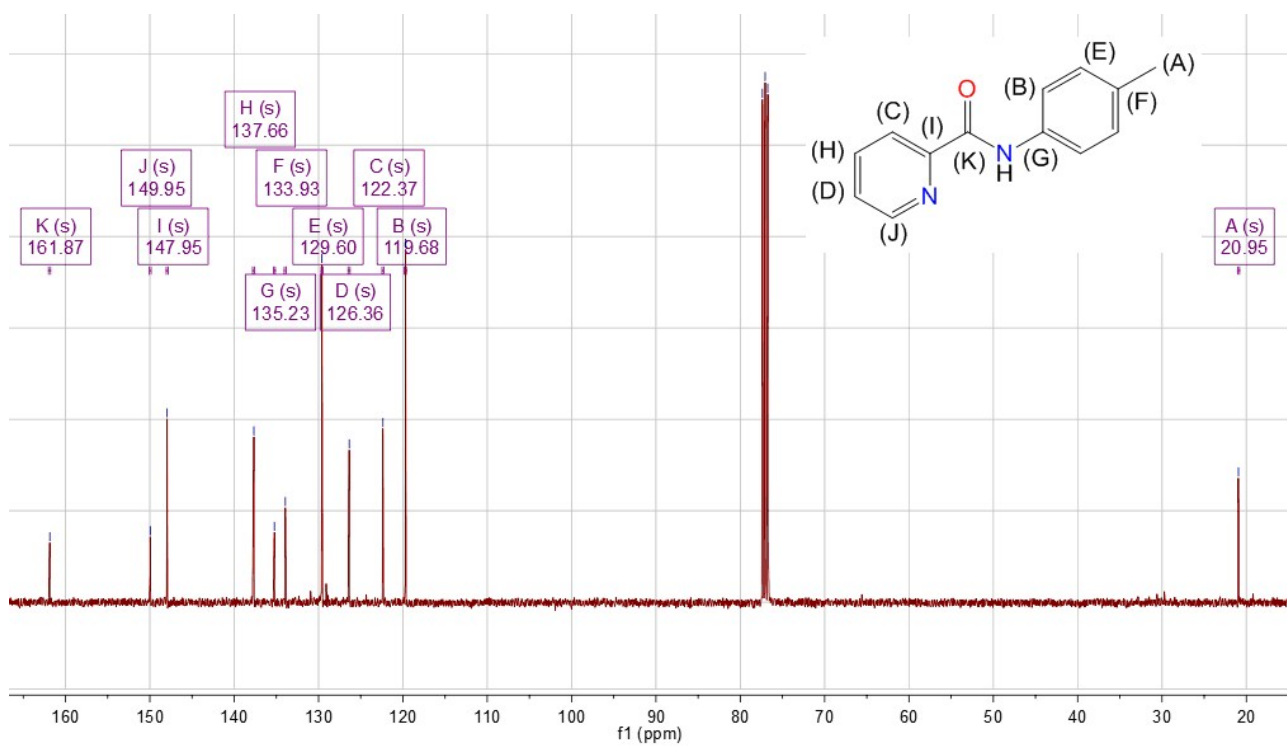

N-(m-tolyl)picolinamide

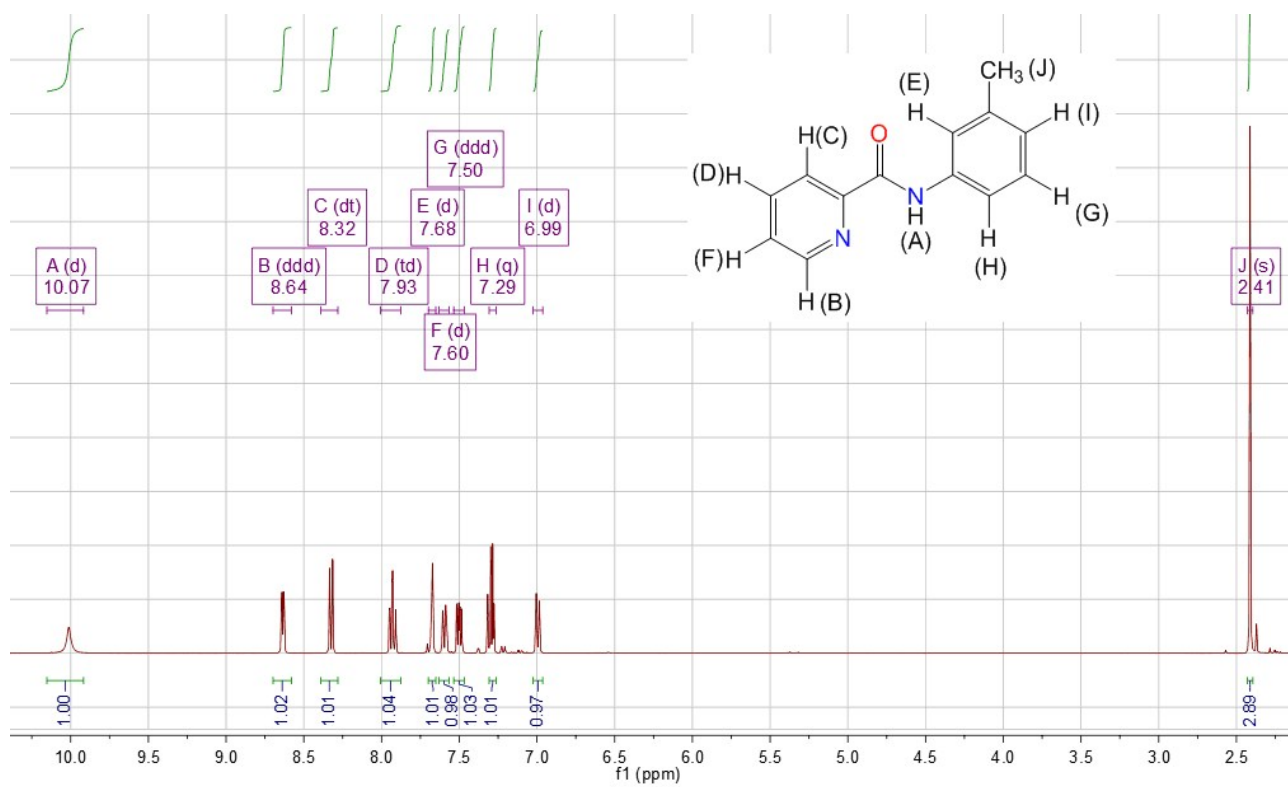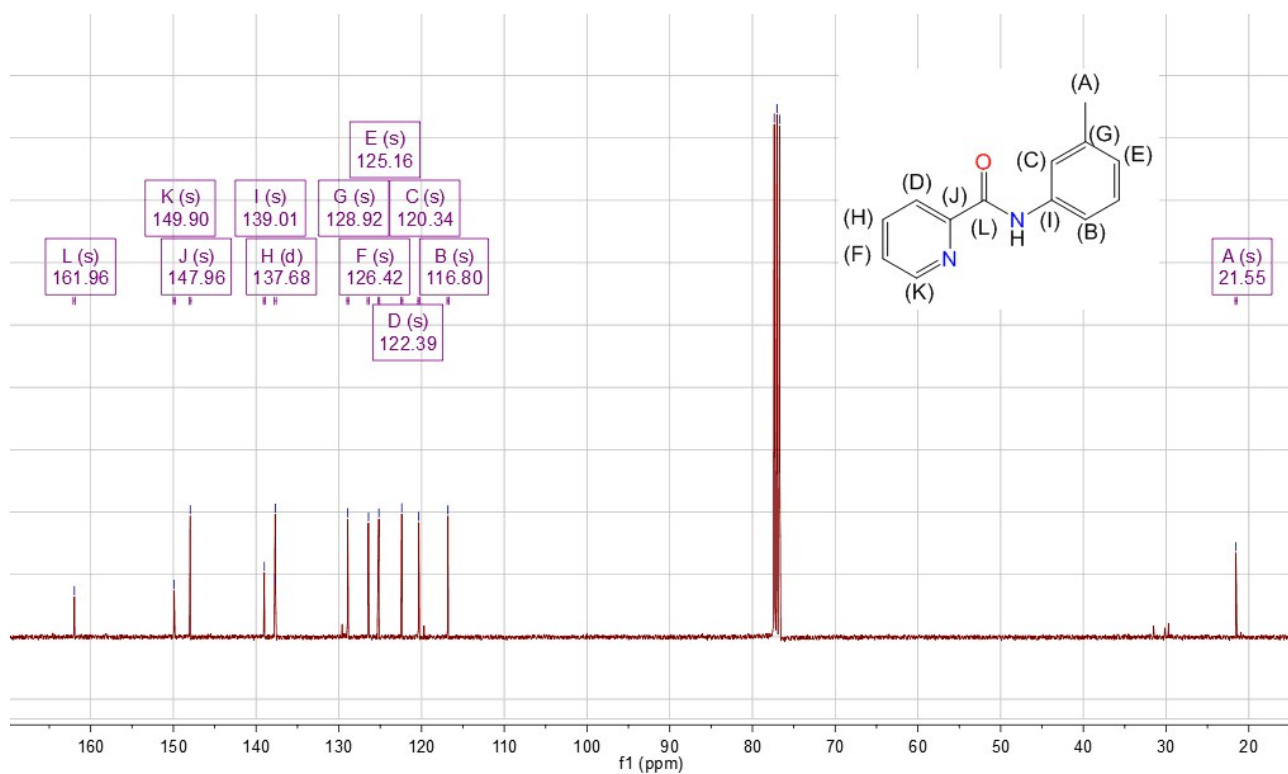

N-(o-tolyl)picolinamide

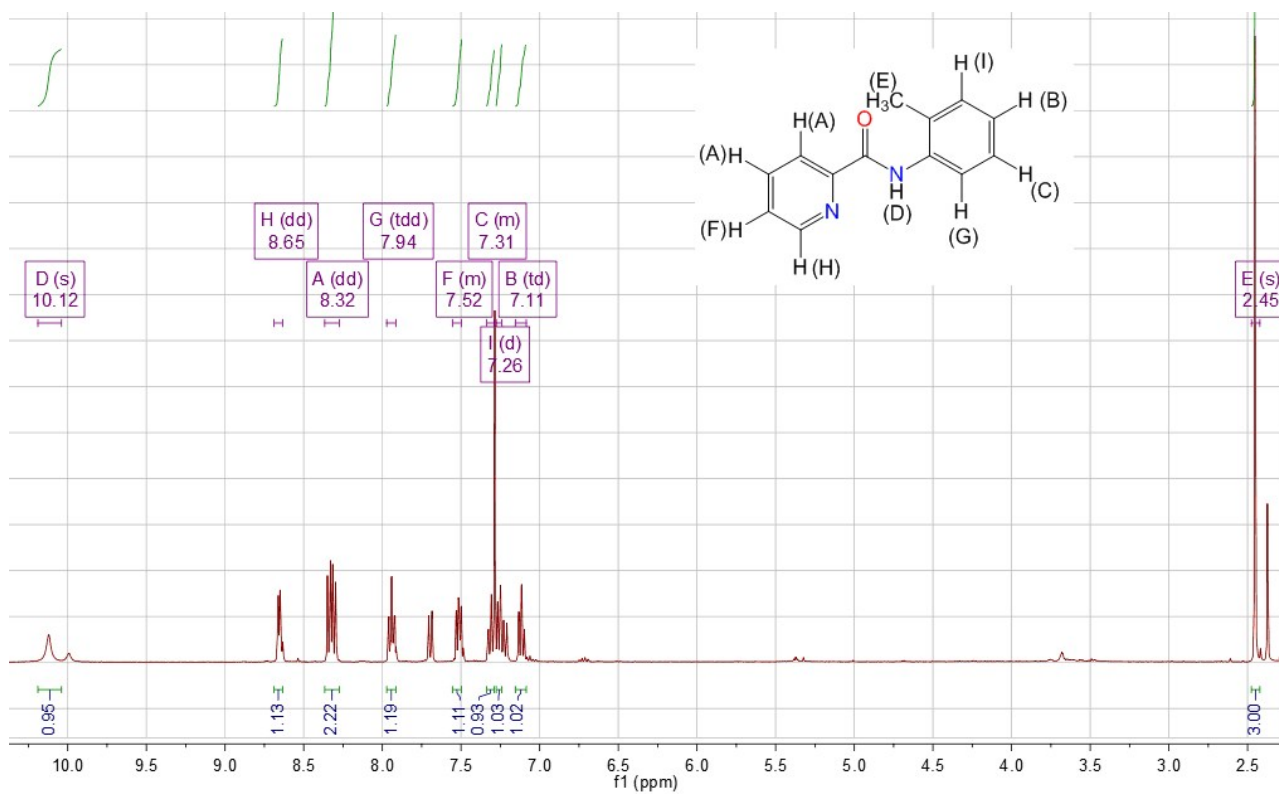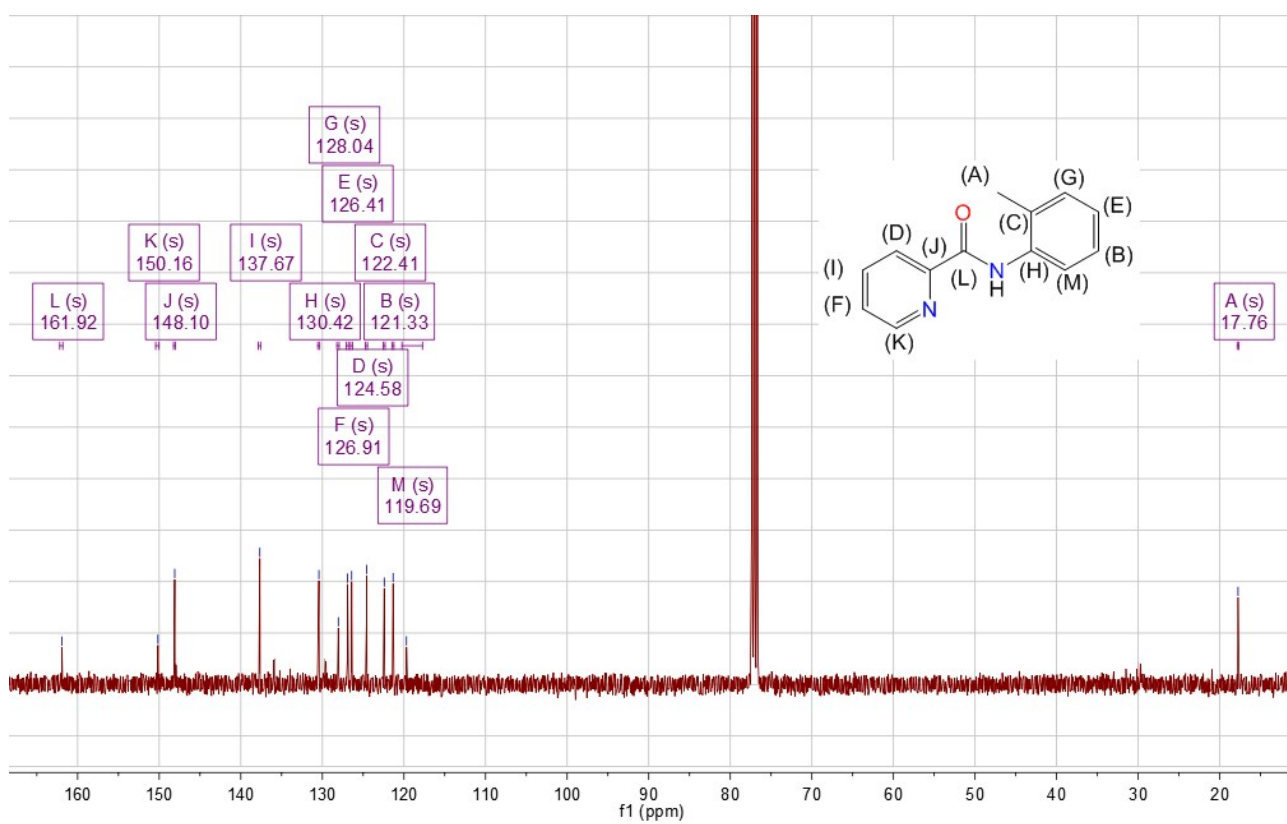

N-(2,6-dimethylphenyl)picolinamide

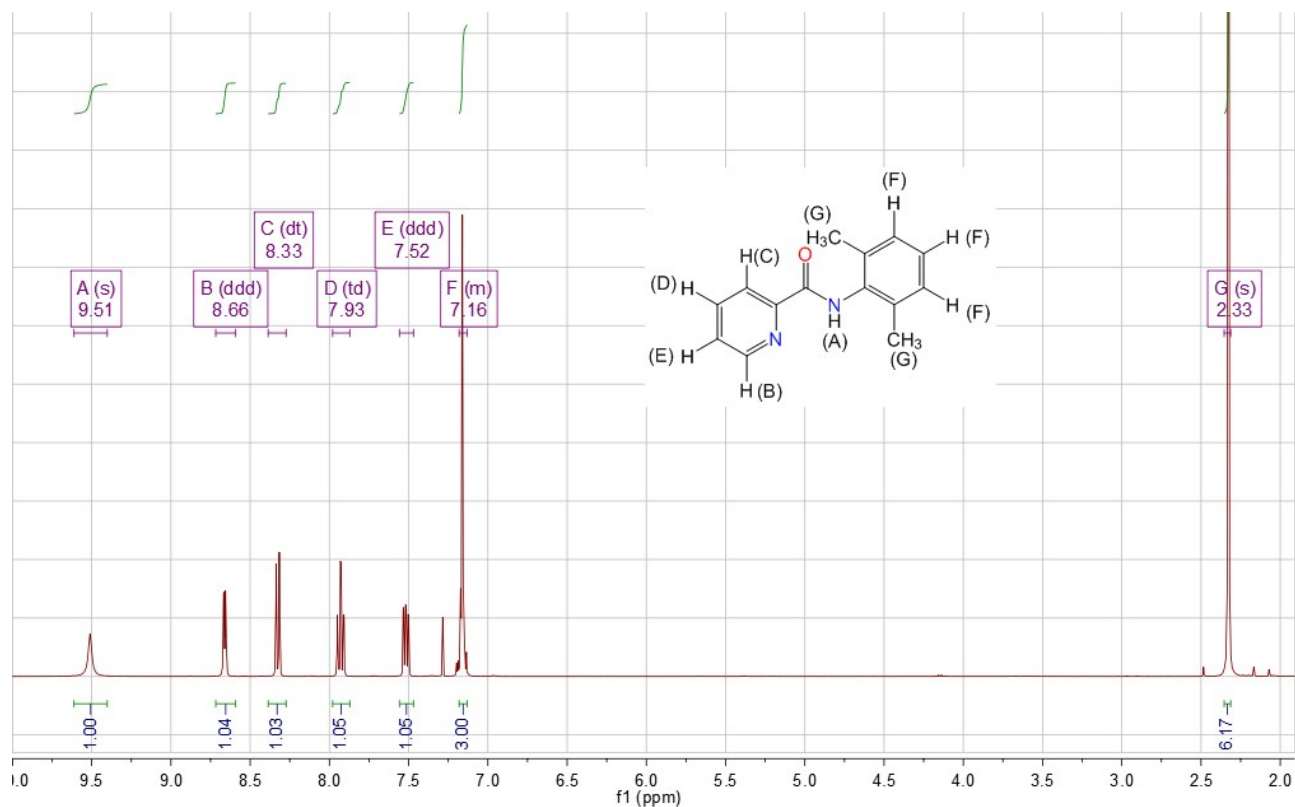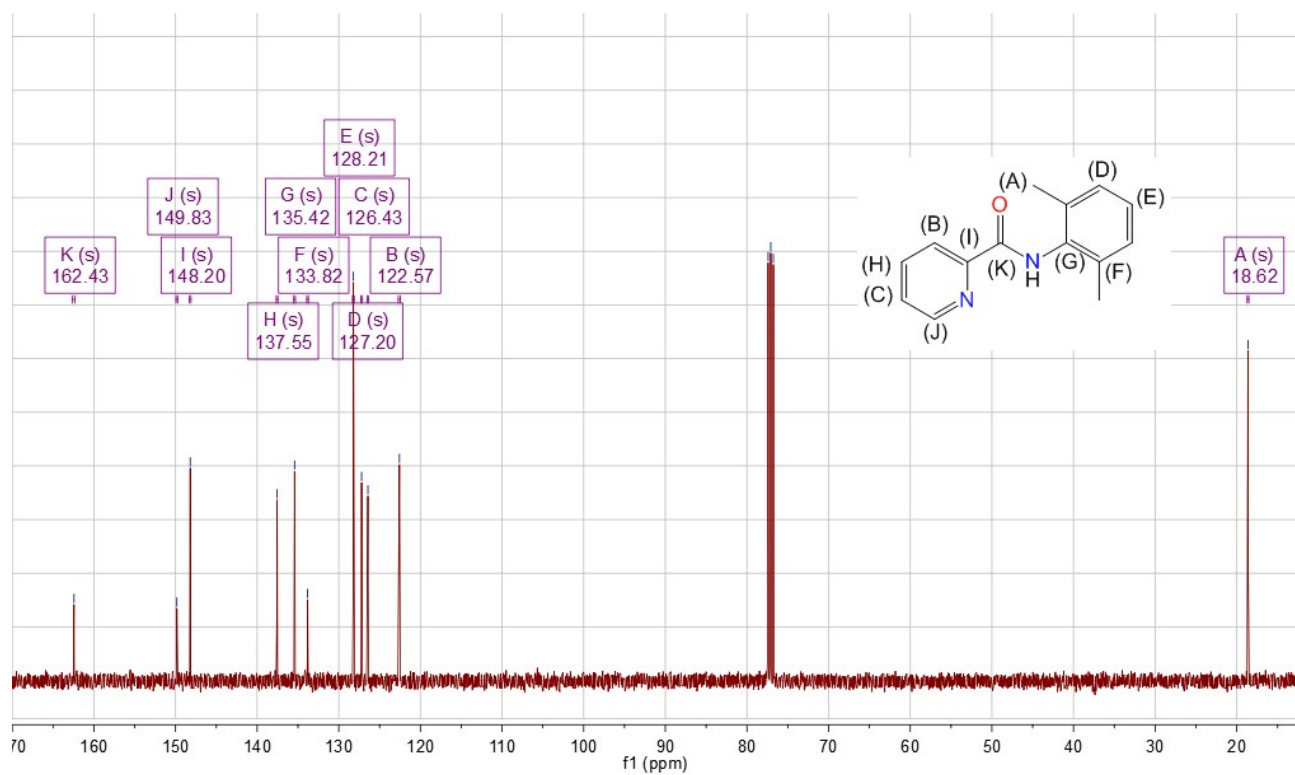

N-(4-ethylphenyl)picolinamide

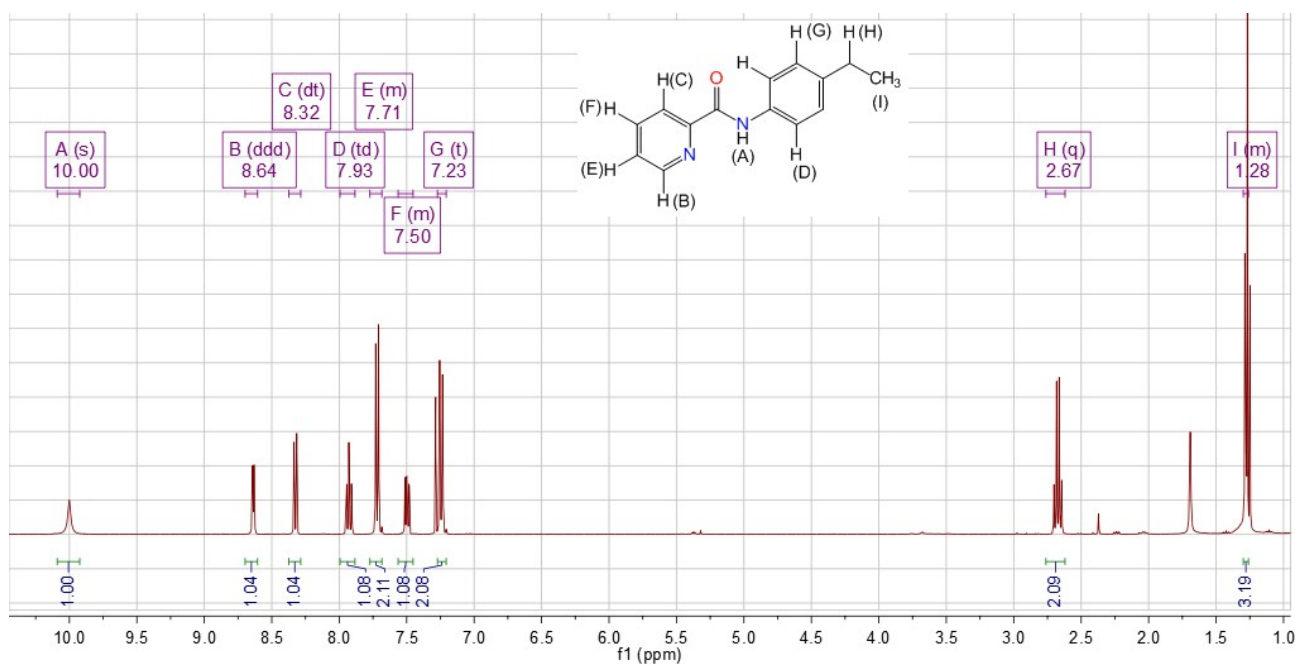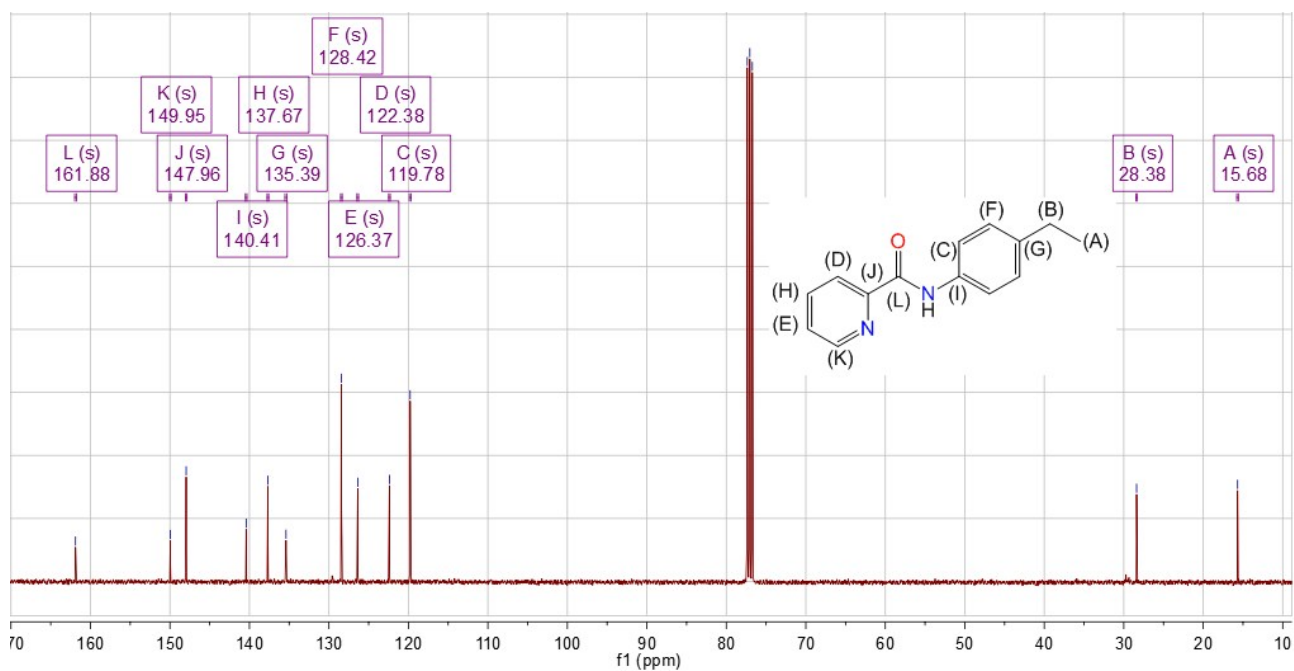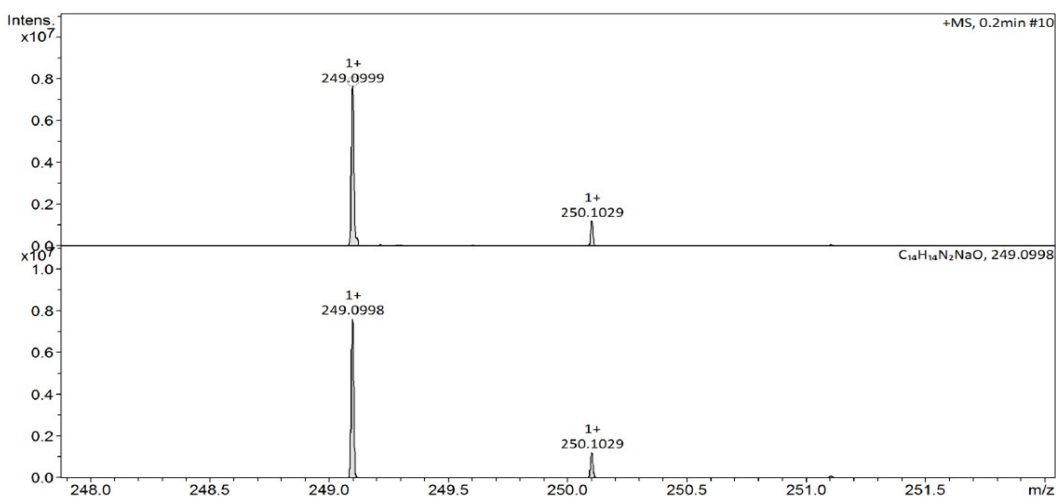

N-(4-methoxyphenyl)picolinamide

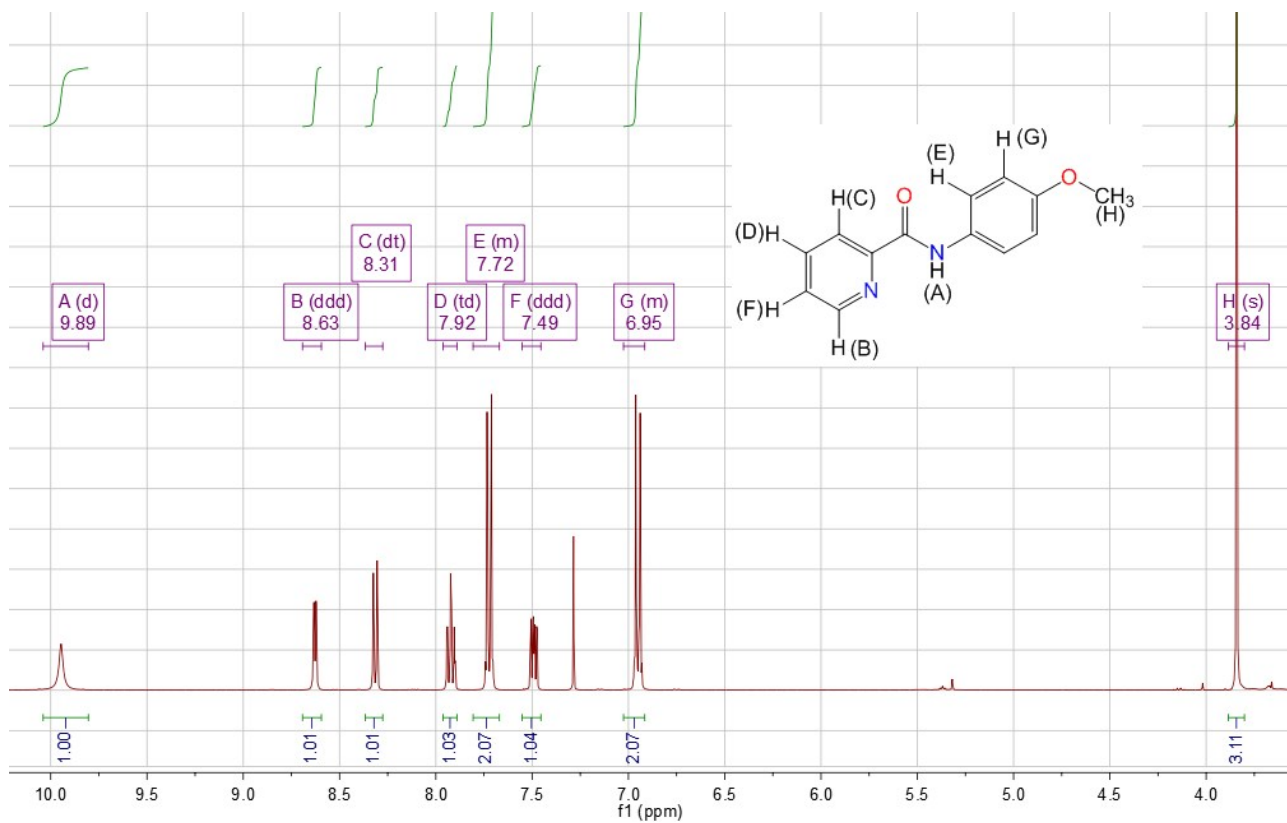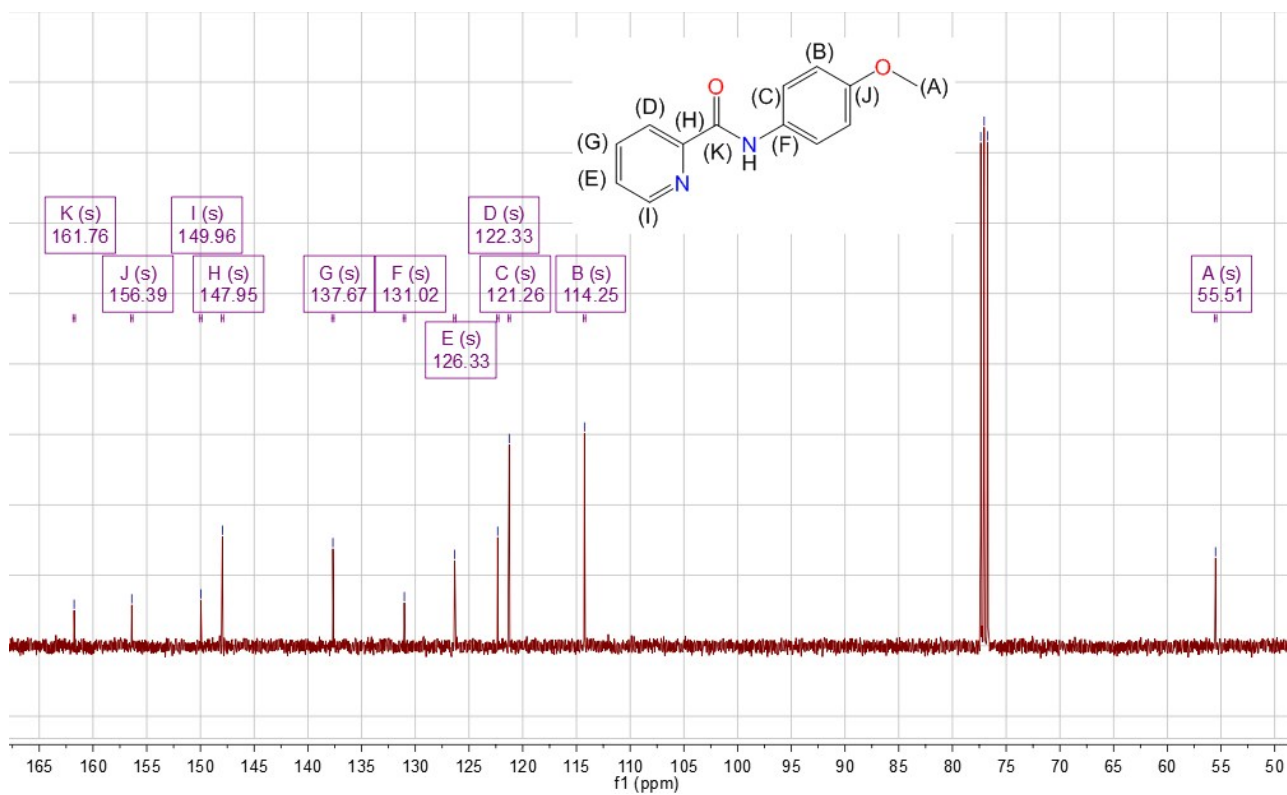

N-(4-iodophenyl)picolinamide



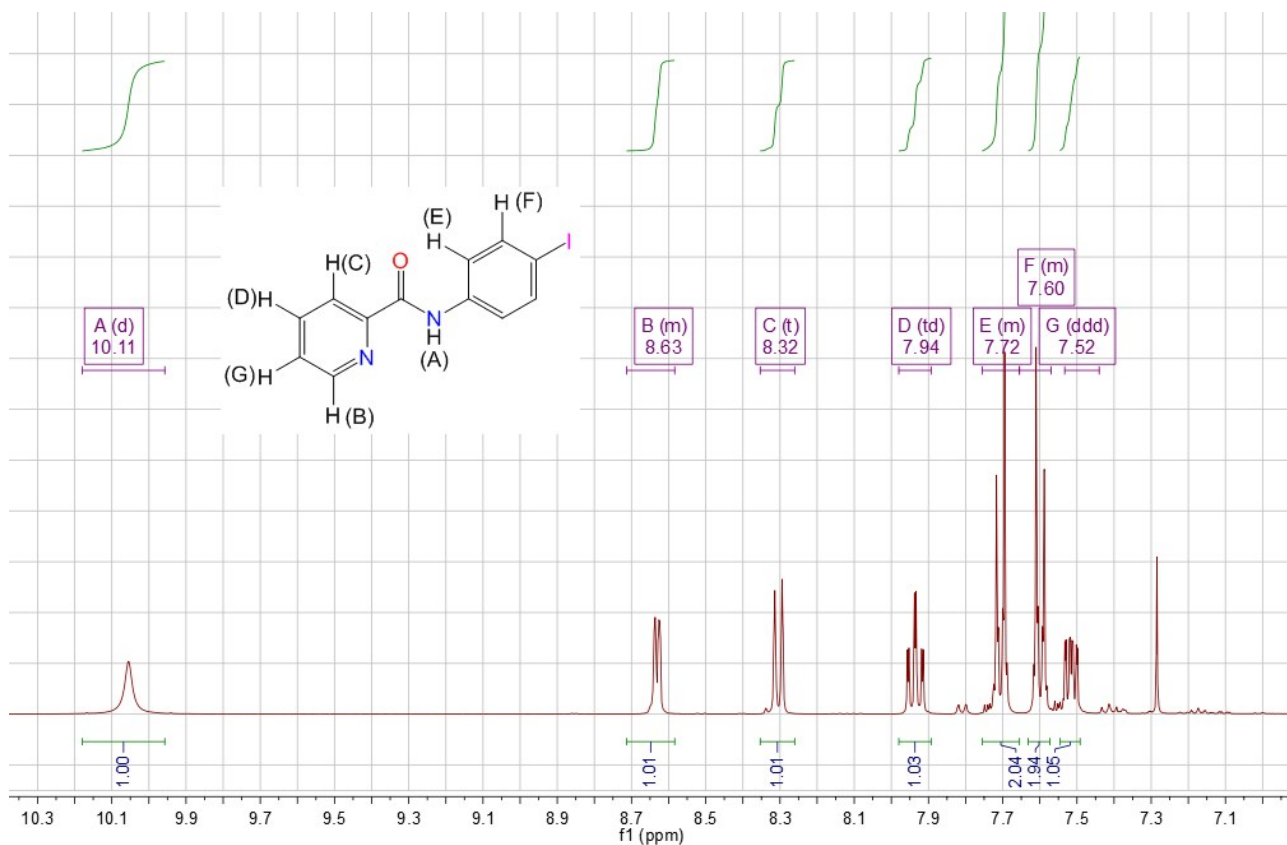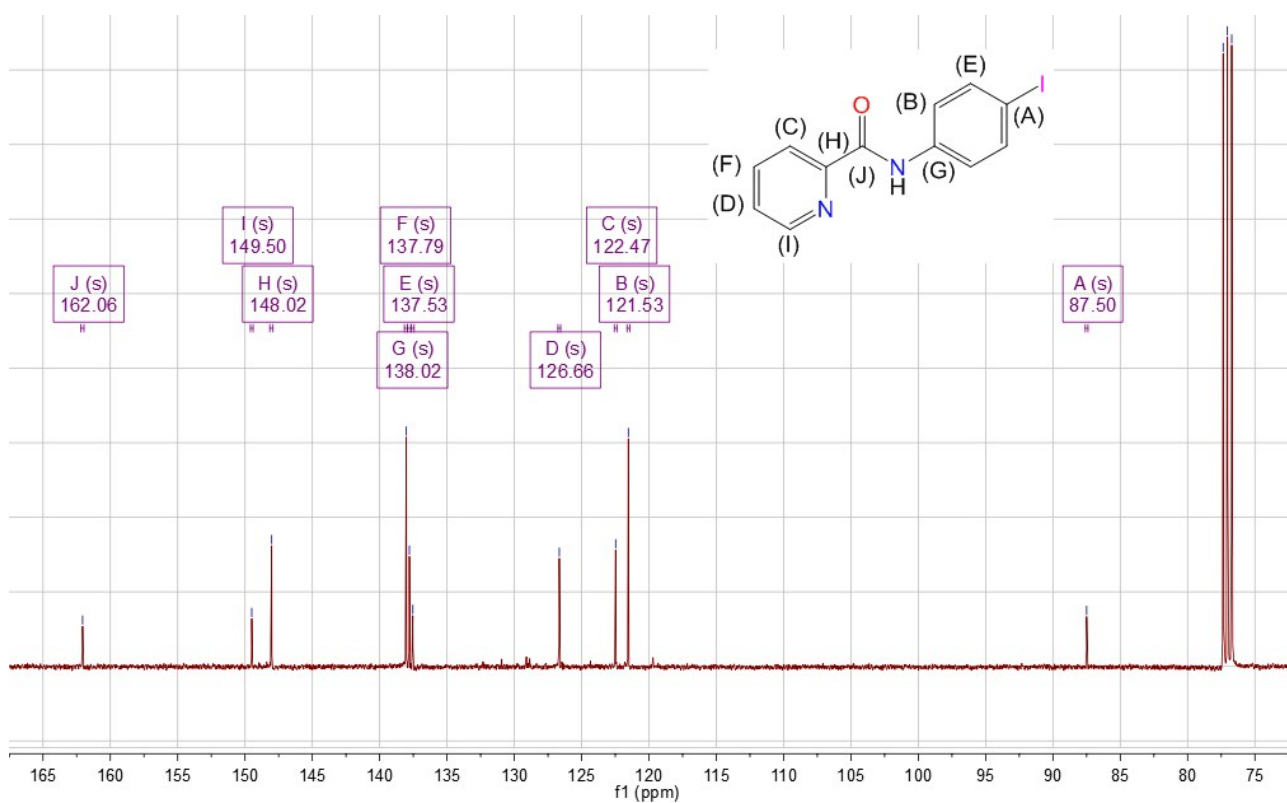

N-(4-(trifluoromethyl)phenyl)picolinamide

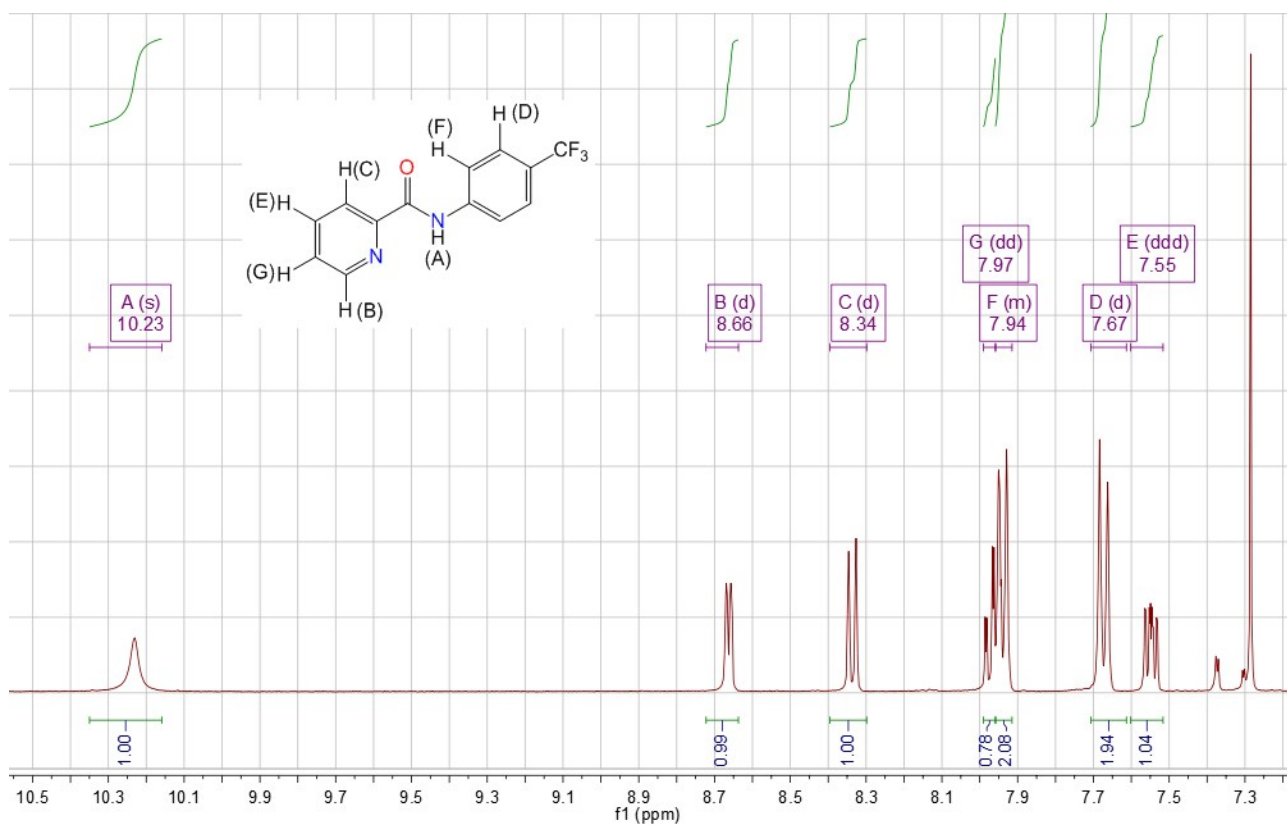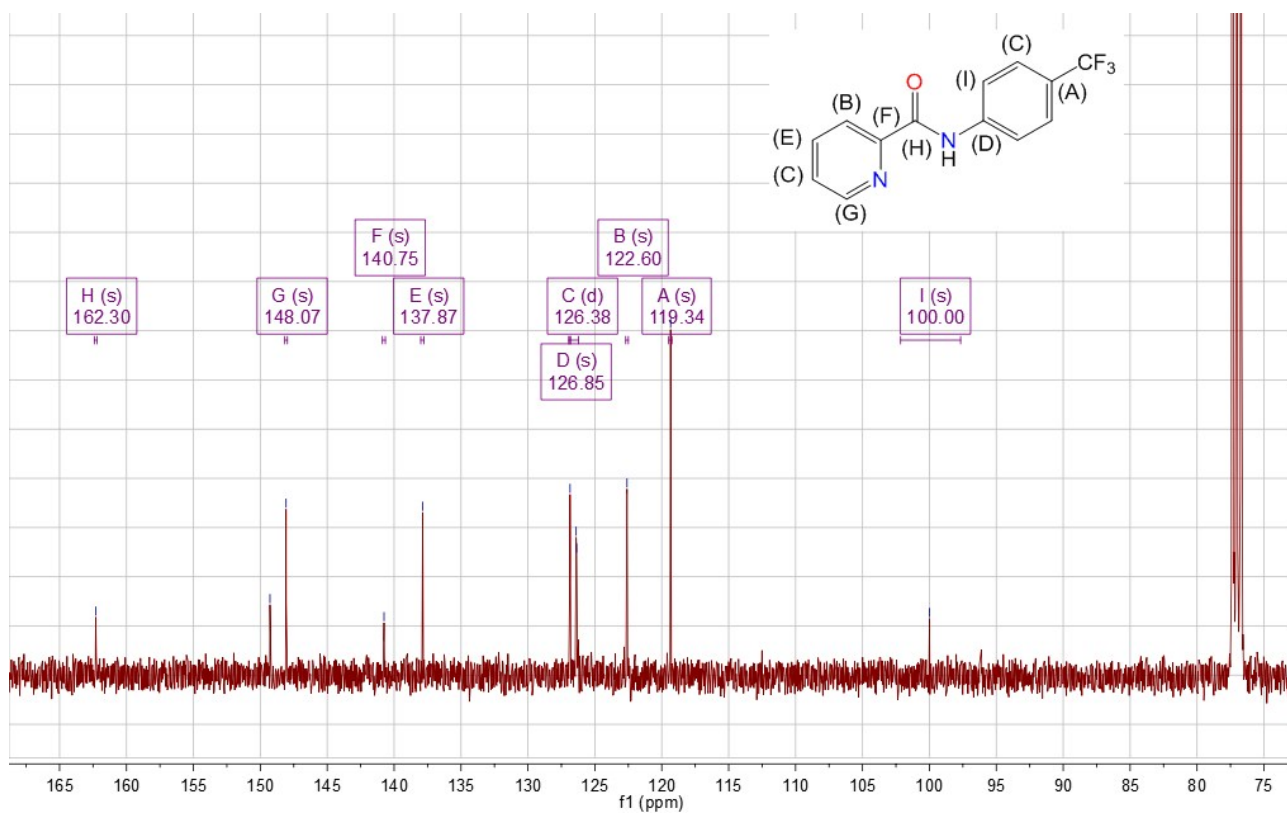

N-(4-benzoylphenyl)picolinamide

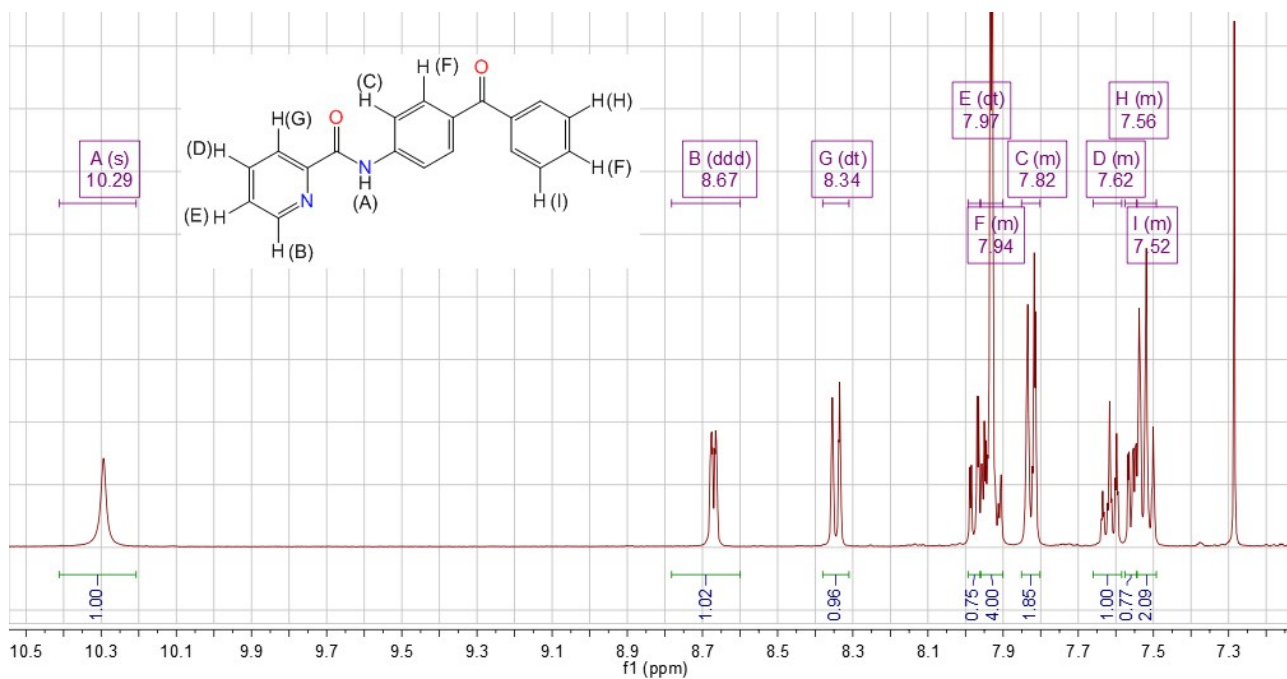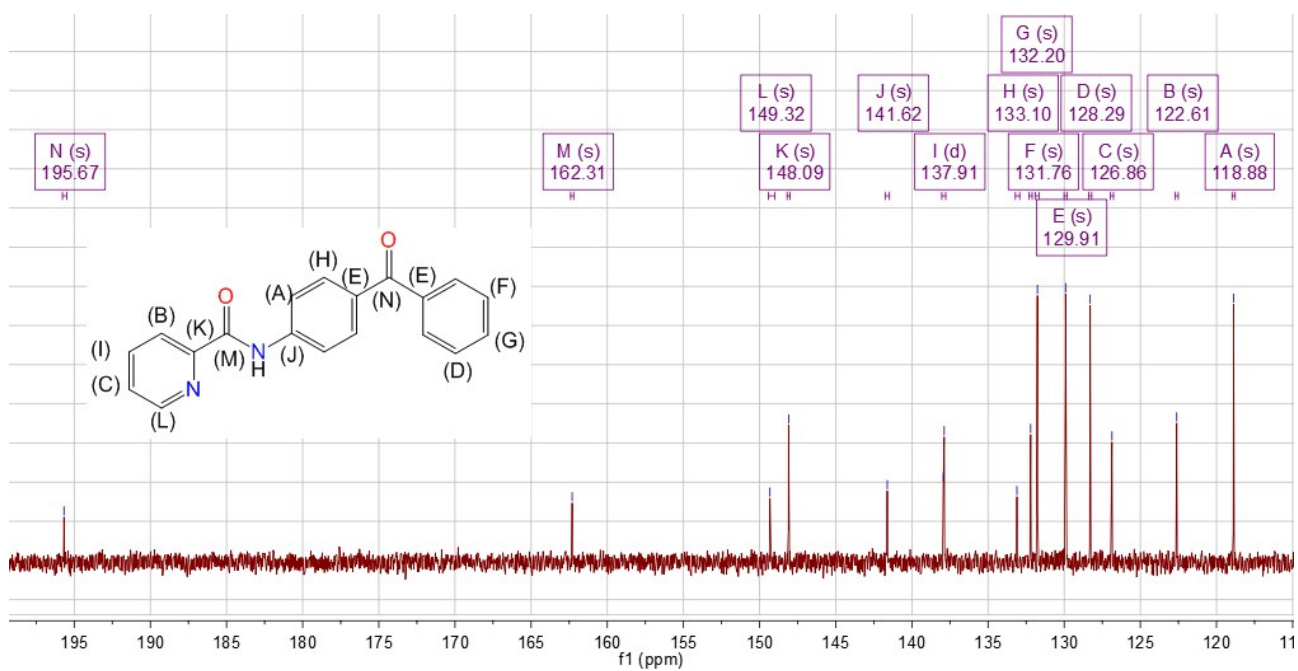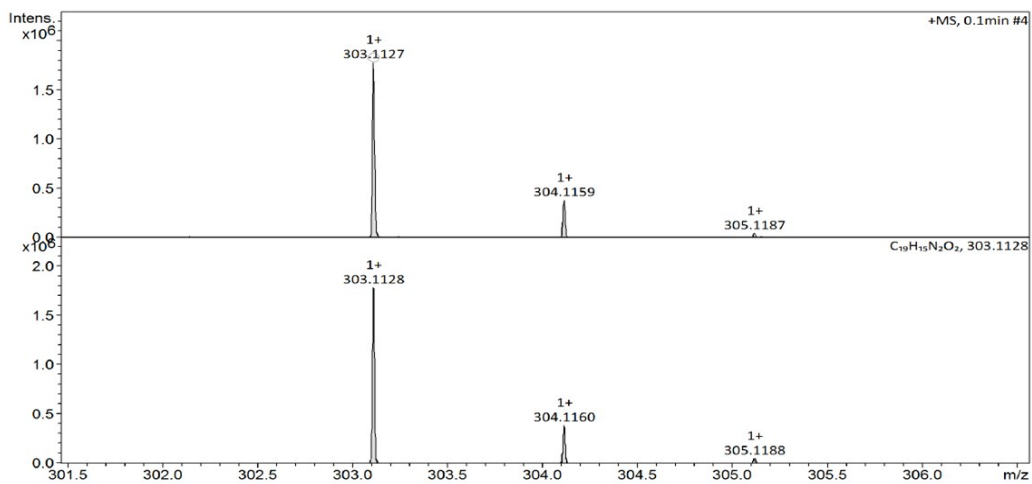

11, 4-chloro-N-phenylpicolinamide

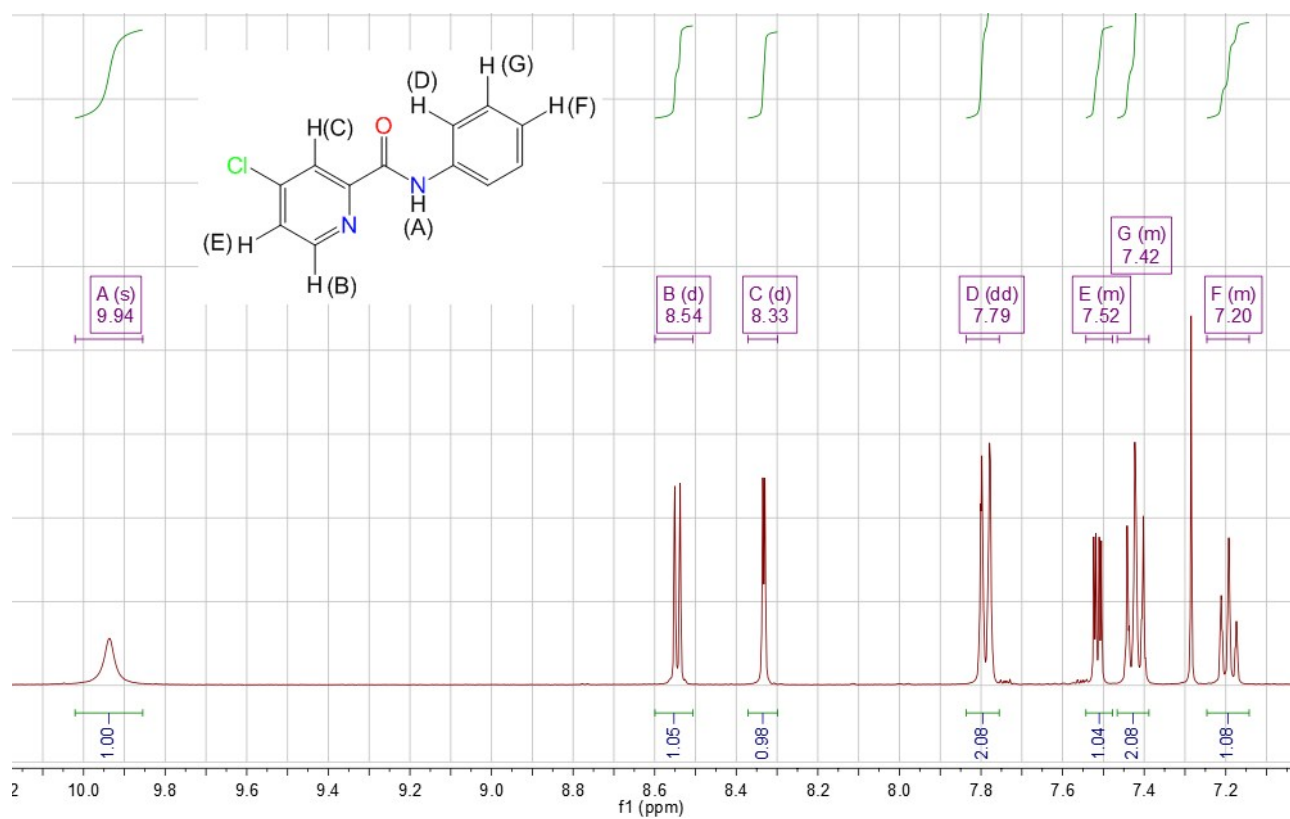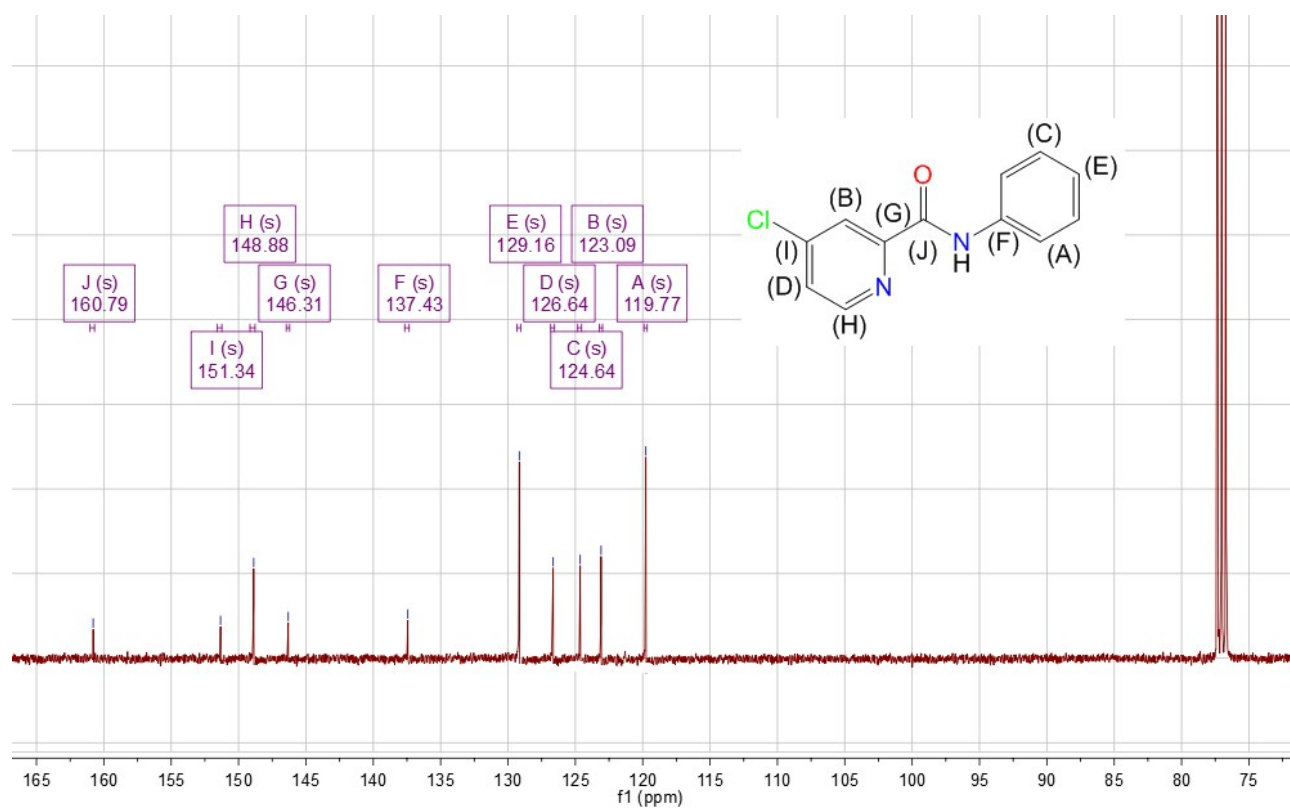

4-(3-methoxypropoxy)-3-methyl-N-(p-tolyl)picolinamide

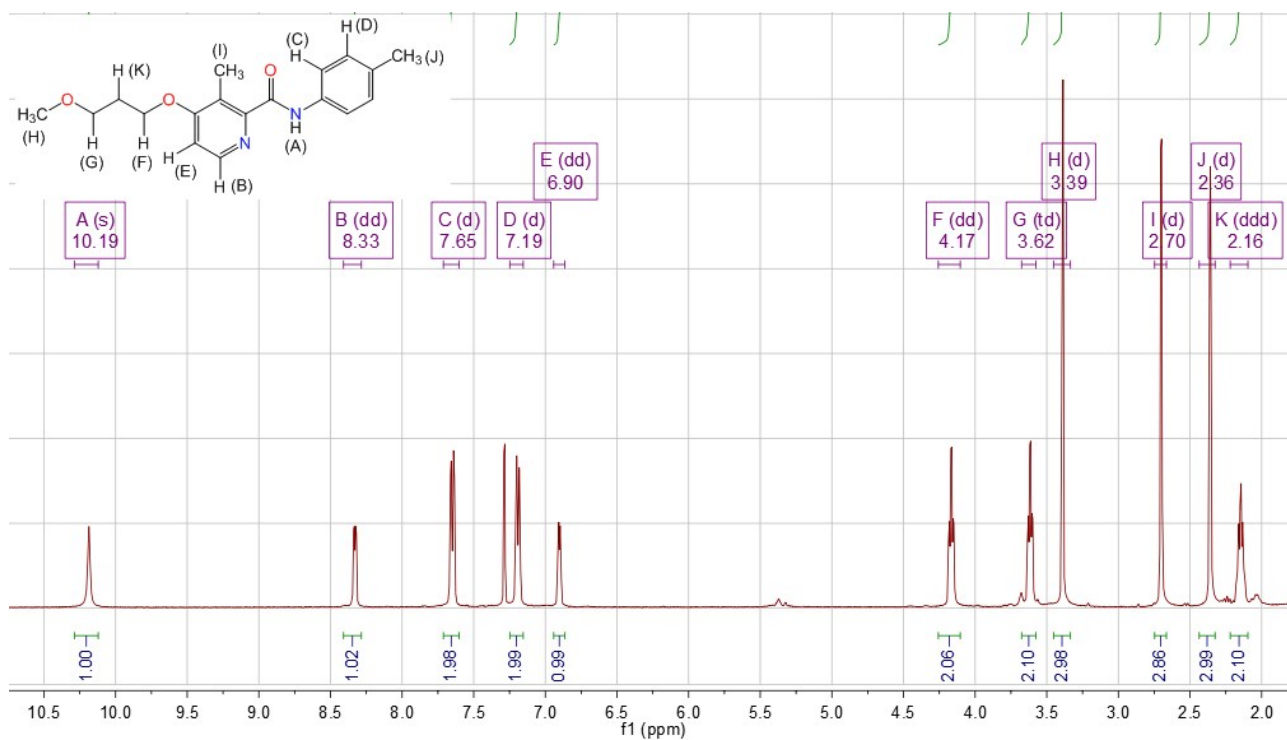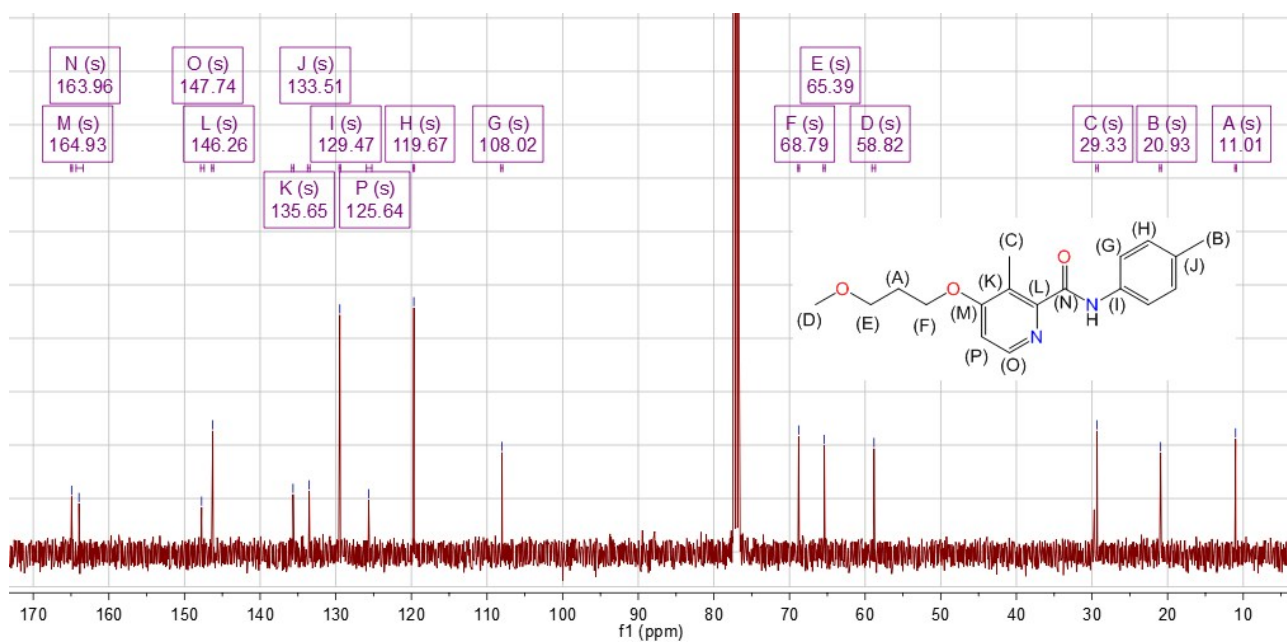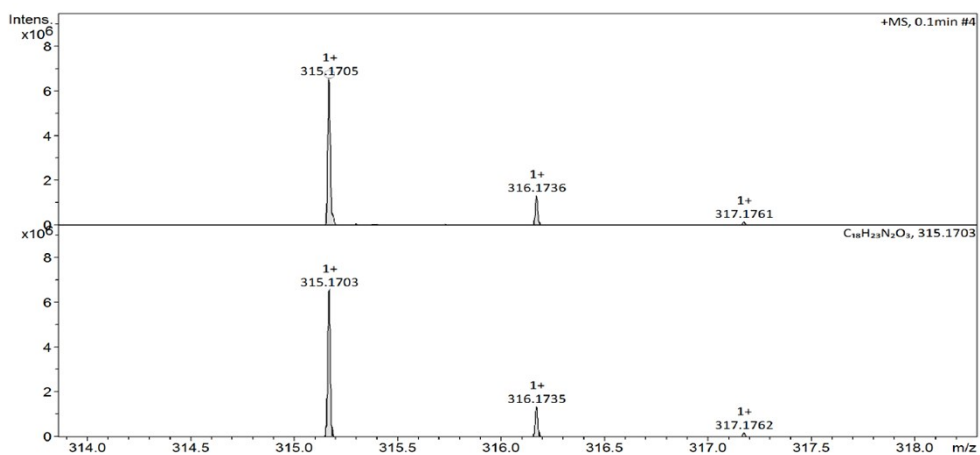

3-methyl-N-(p-tolyl)-4-(2,2,2-trifluoroethoxy)picolinamide

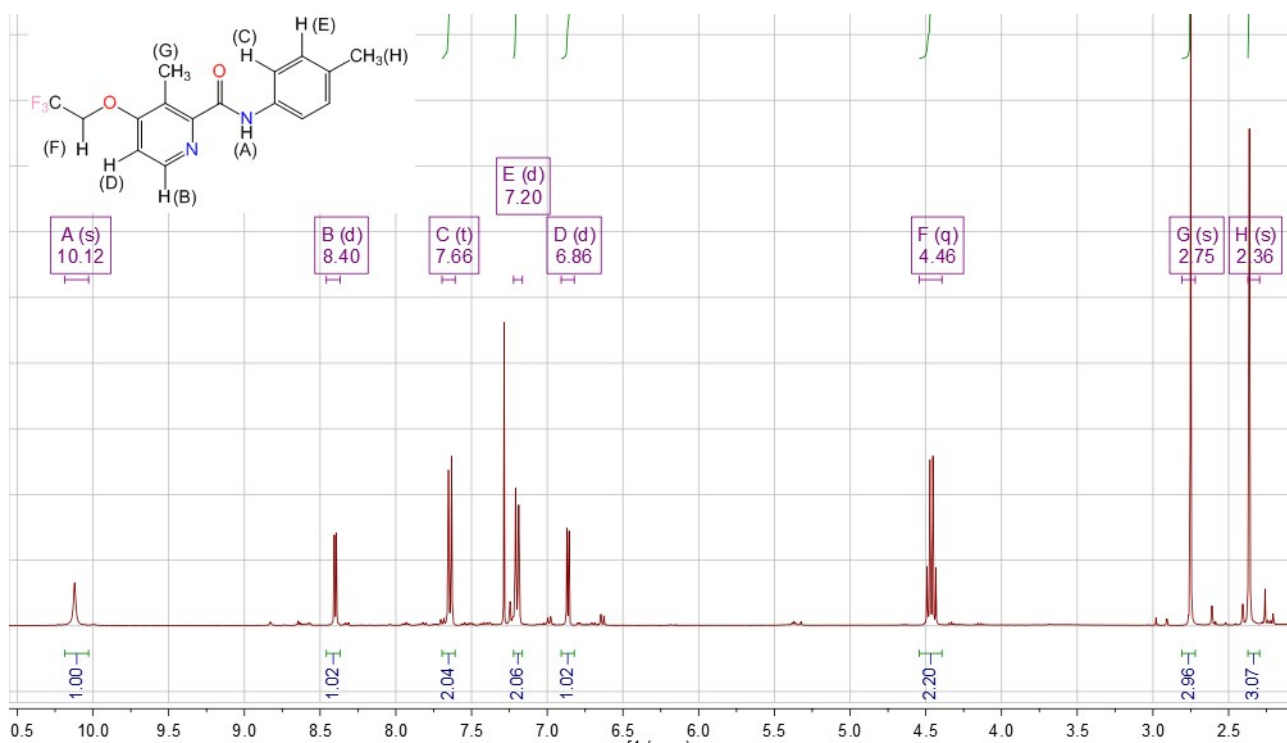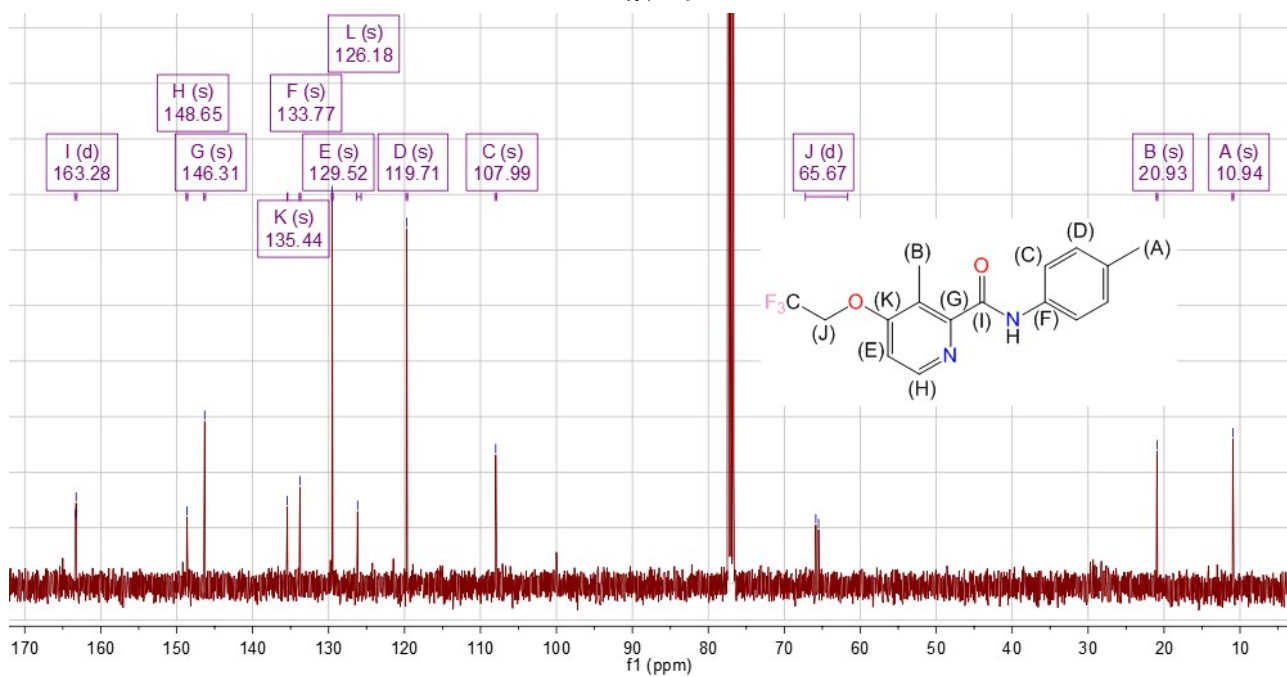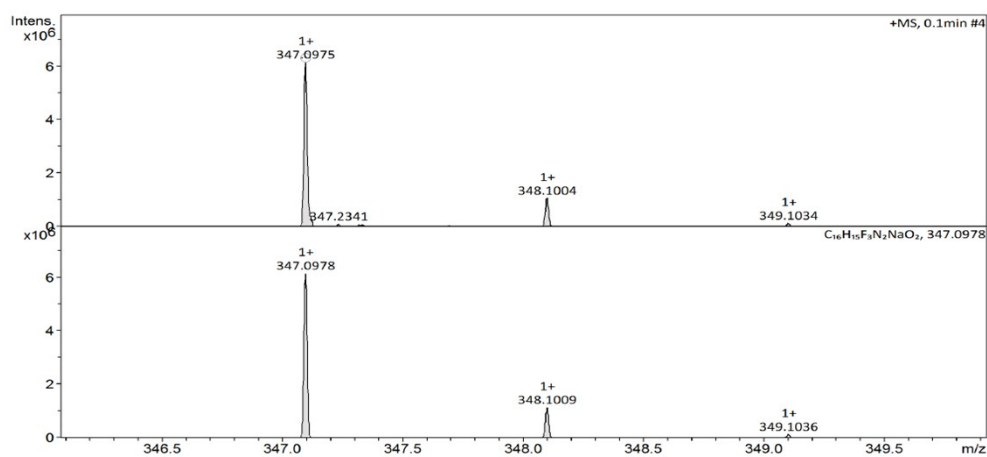

4-methoxy-3,5-dimethyl-N-(p-tolyl)picolinamide

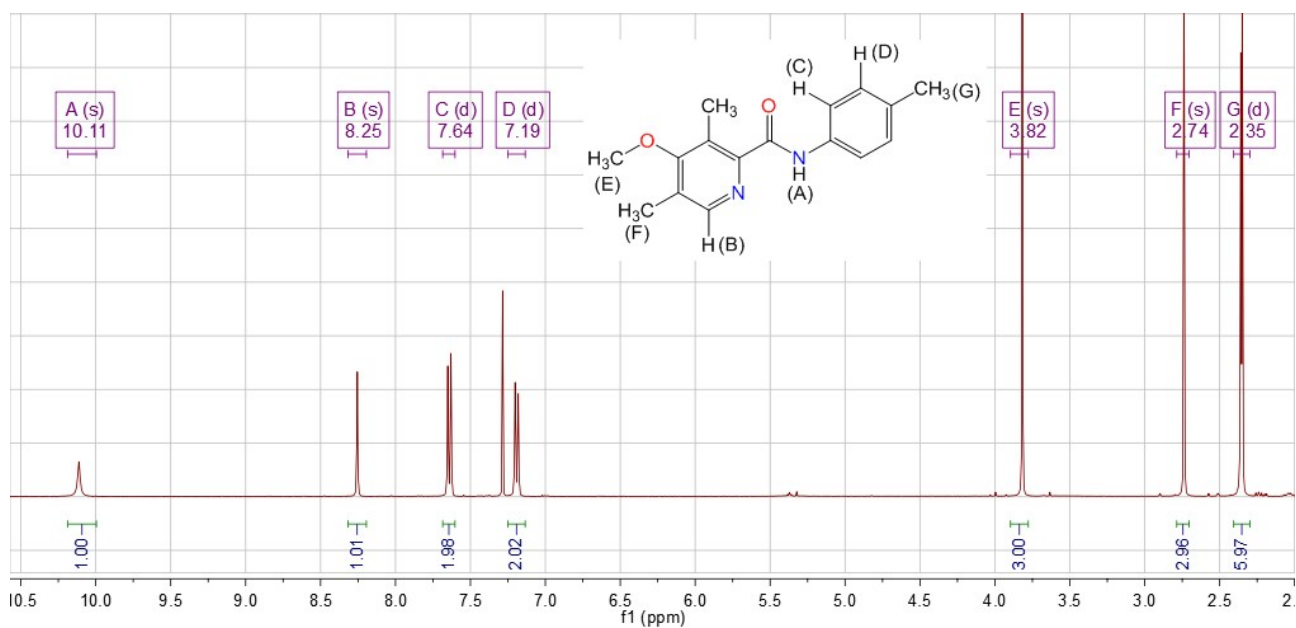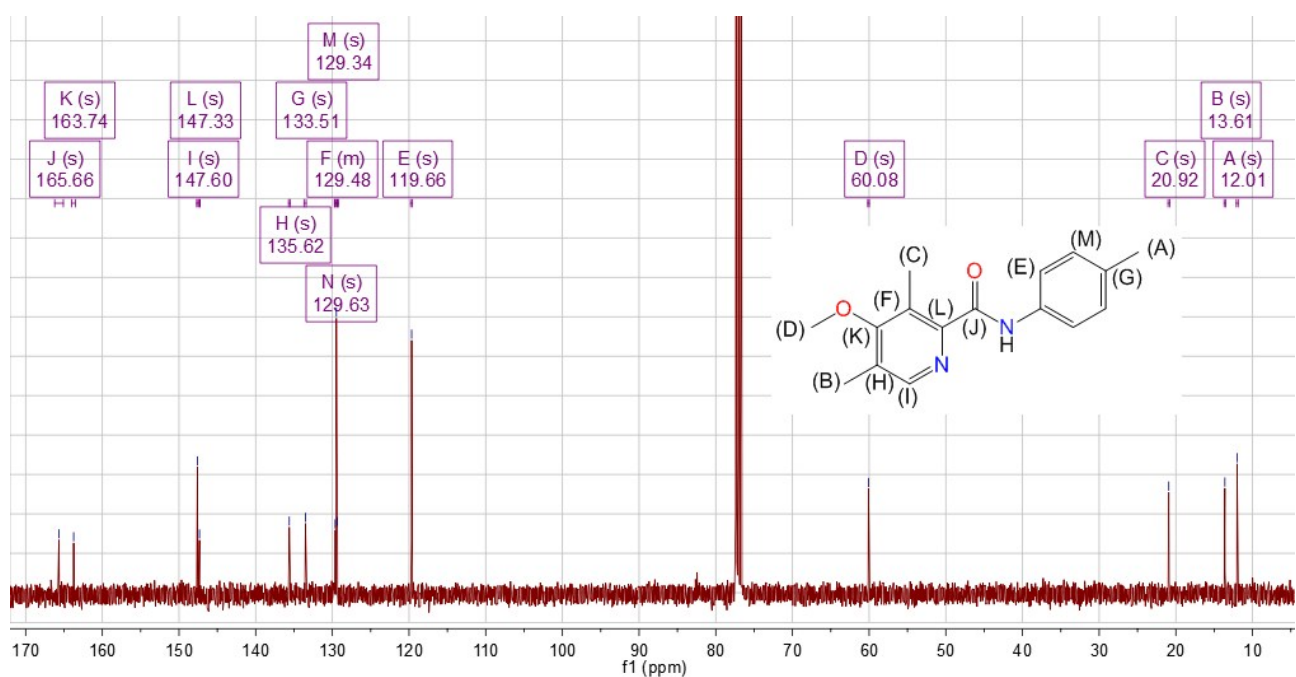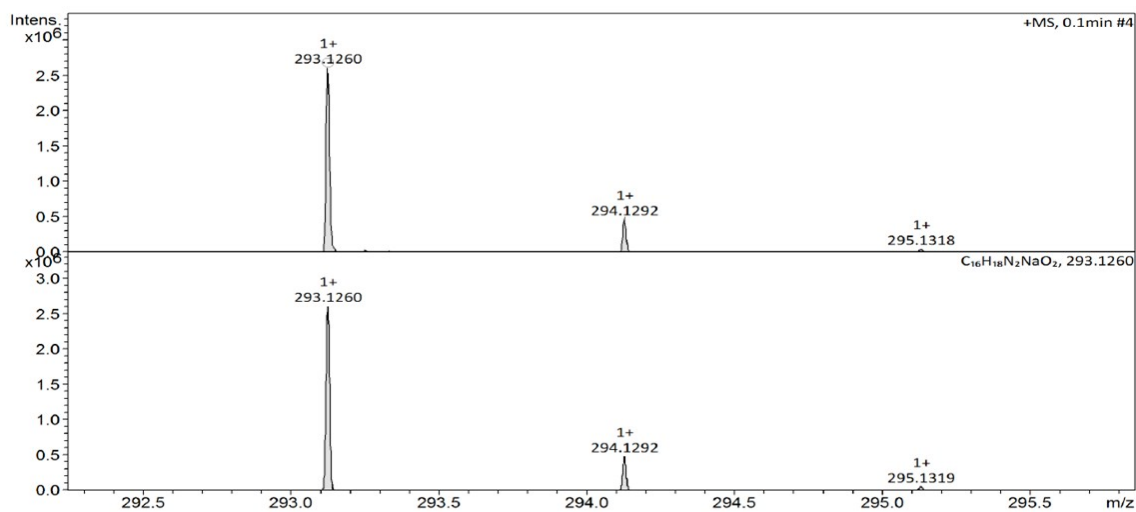

*N*-(pyridin-2-ylmethylene)aniline

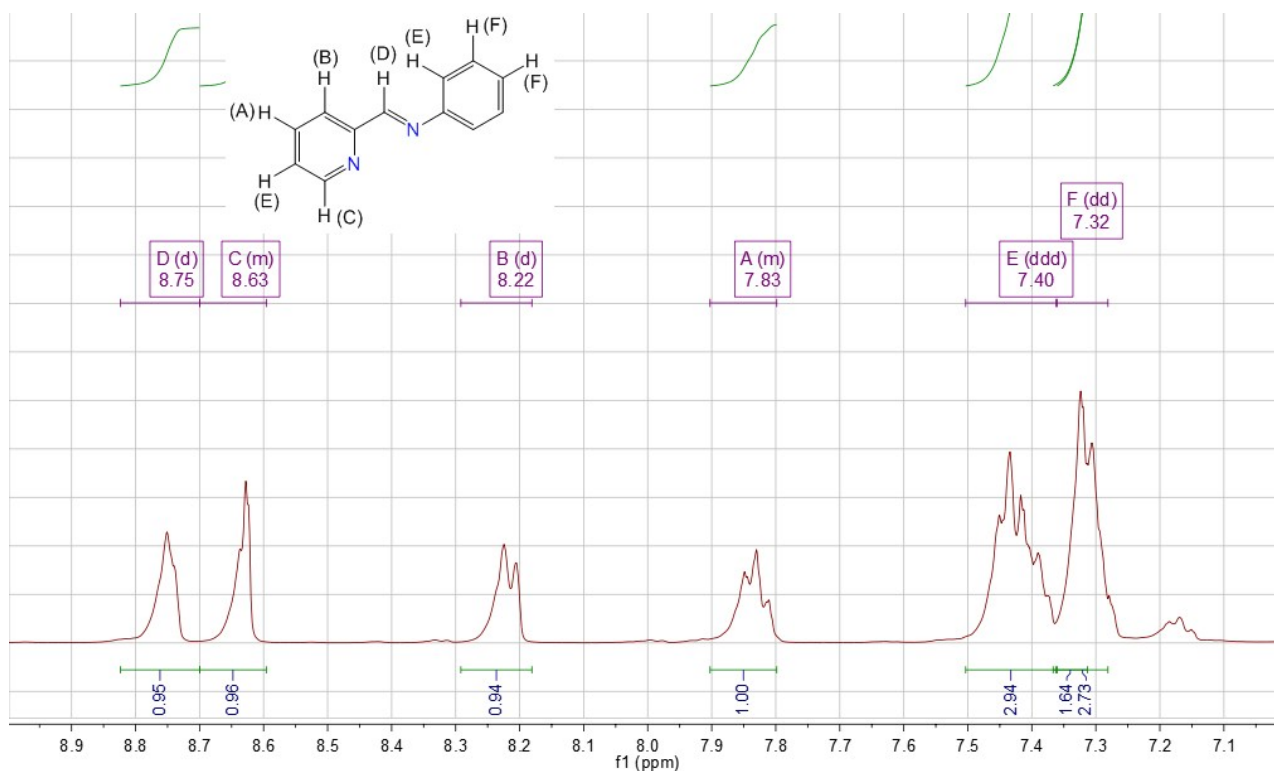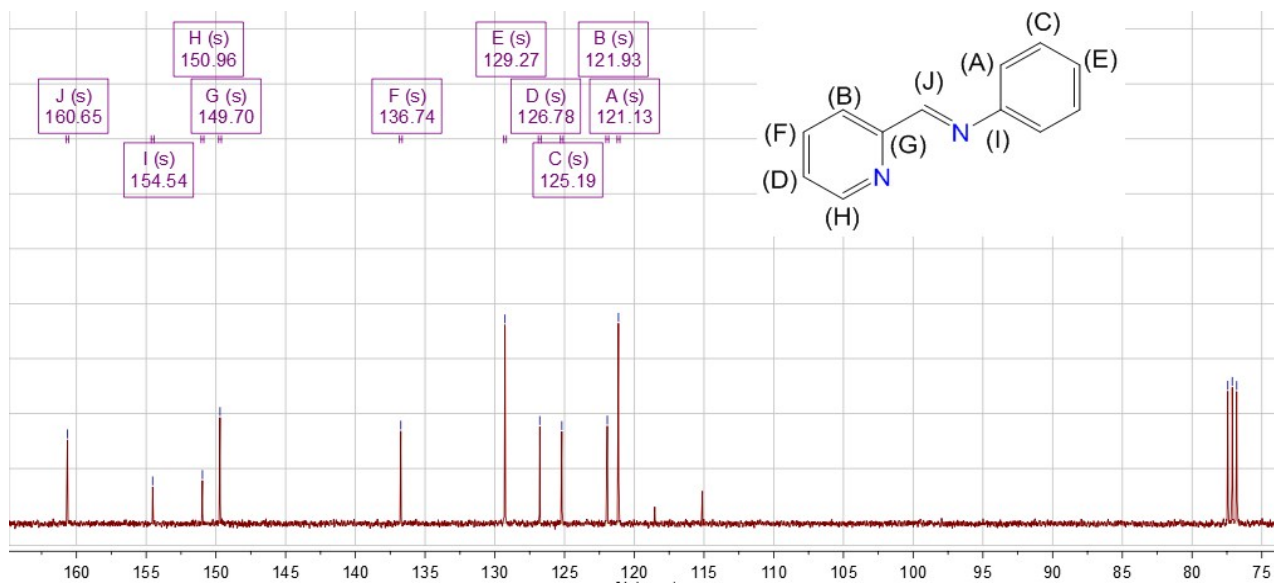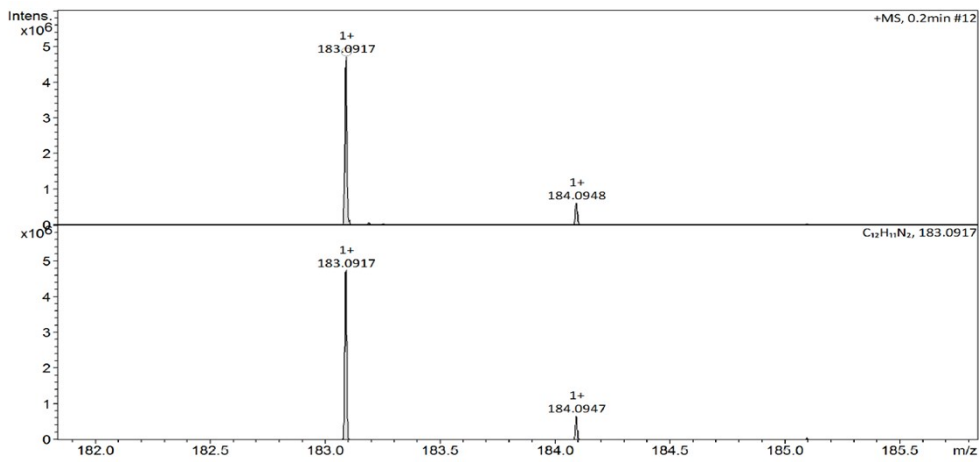

4-methyl-N-(pyridin-2-ylmethylene)aniline



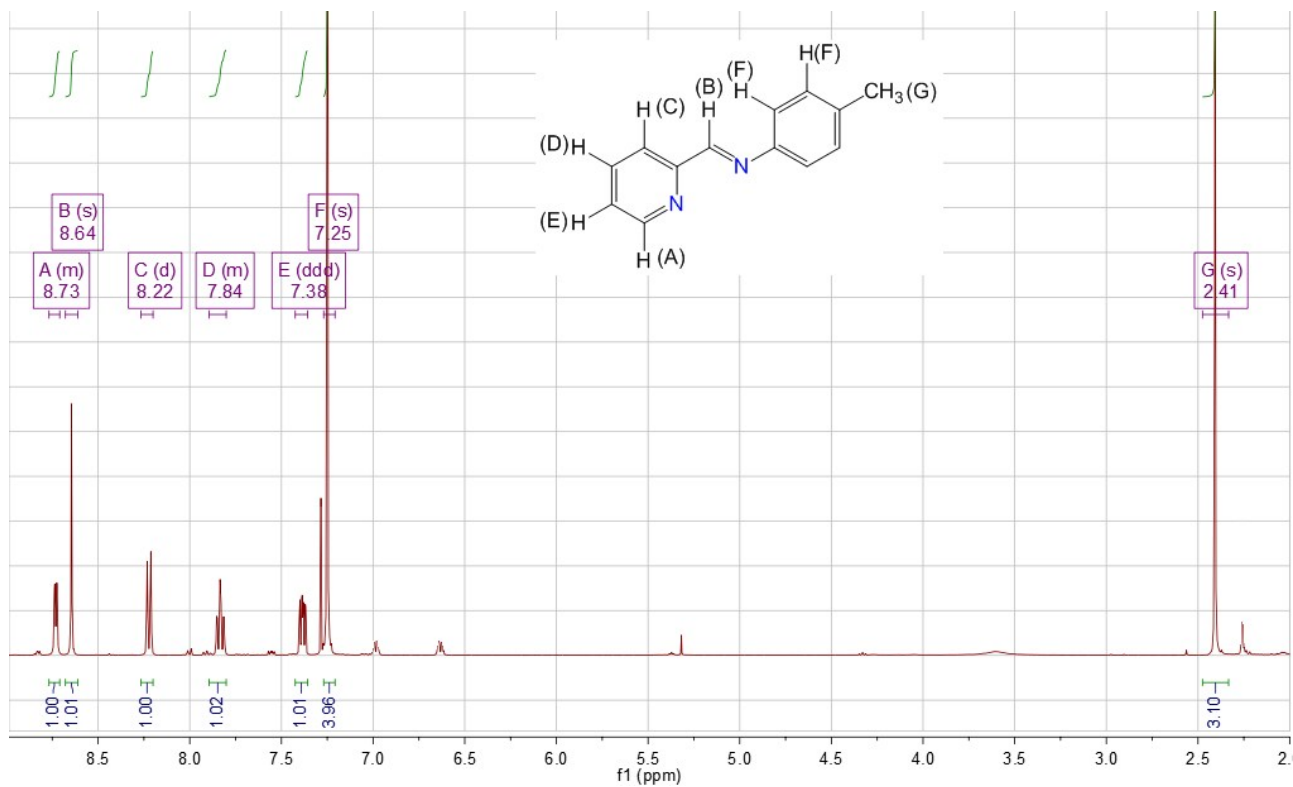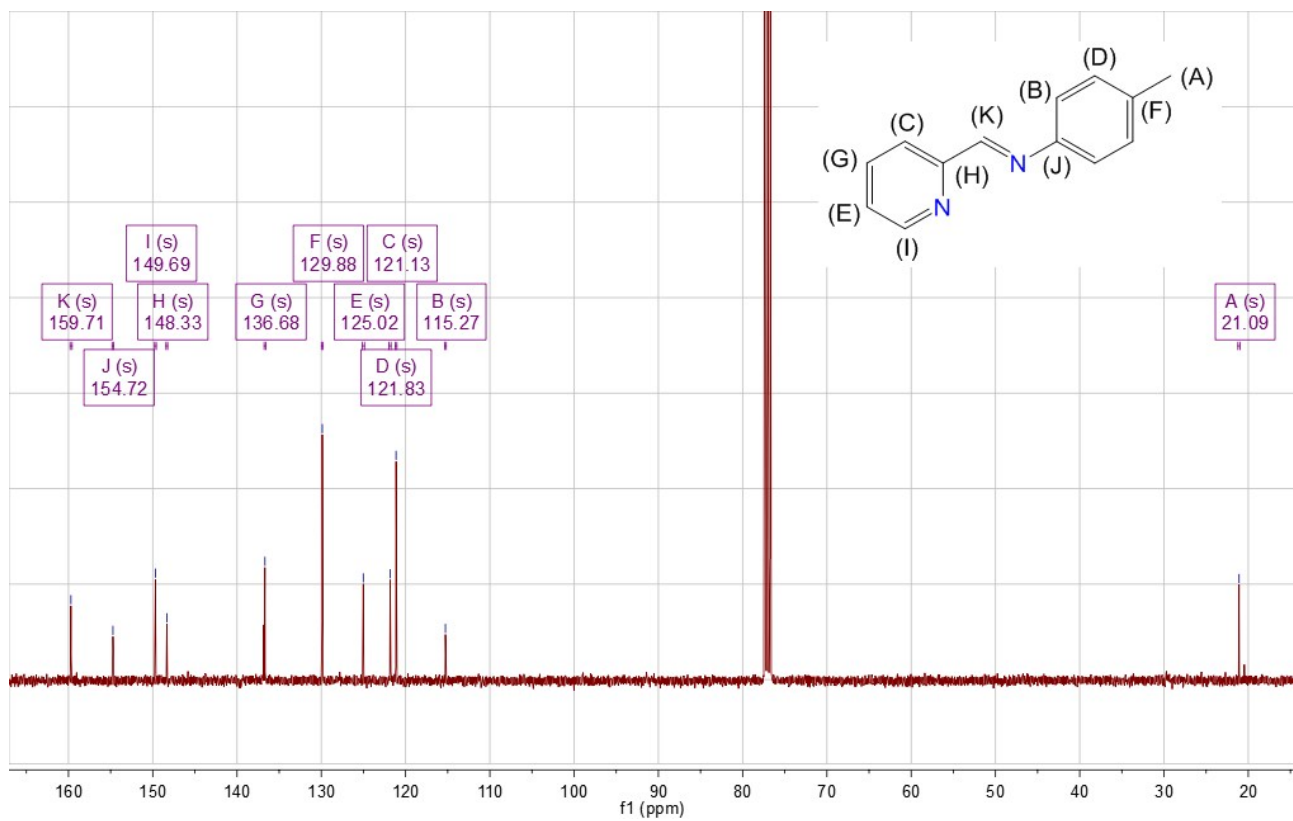

3-methyl-N-(pyridin-2-ylmethylene)aniline

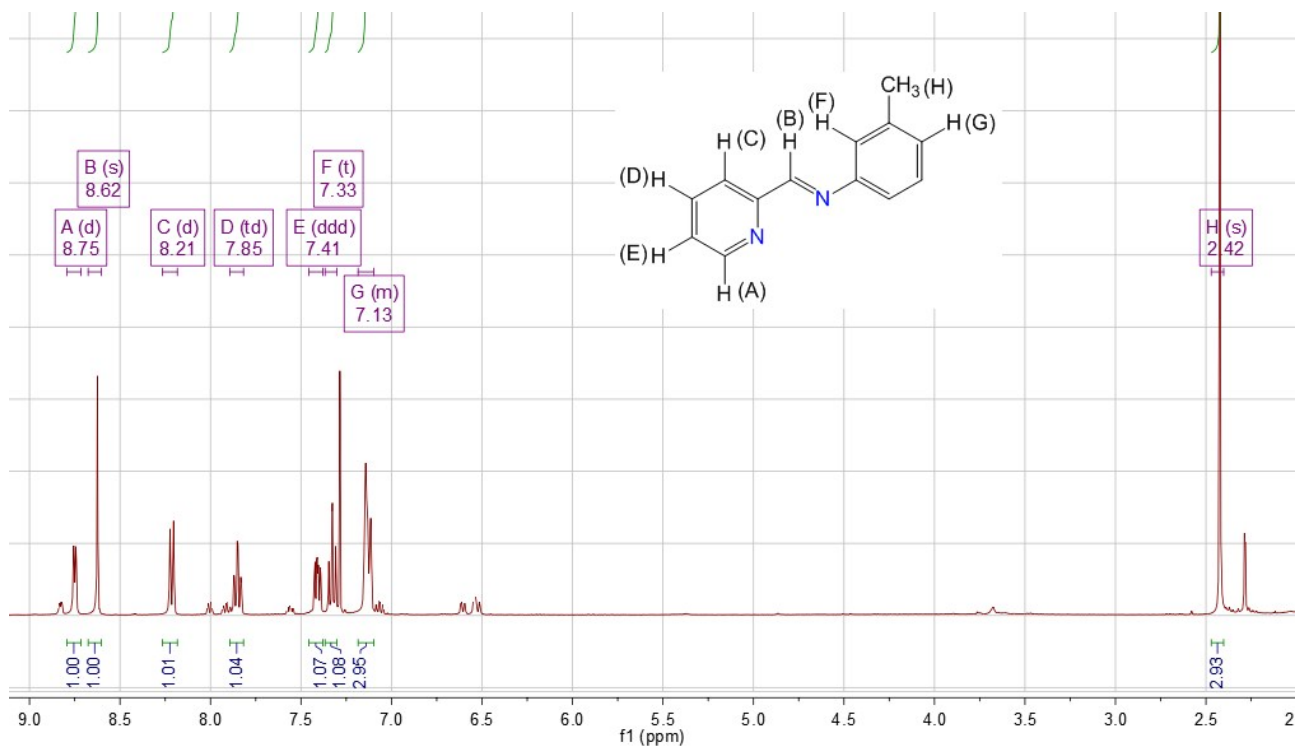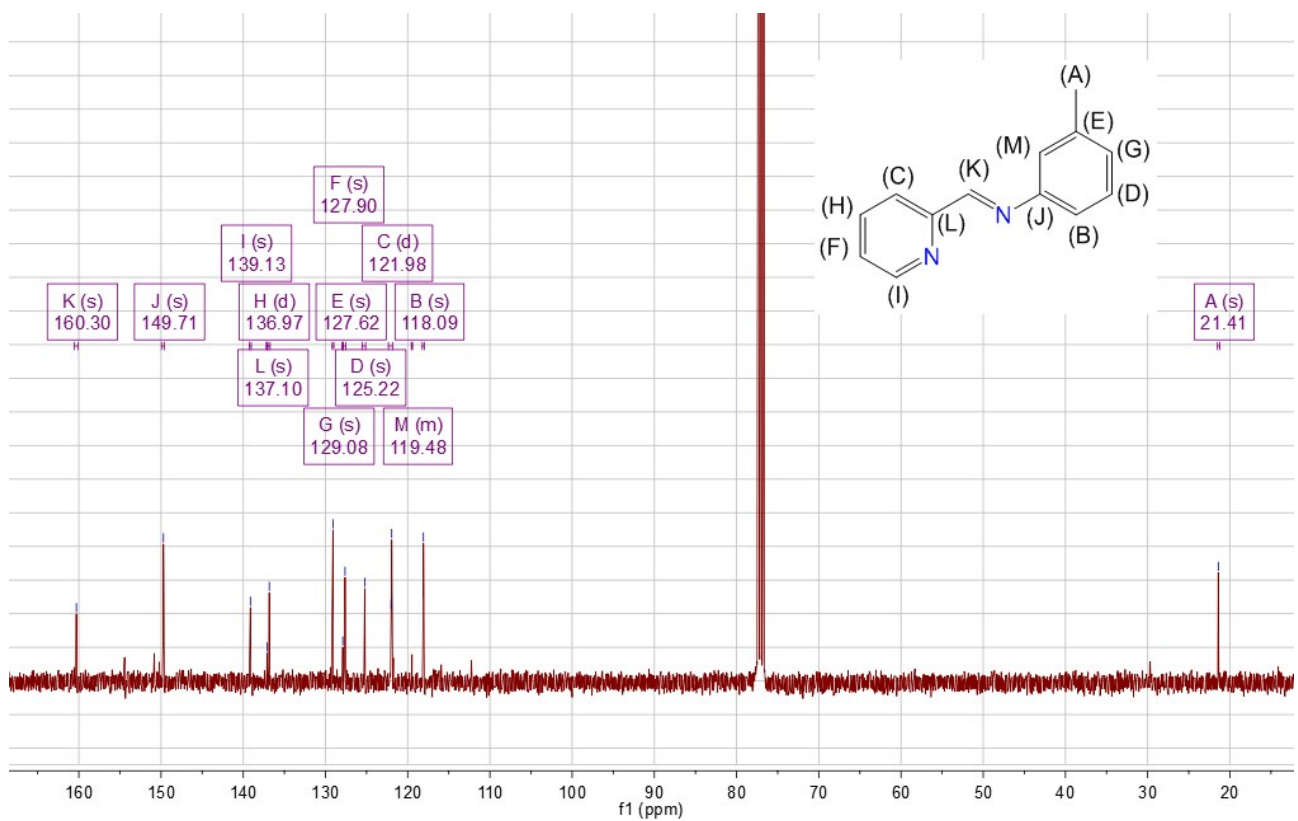

4-ethyl-N-(pyridin-2-ylmethylene)aniline

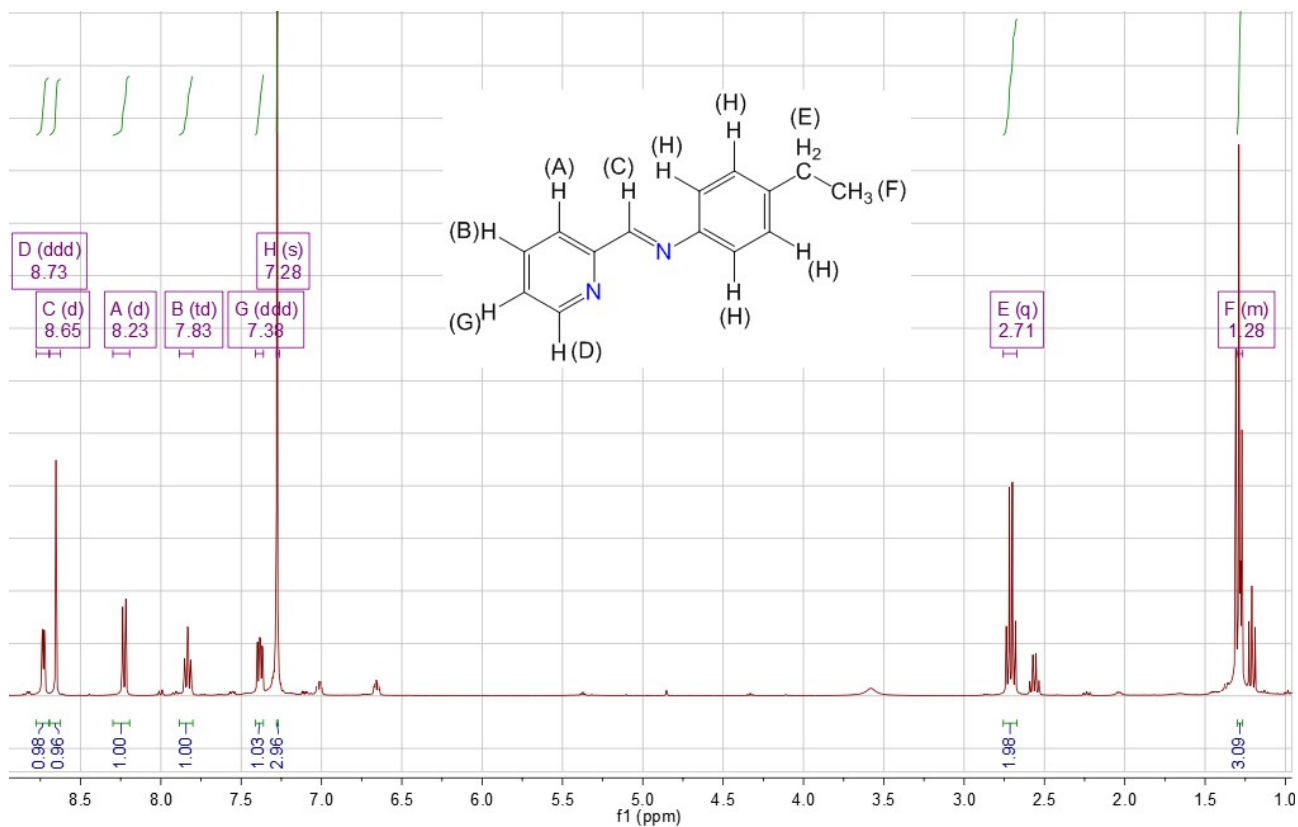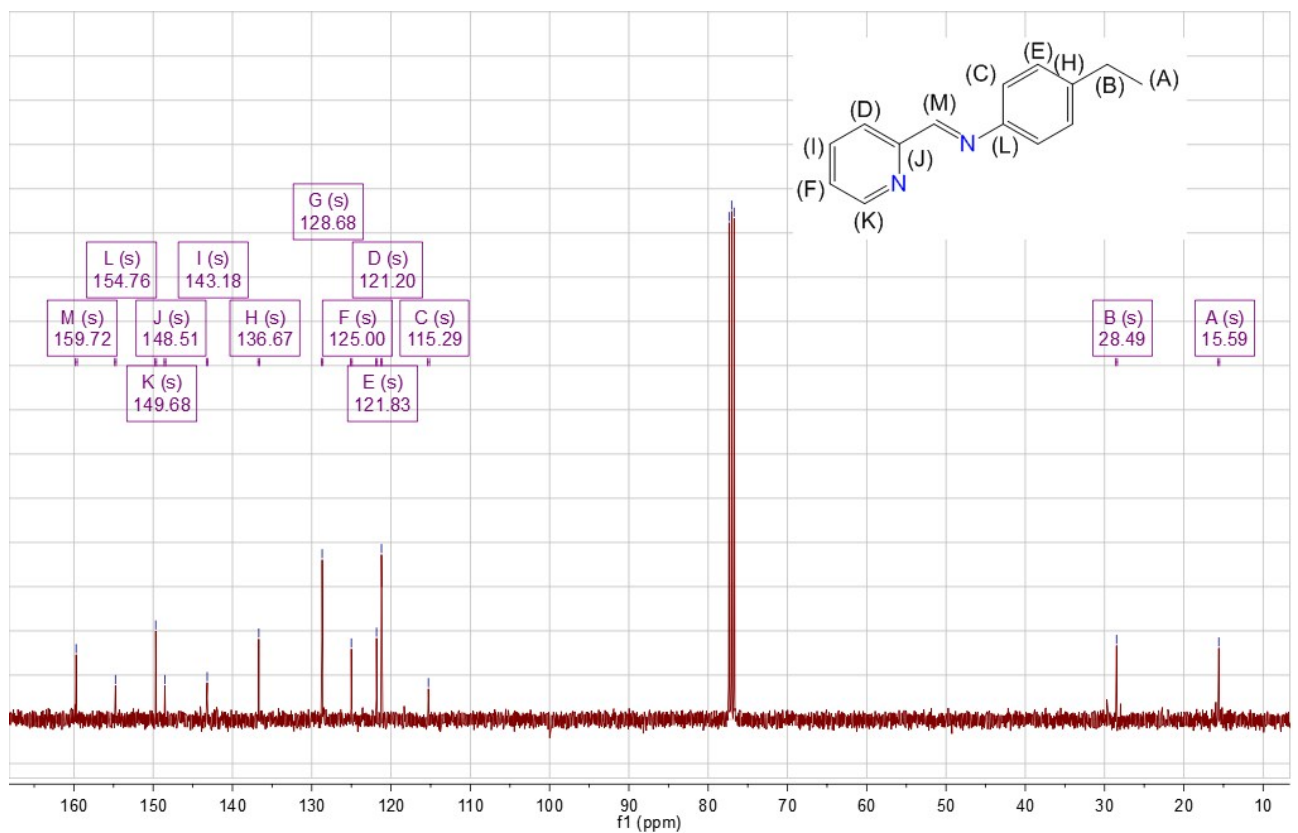

N-((4-chloropyridin-2-yl)methylene)aniline

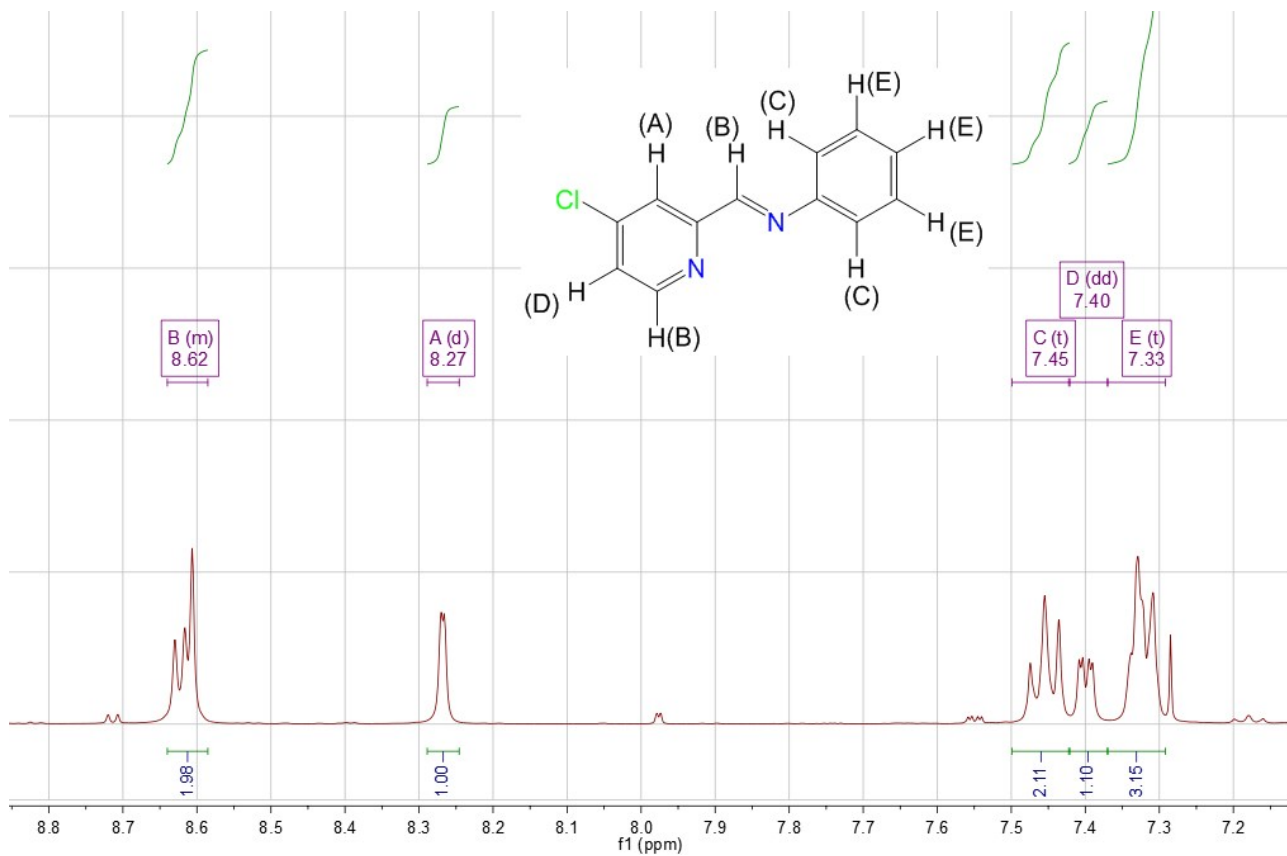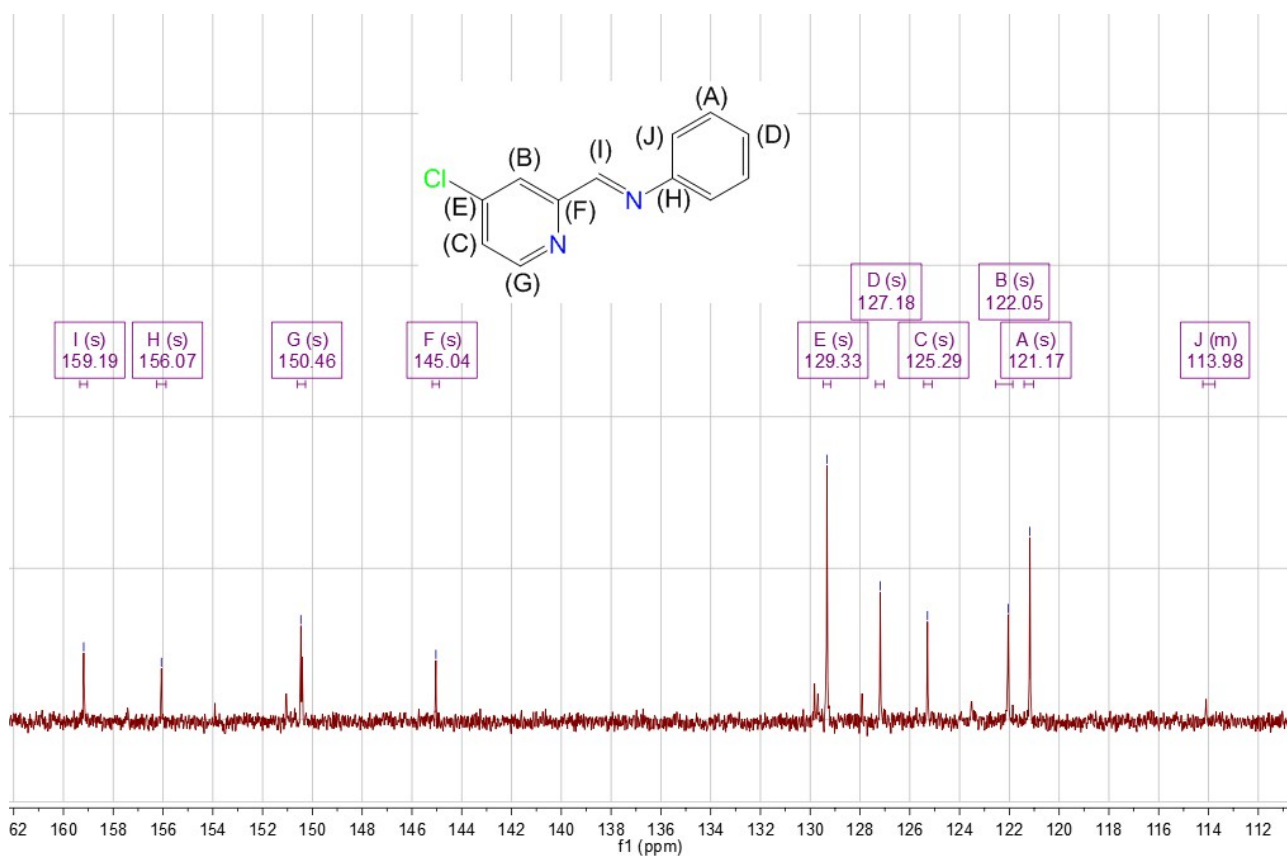

4-methoxy-N-(pyridin-2-ylmethylene)aniline

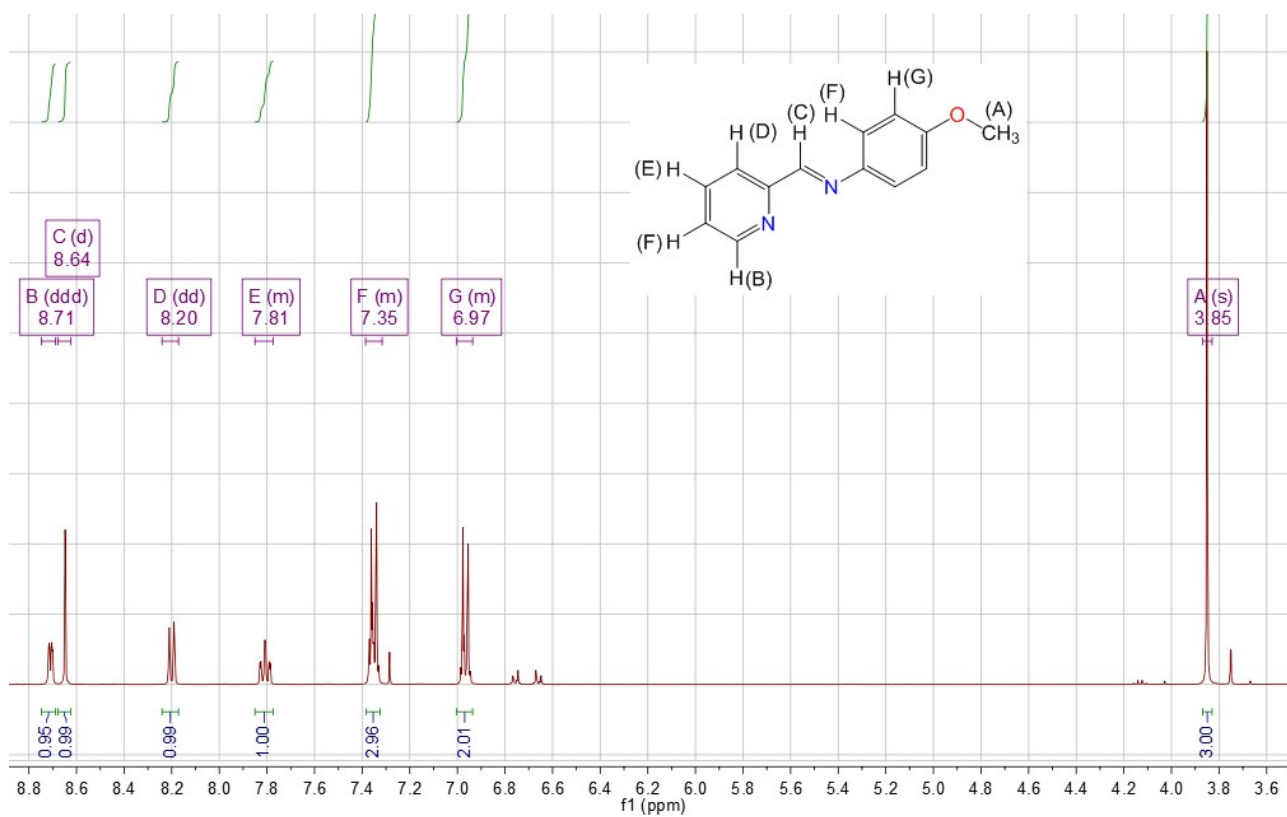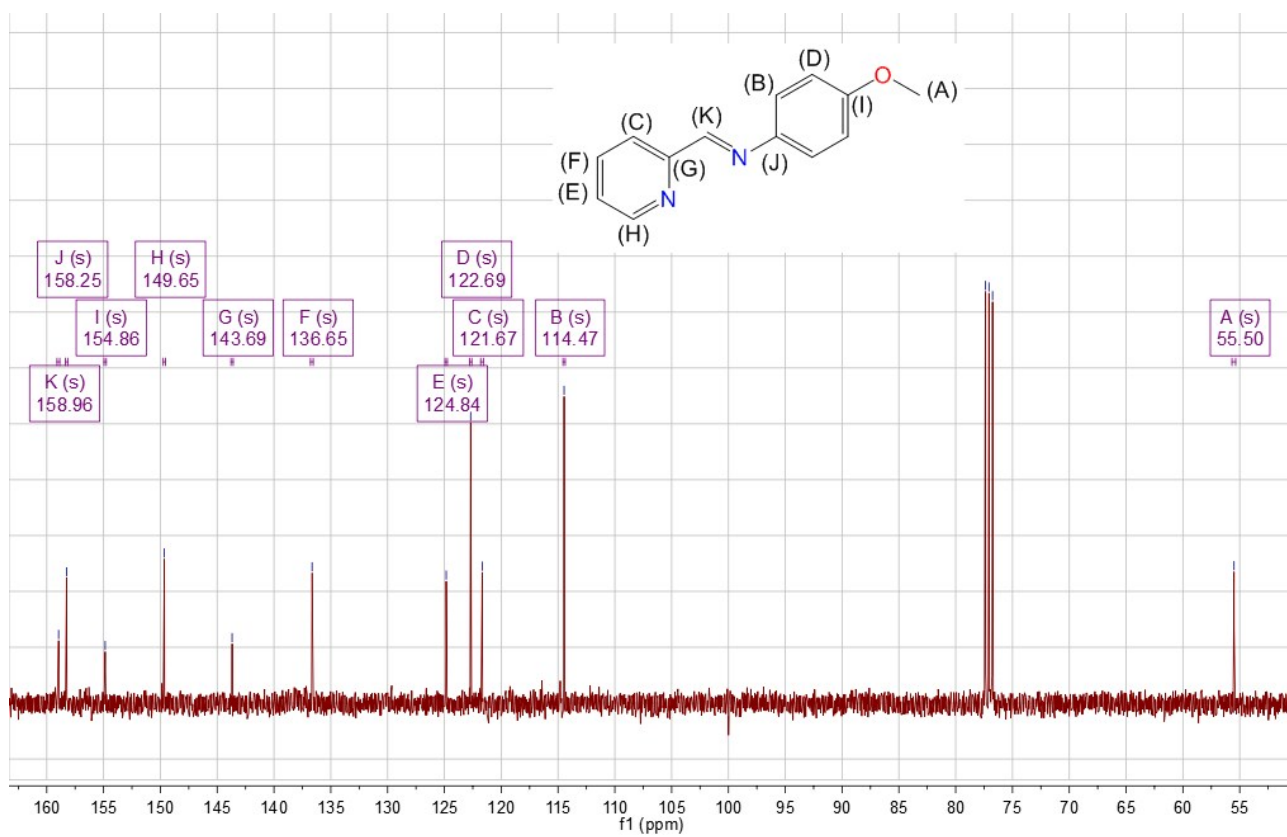

N-(pyridin-2-ylmethyl) aniline

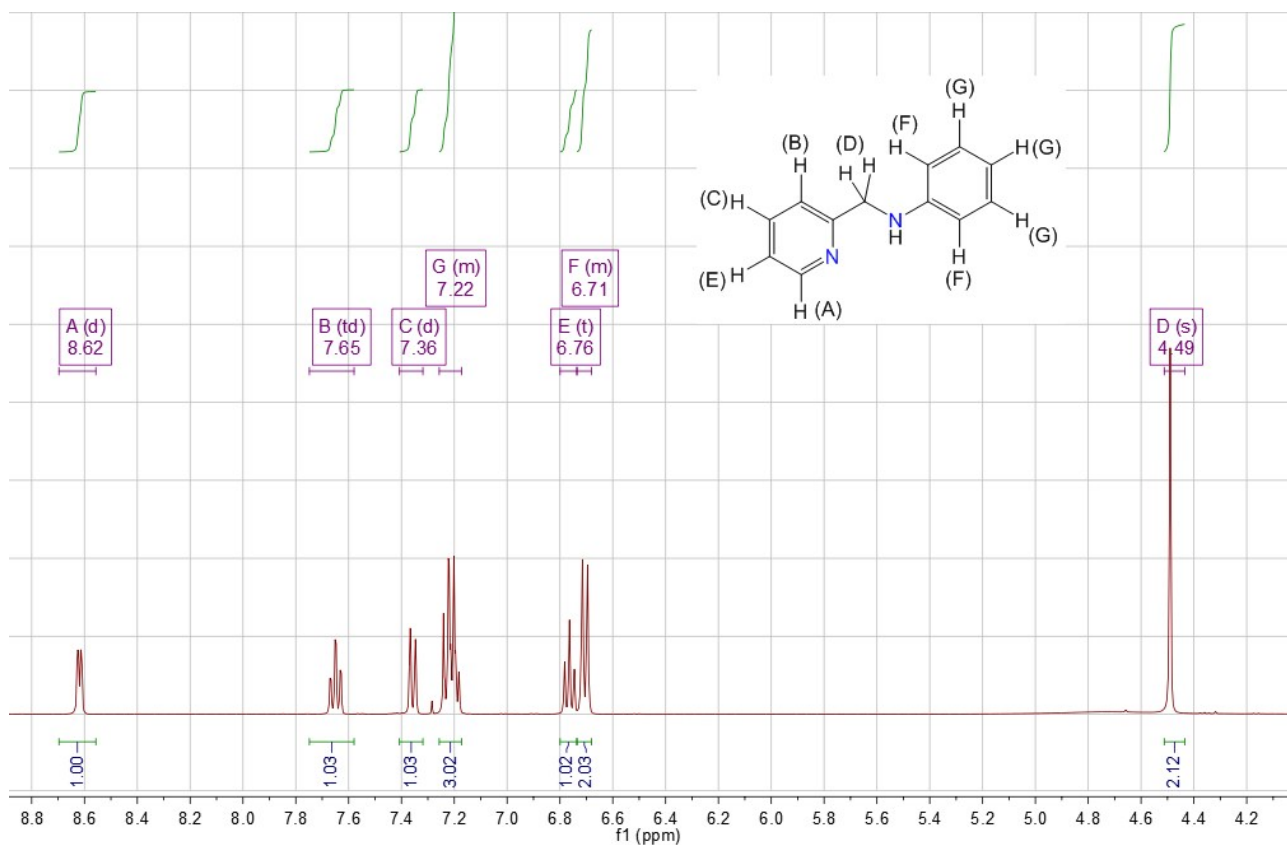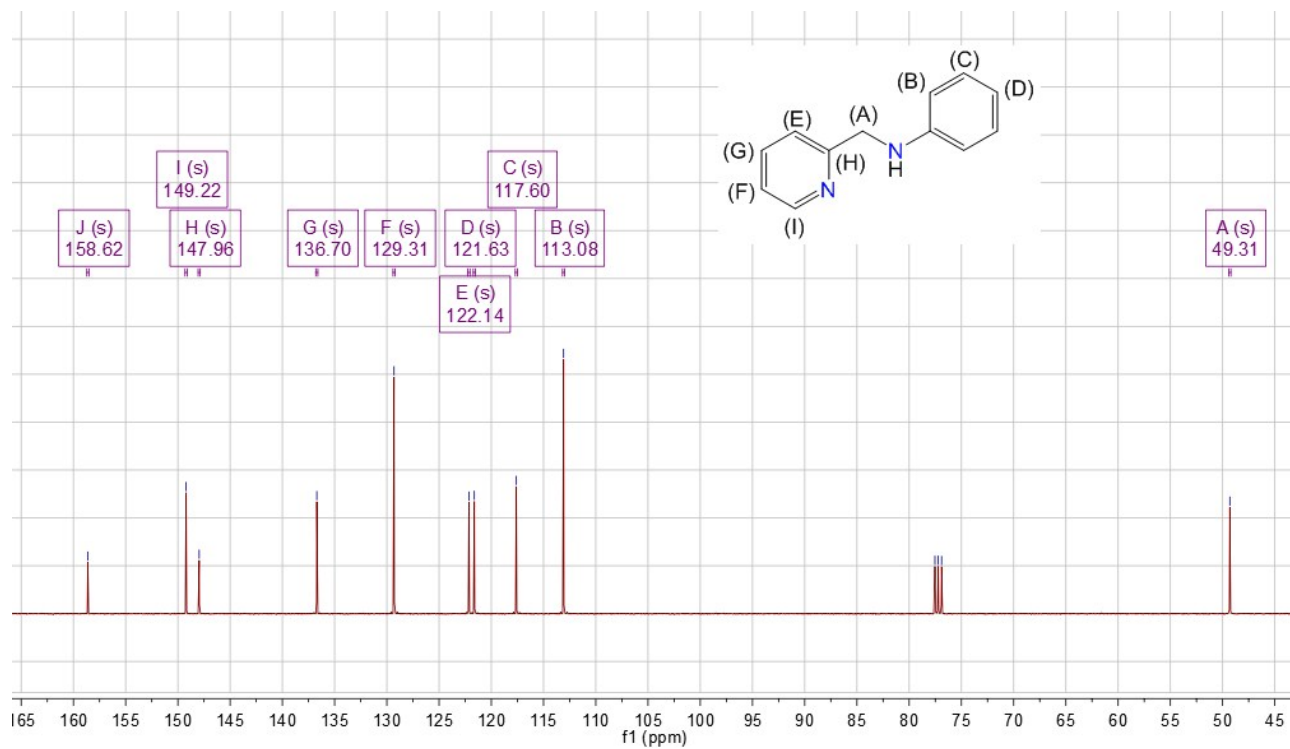

4-methyl-N-(pyridin-2-ylmethyl)aniline

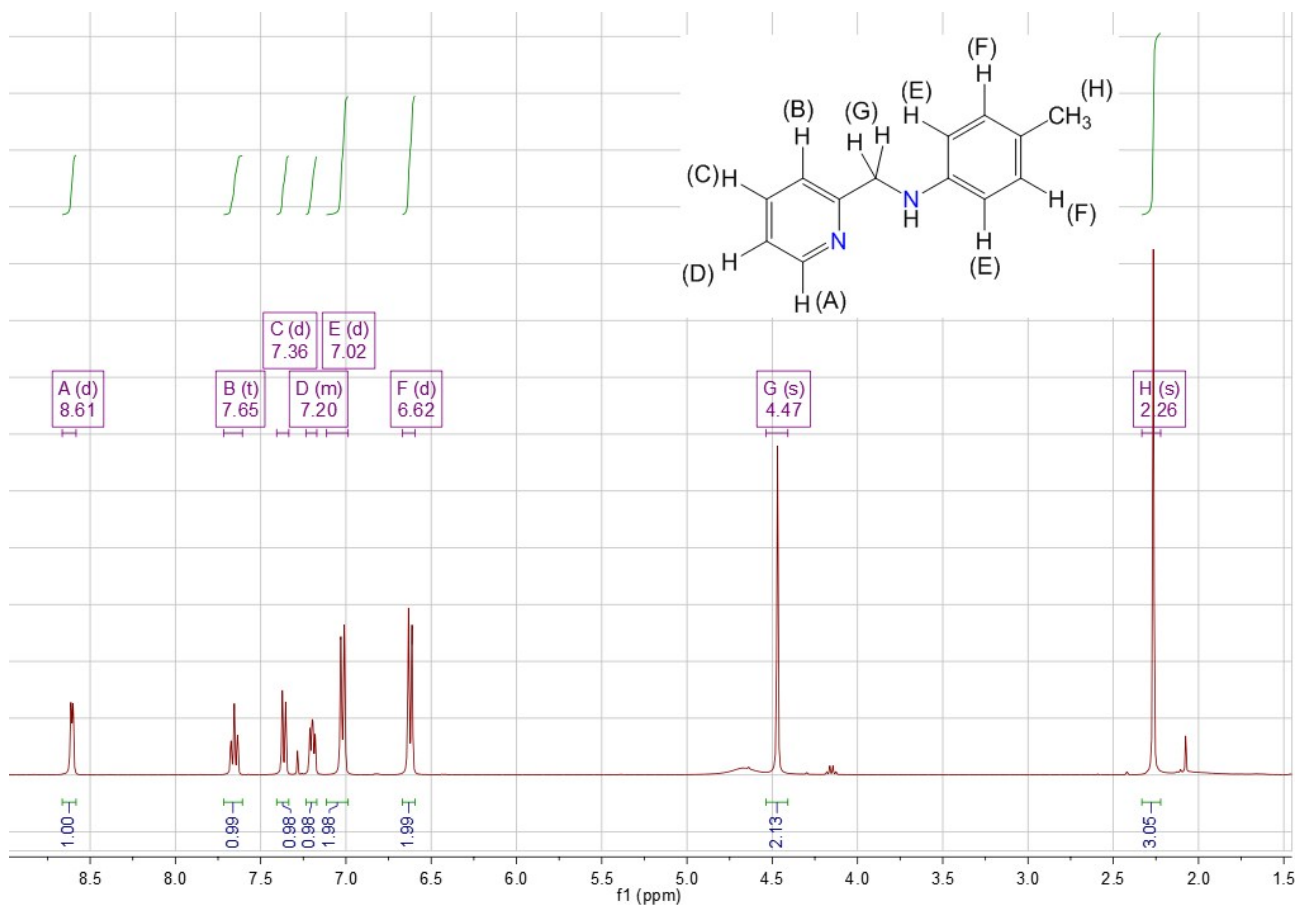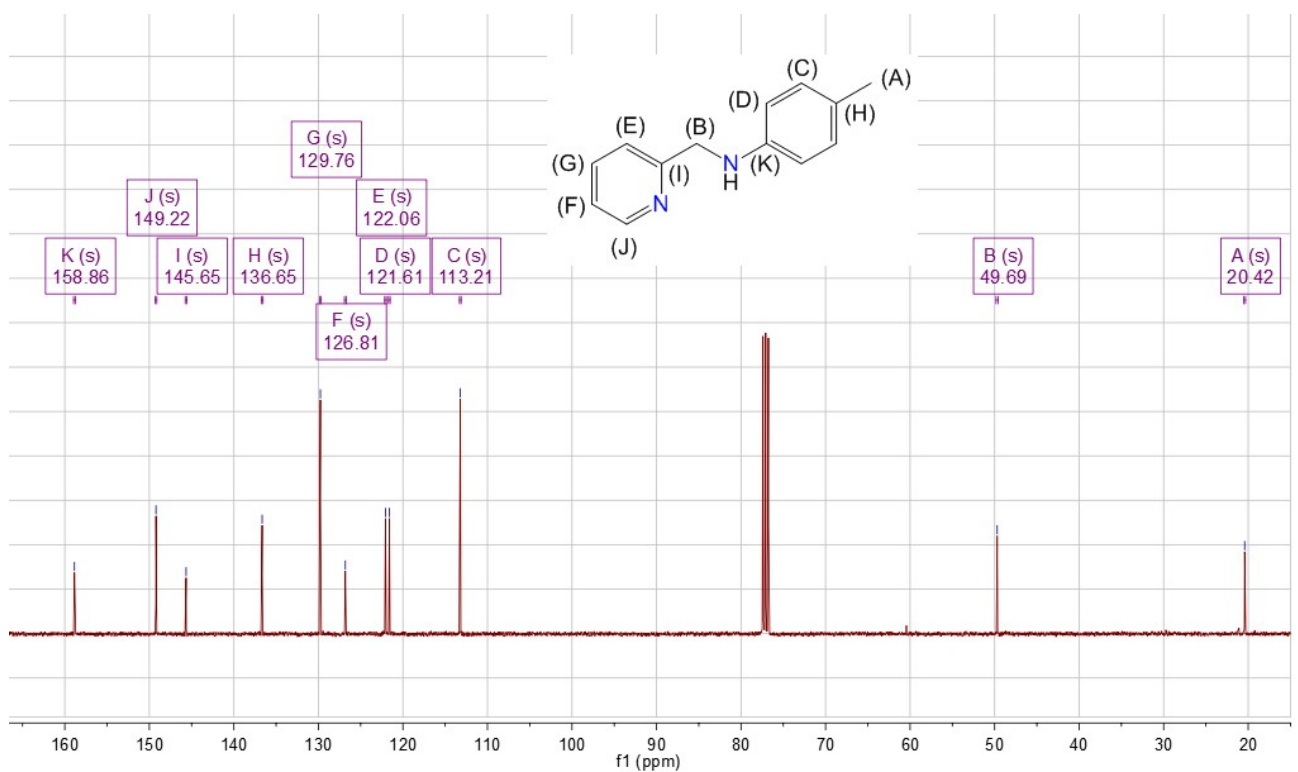

3-methyl-N-(pyridin-2-ylmethyl)aniline

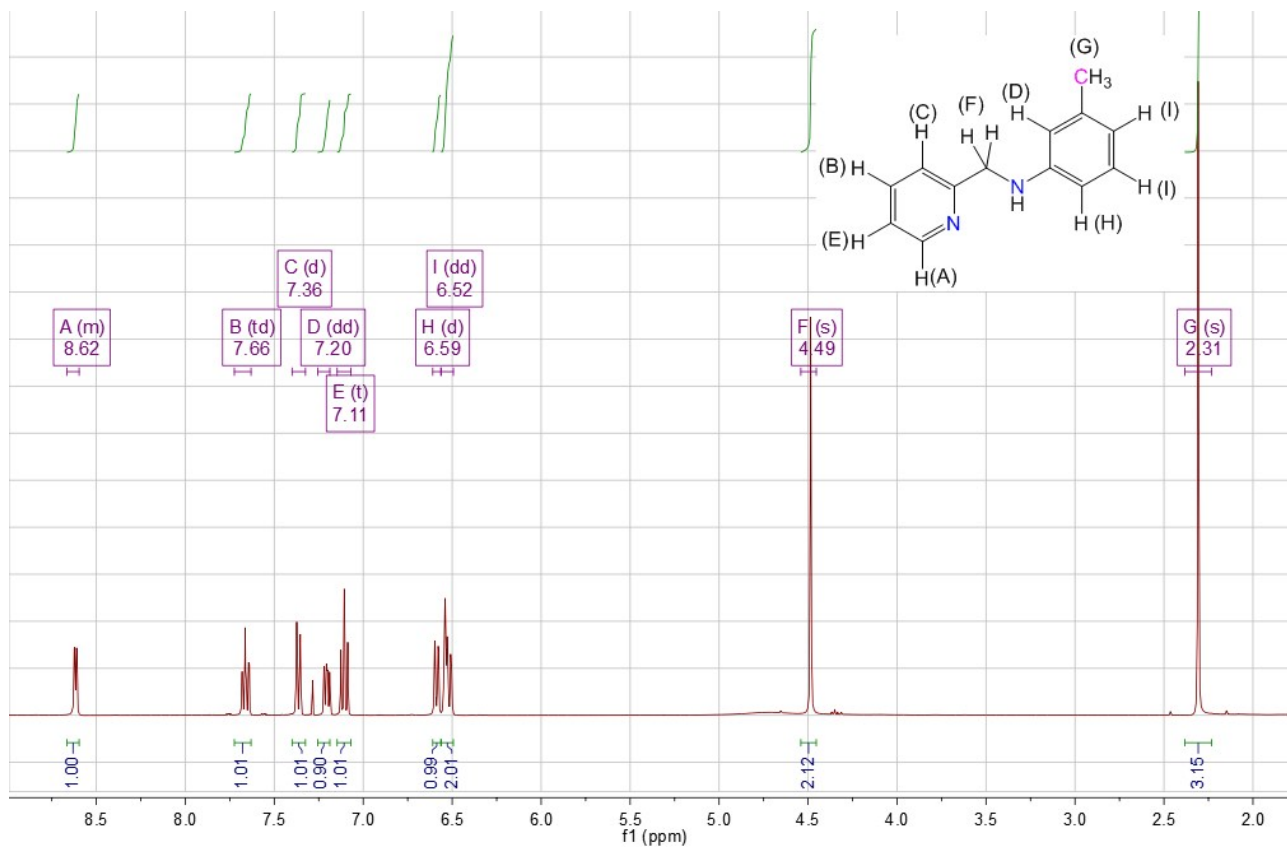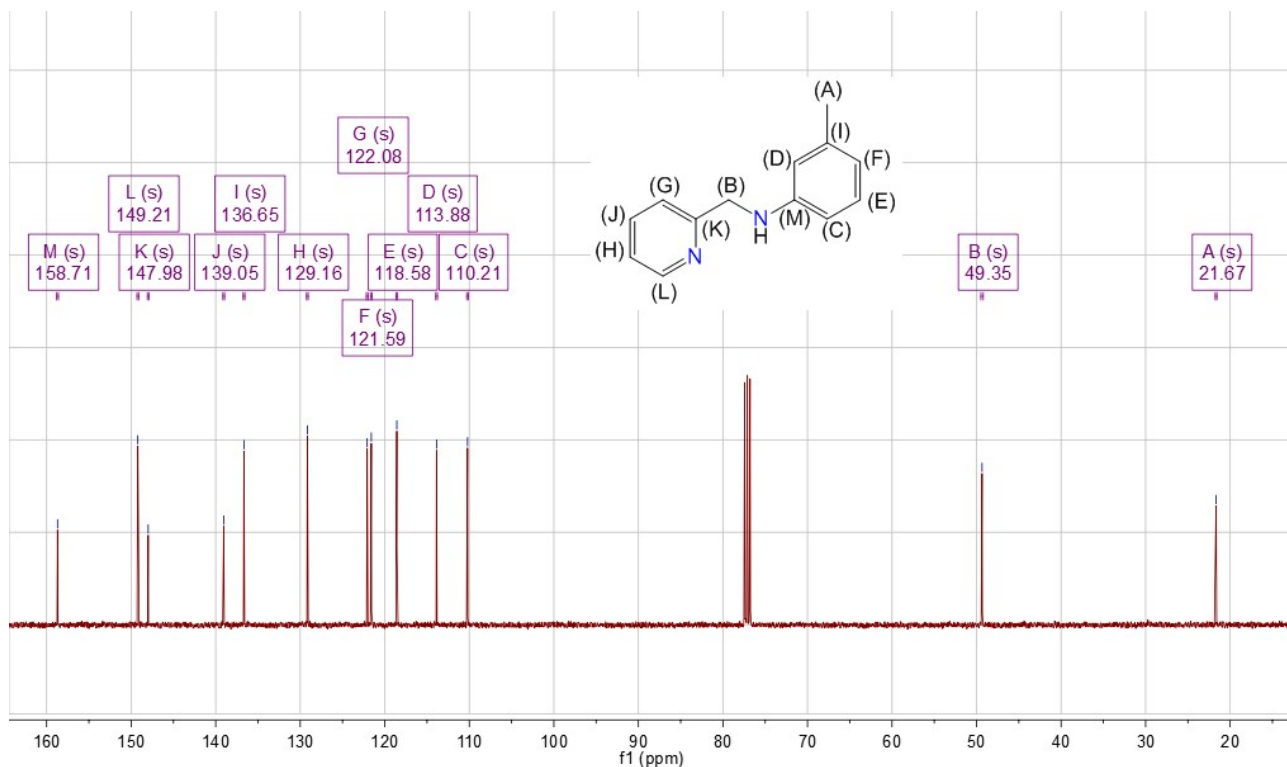

2-methyl-N-(pyridin-2-ylmethyl)aniline



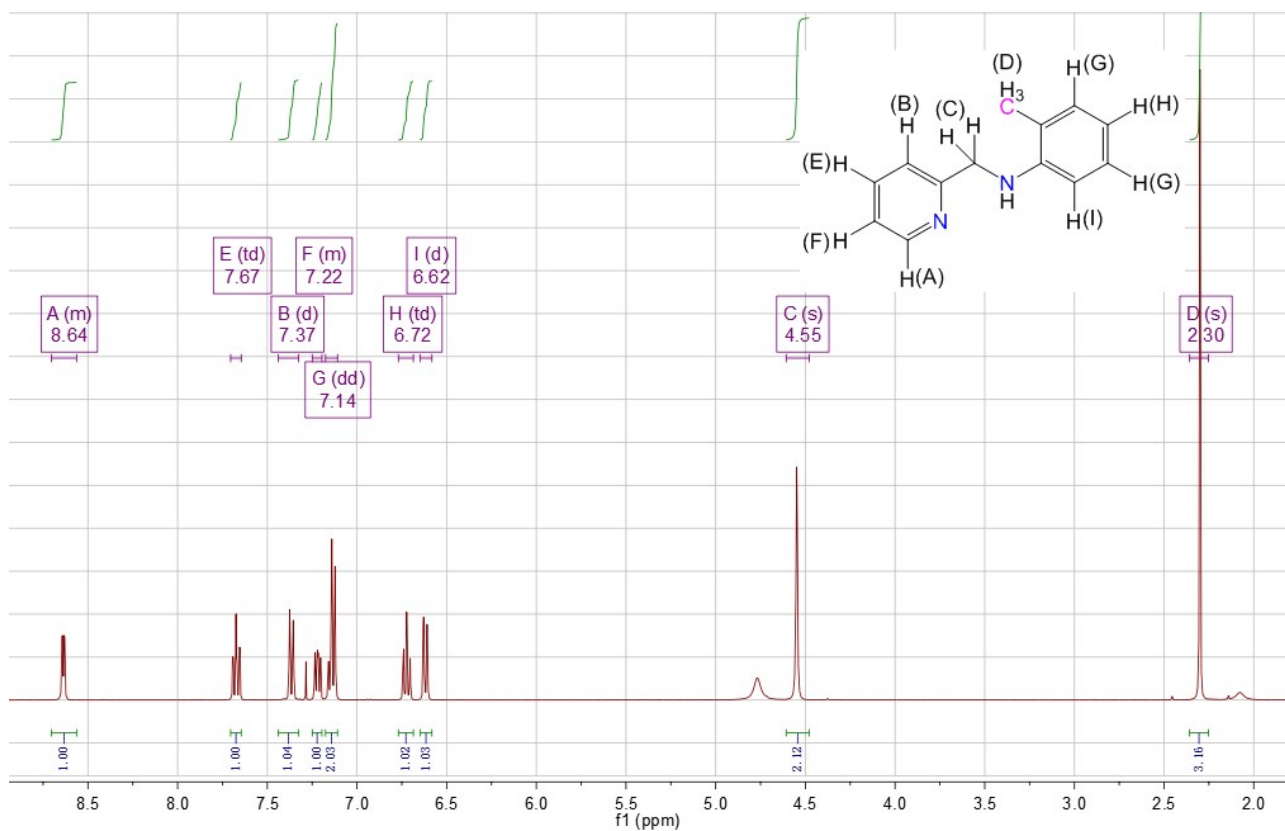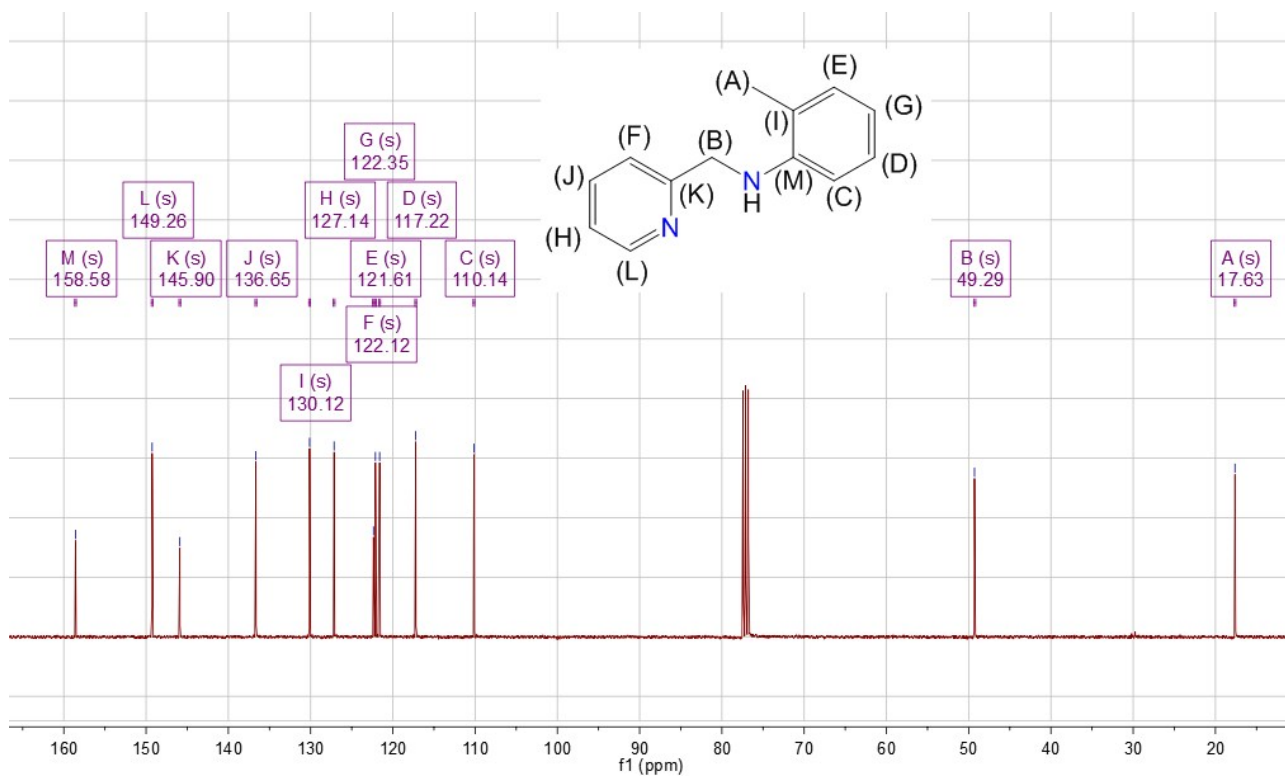

2,6-dimethyl-N-(pyridin-2-ylmethyl)aniline

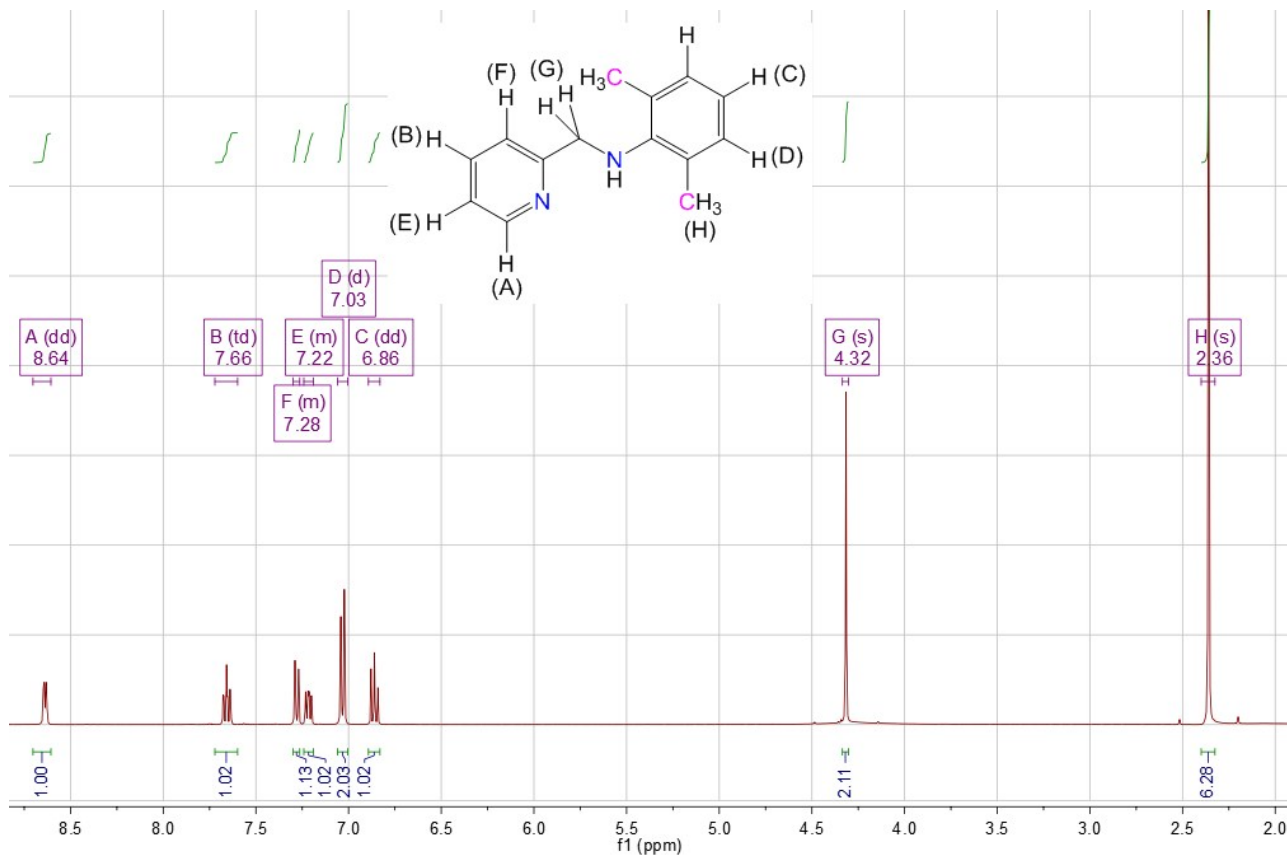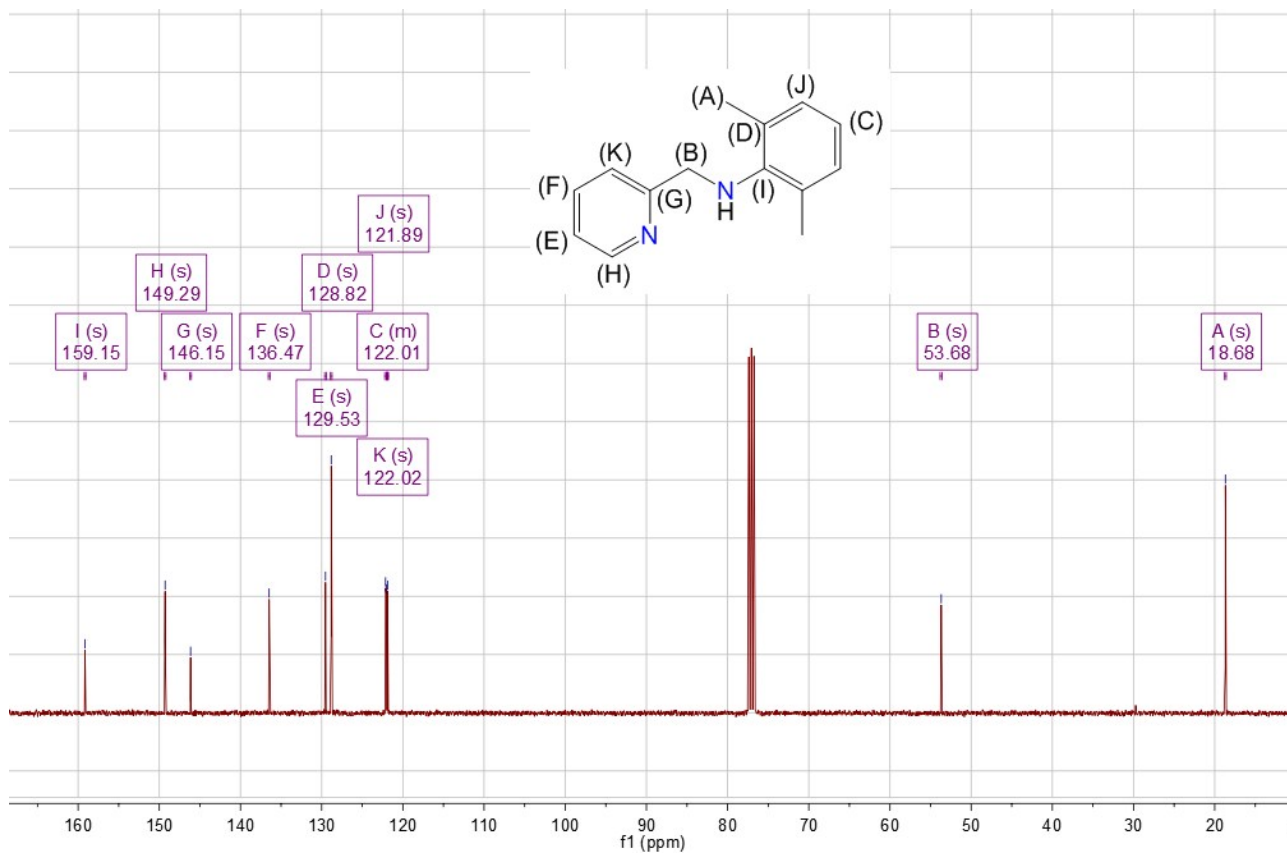

4-ethyl-N-(pyridin-2-ylmethyl)aniline

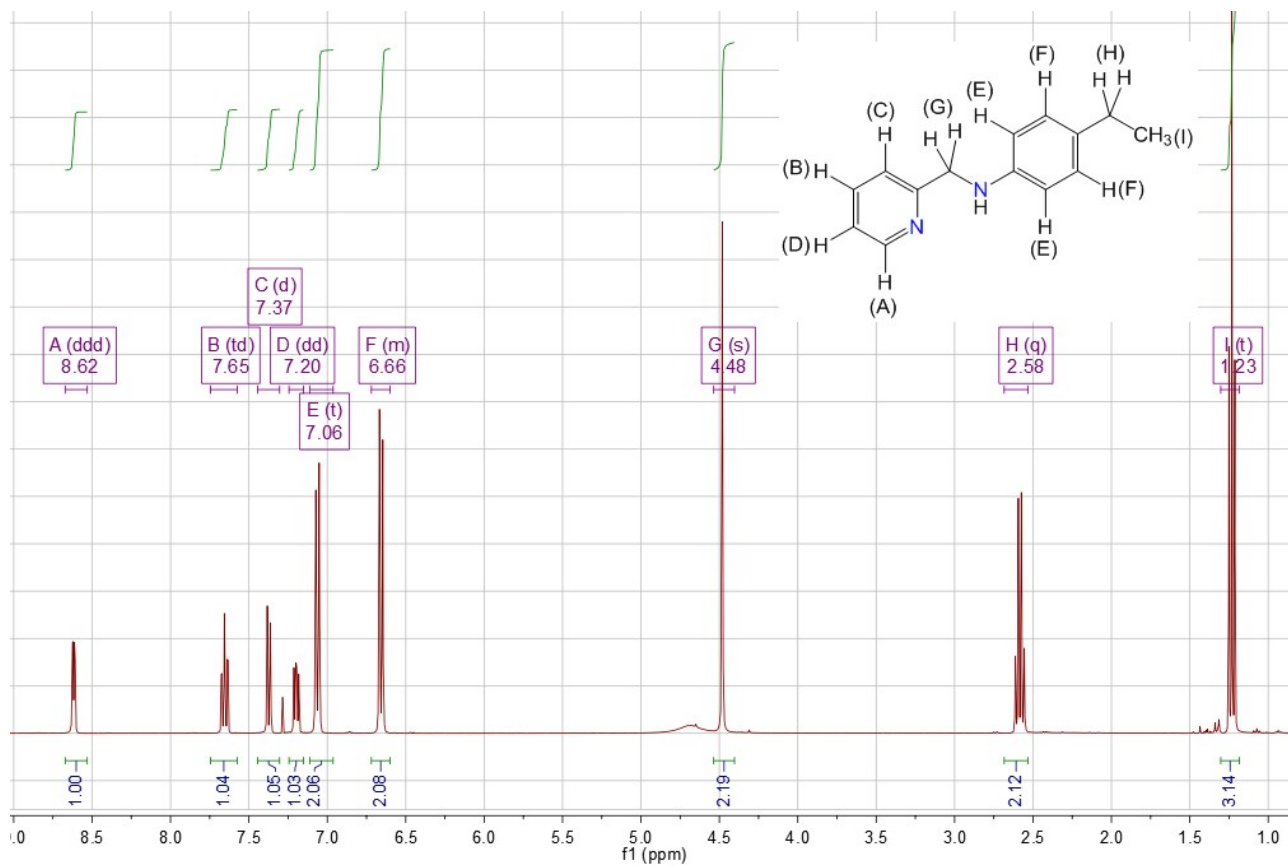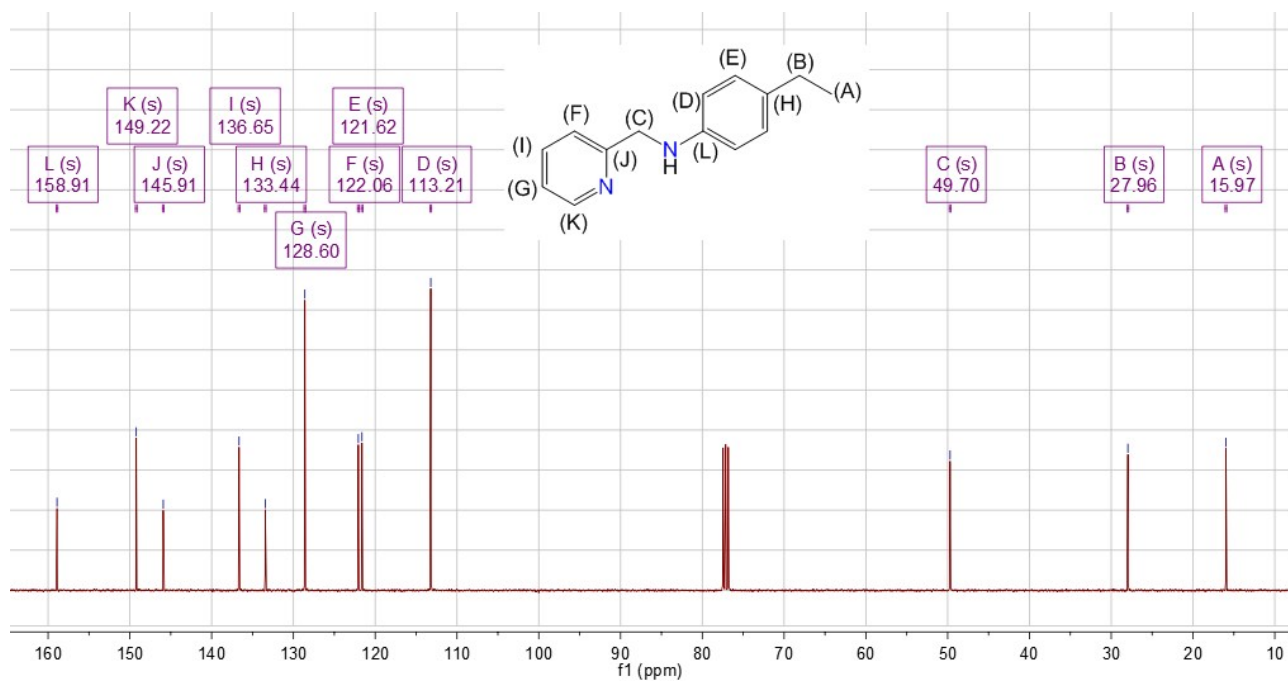

4-iodo-N-(pyridin-2-ylmethyl)aniline

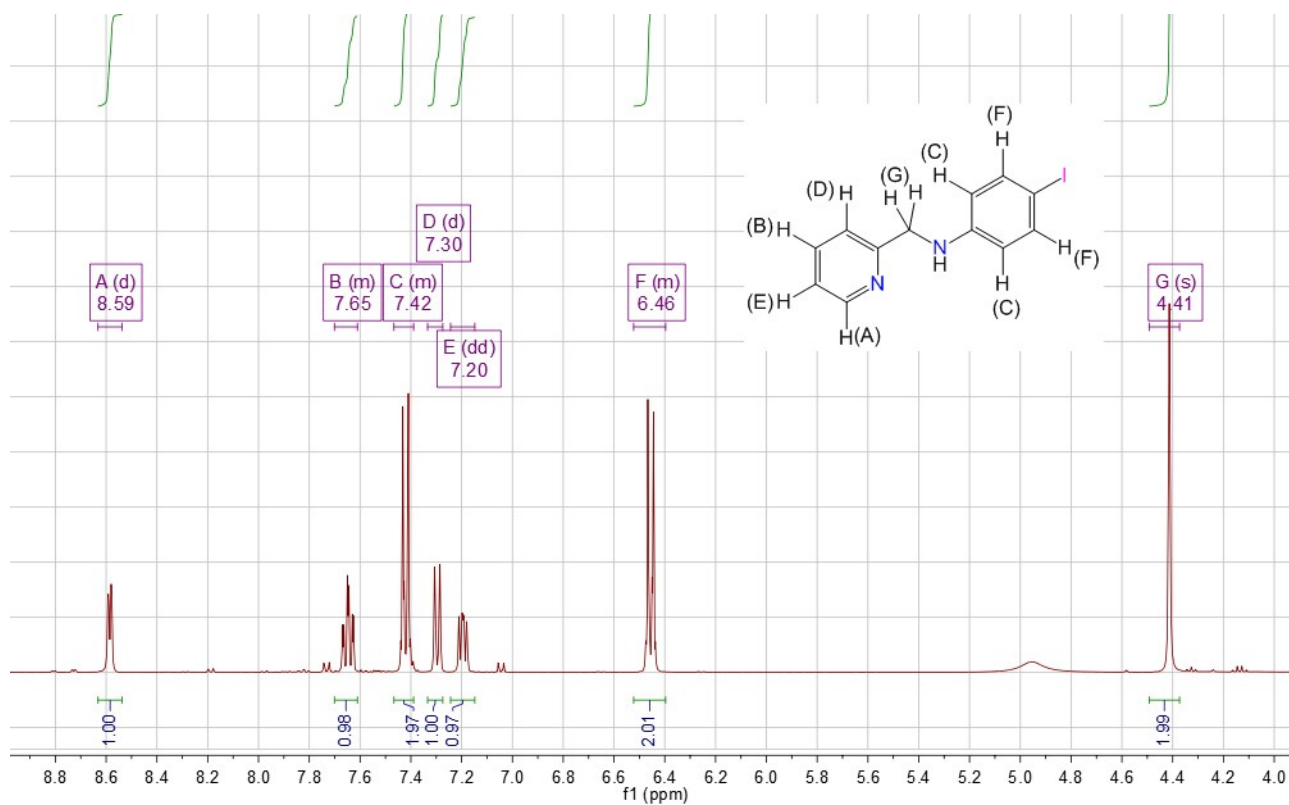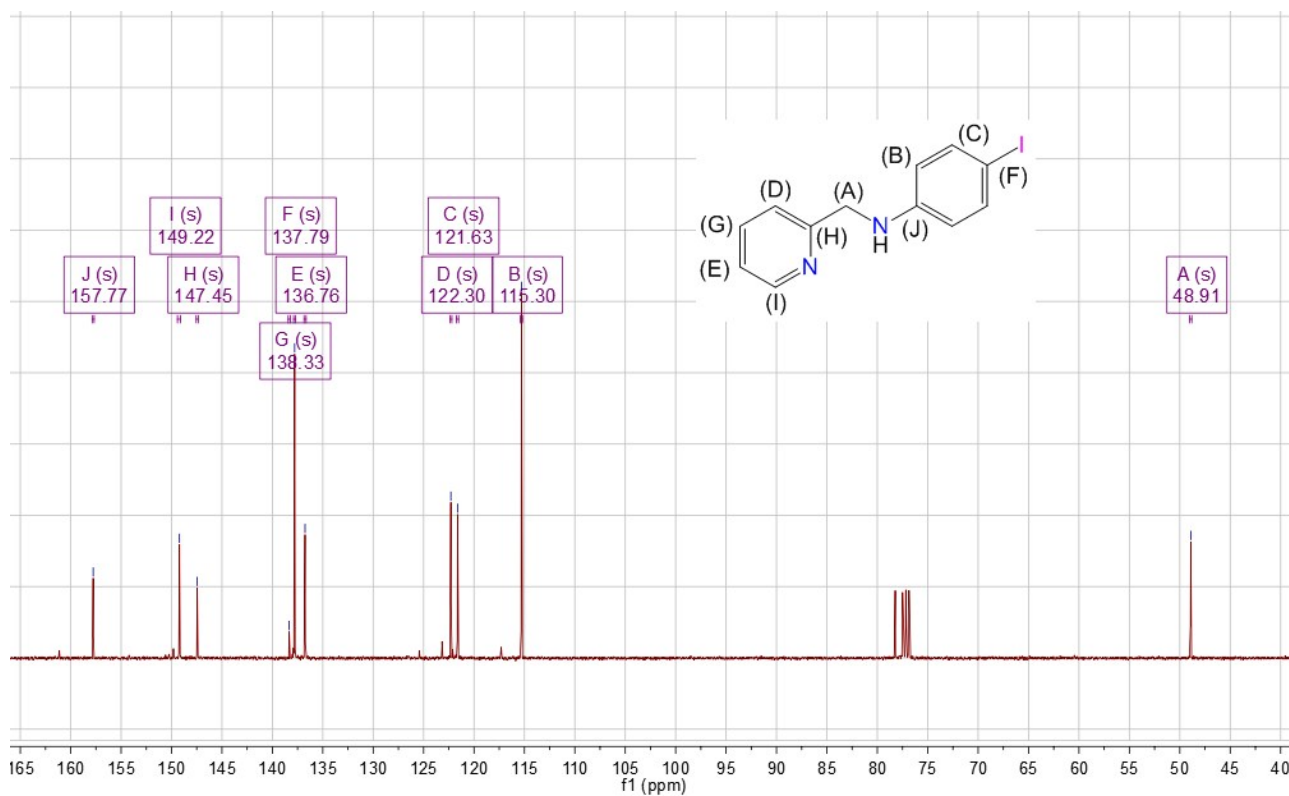

4-methoxy-N-(pyridin-2-ylmethyl)aniline

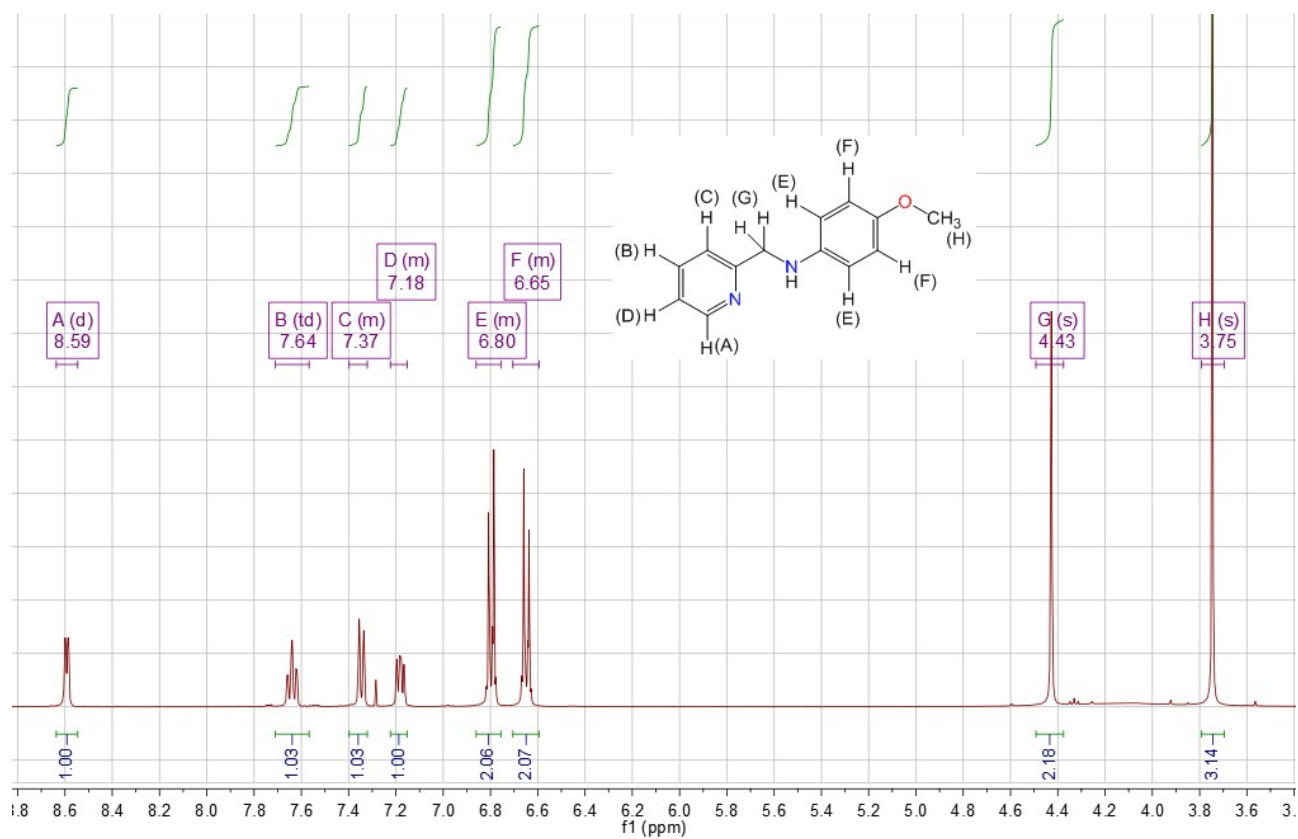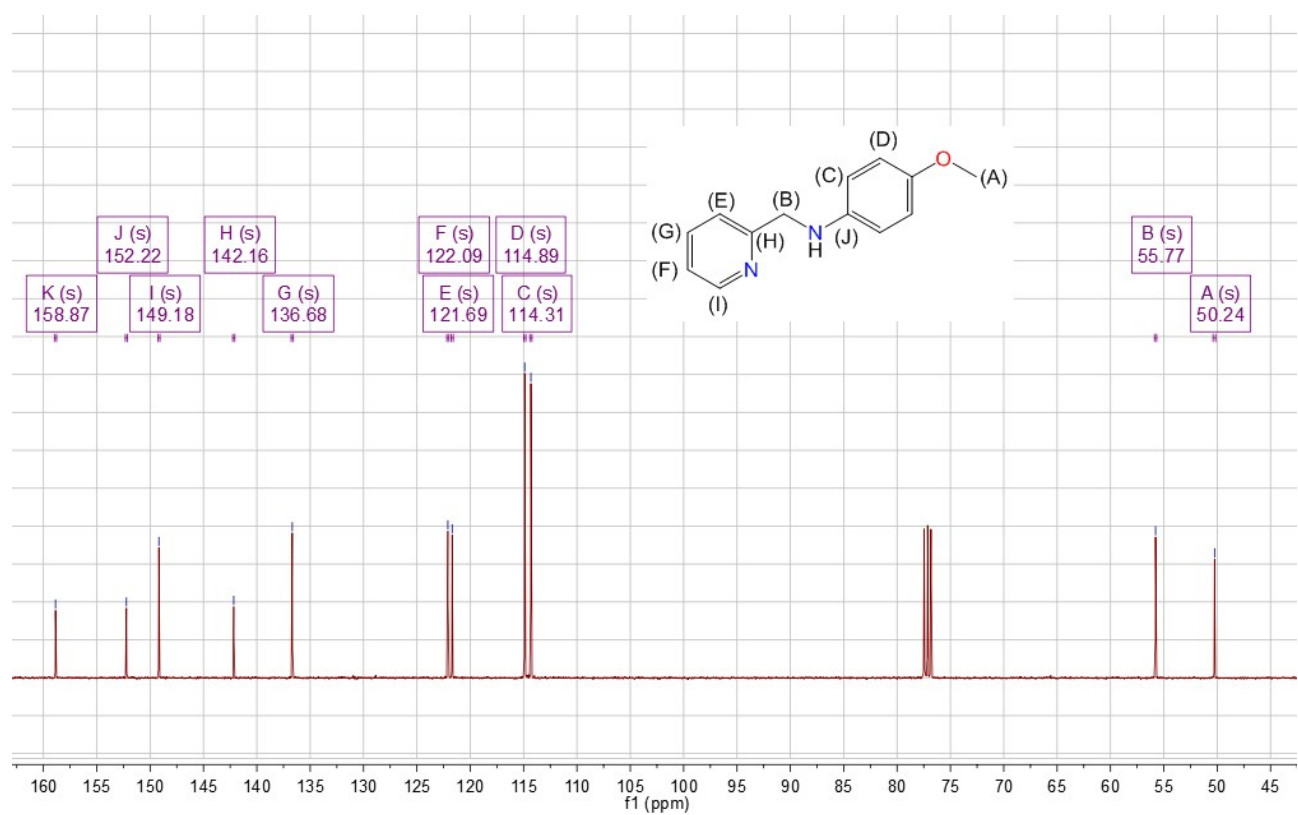

*N*-((4-chloropyridin-2-yl)methyl)aniline

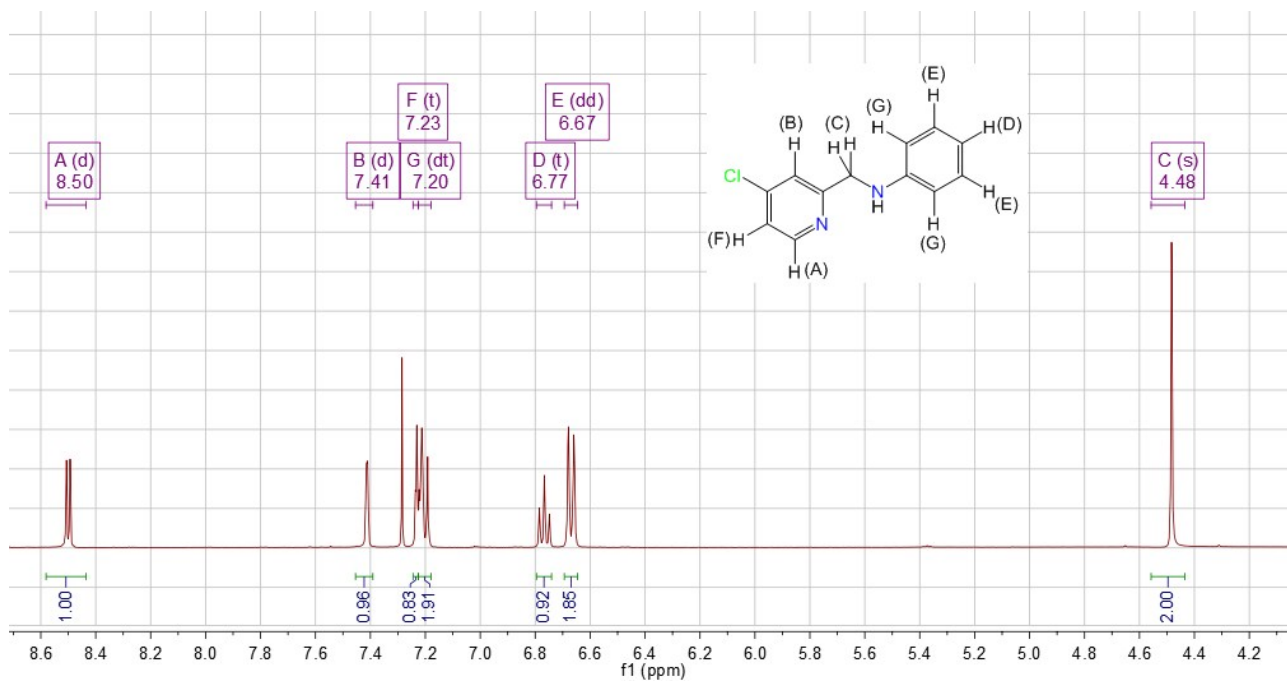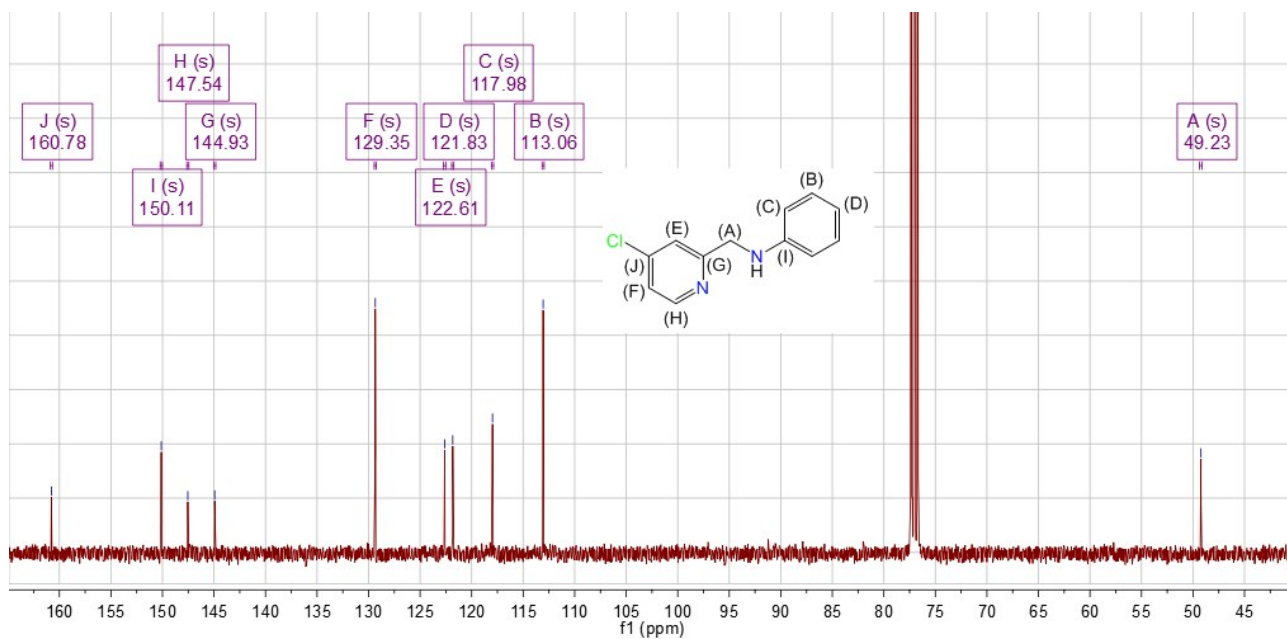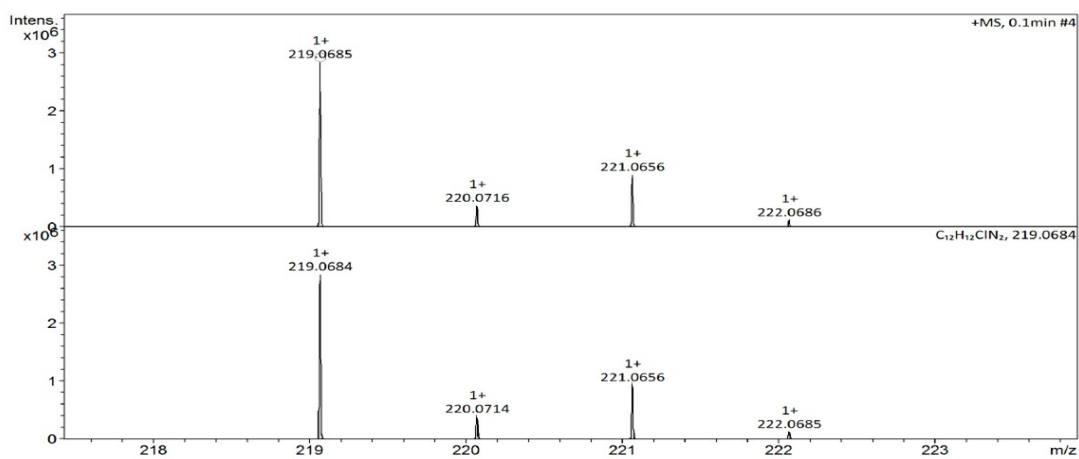

N-(pyridin-2-ylmethyl)-4-(trifluoromethyl)aniline

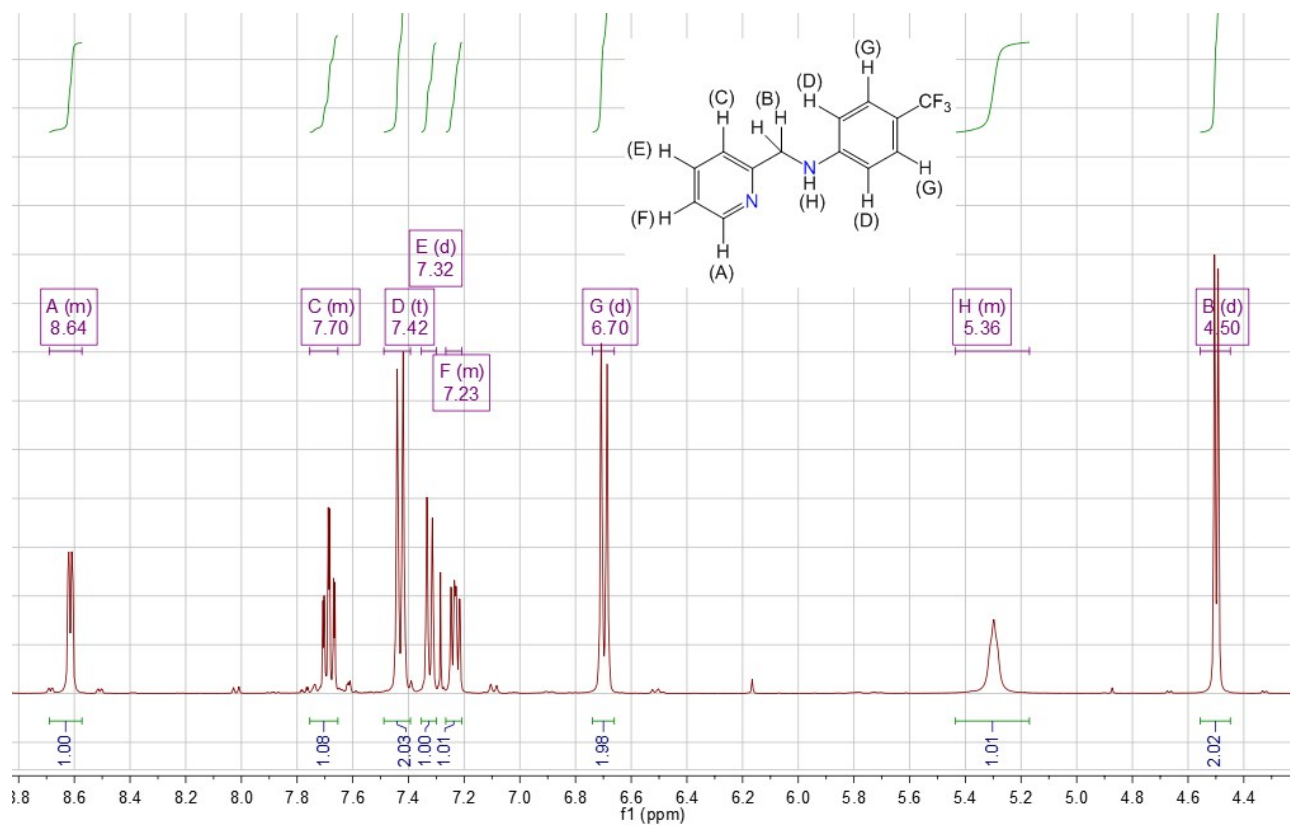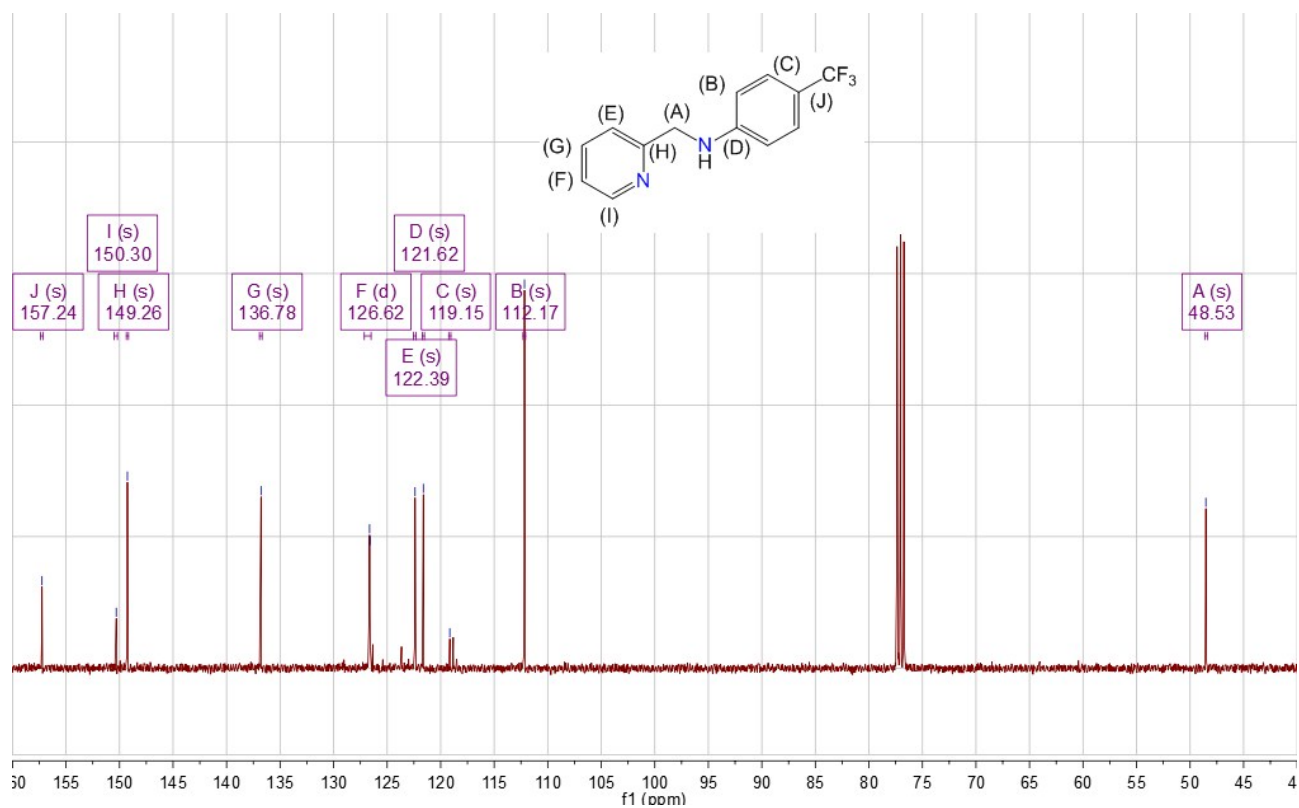

phenyl(4-((pyridin-2-ylmethyl)amino)phenyl)methanone

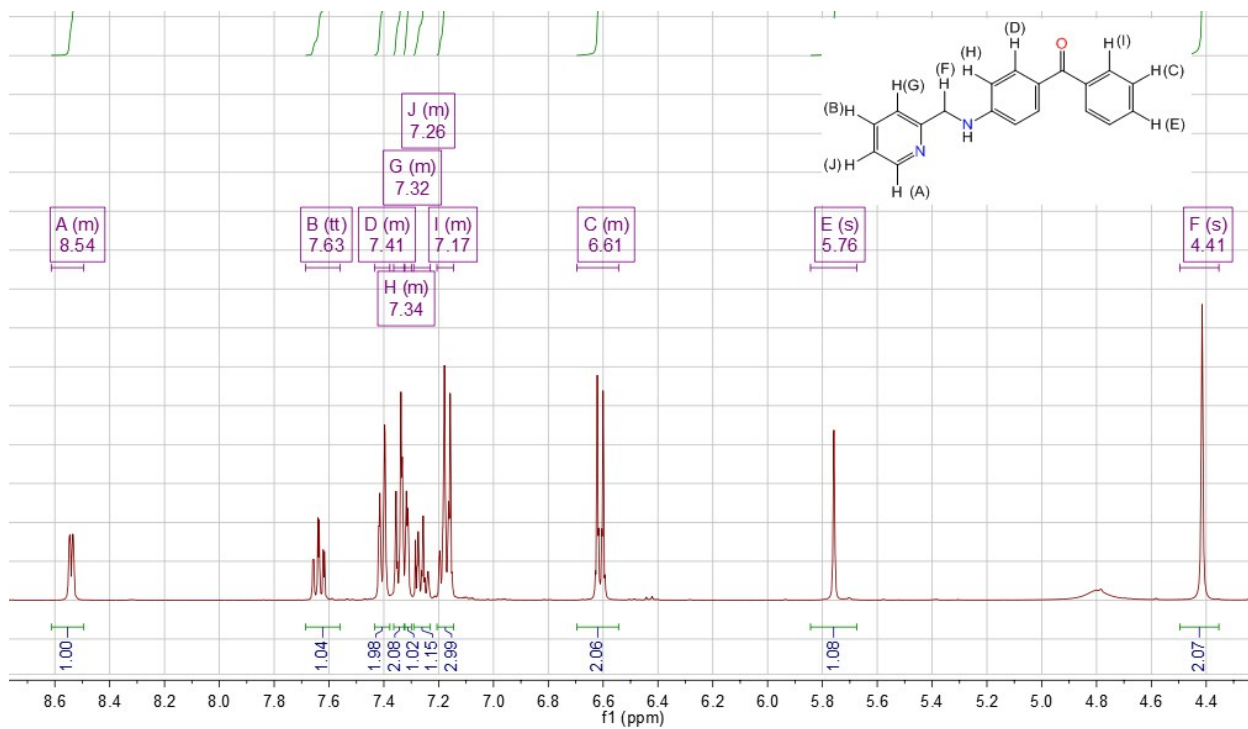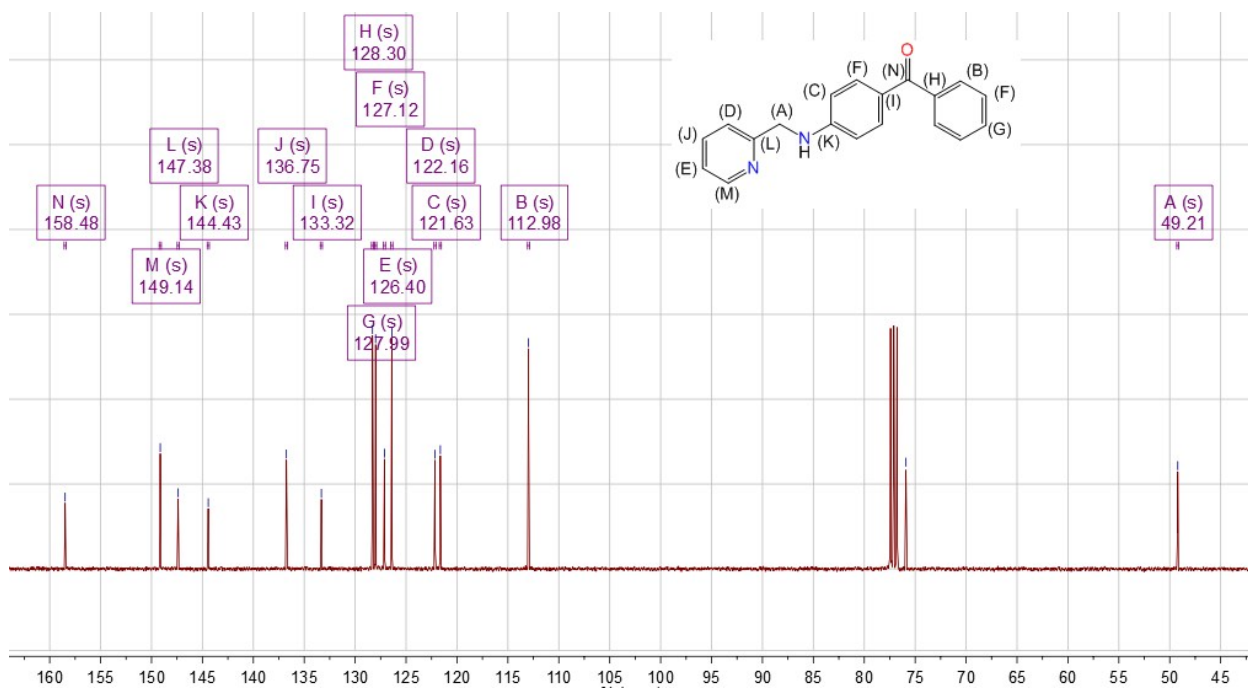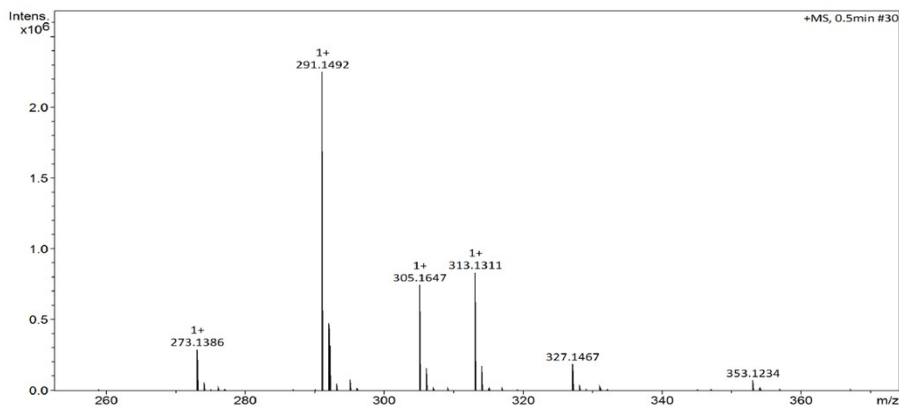

N-benzyl-1-(pyridin-2-yl)methanamine



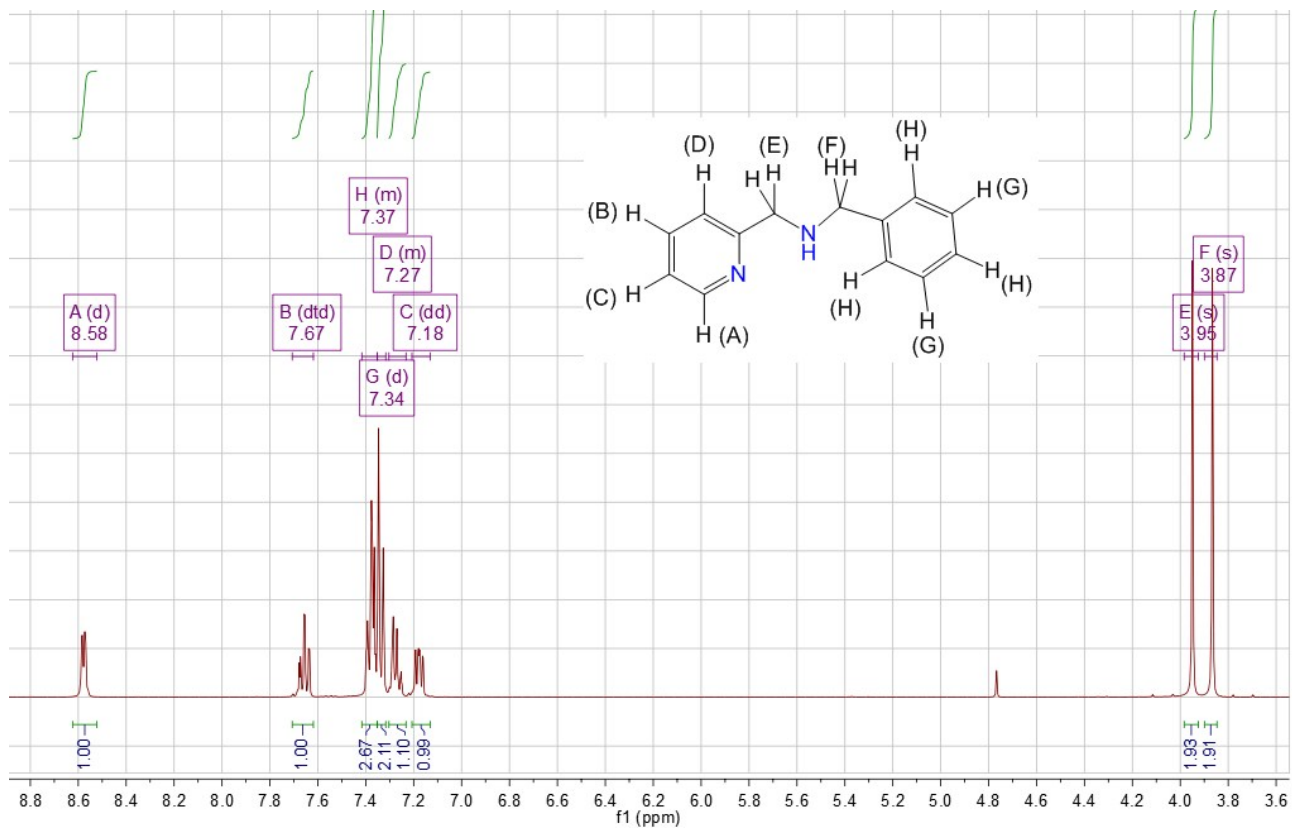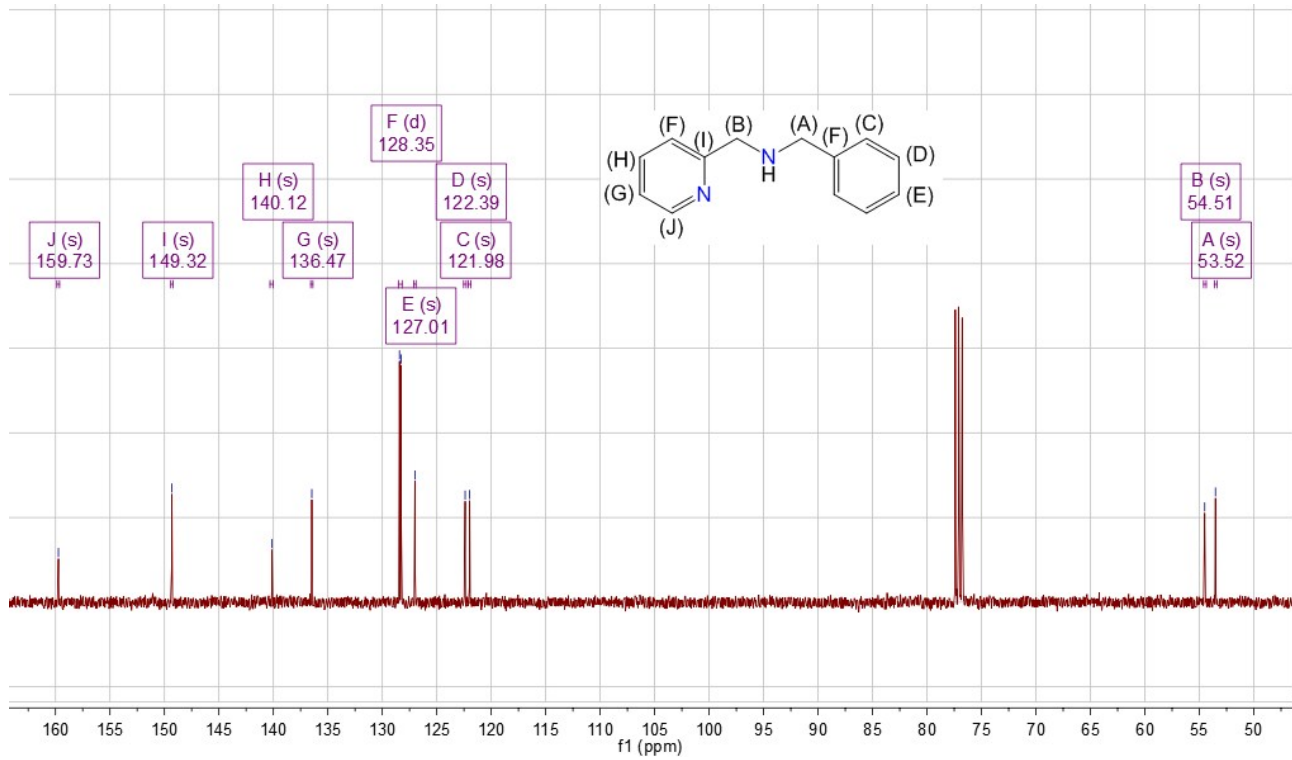

1, 4-methyl-N-((3-methyl-4-(2,2,2-trifluoroethoxy)pyridin-2-yl)methyl)aniline

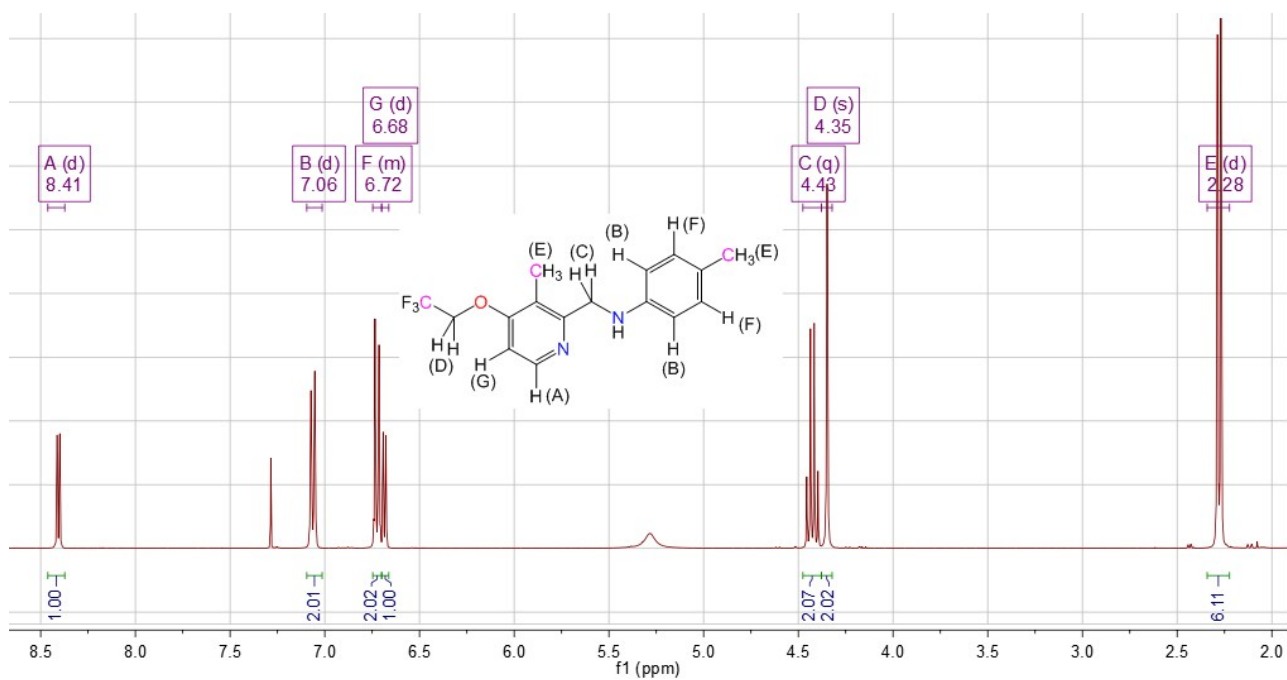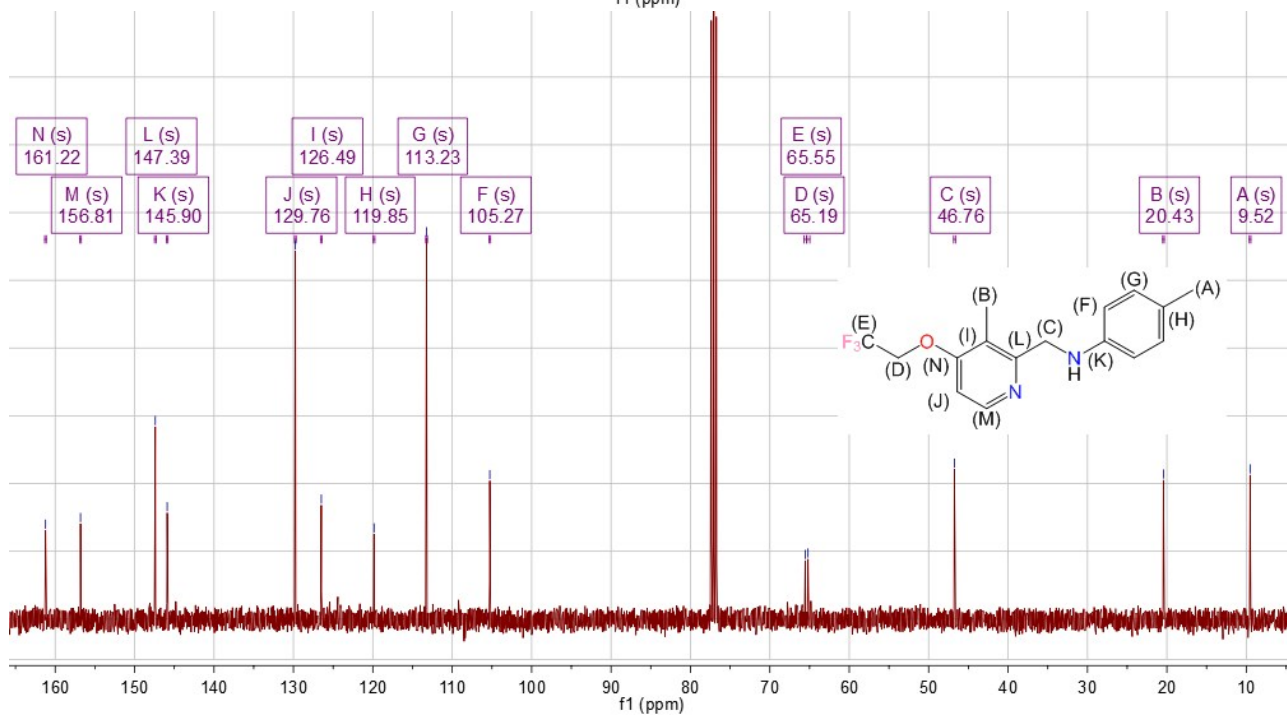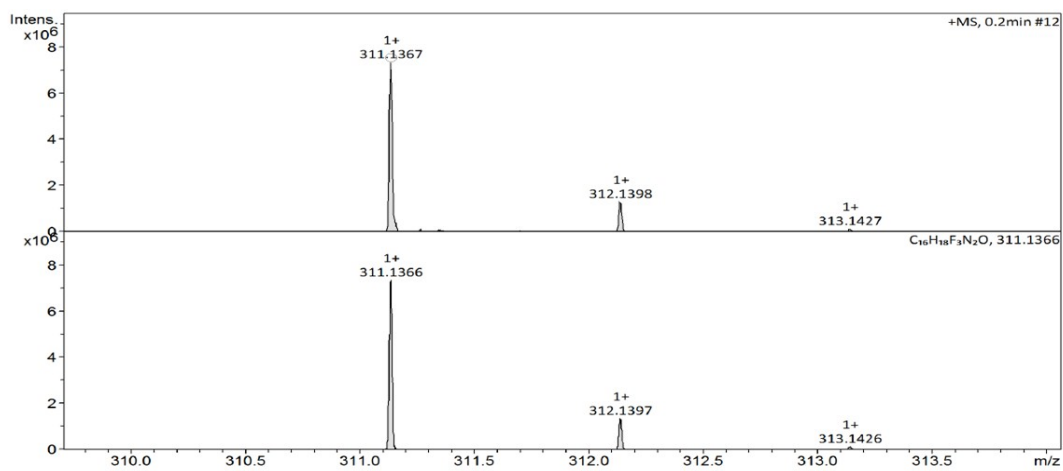

N-((4-(3-methoxypropoxy)-3-methylpyridin-2-yl)methyl)-4-methylaniline

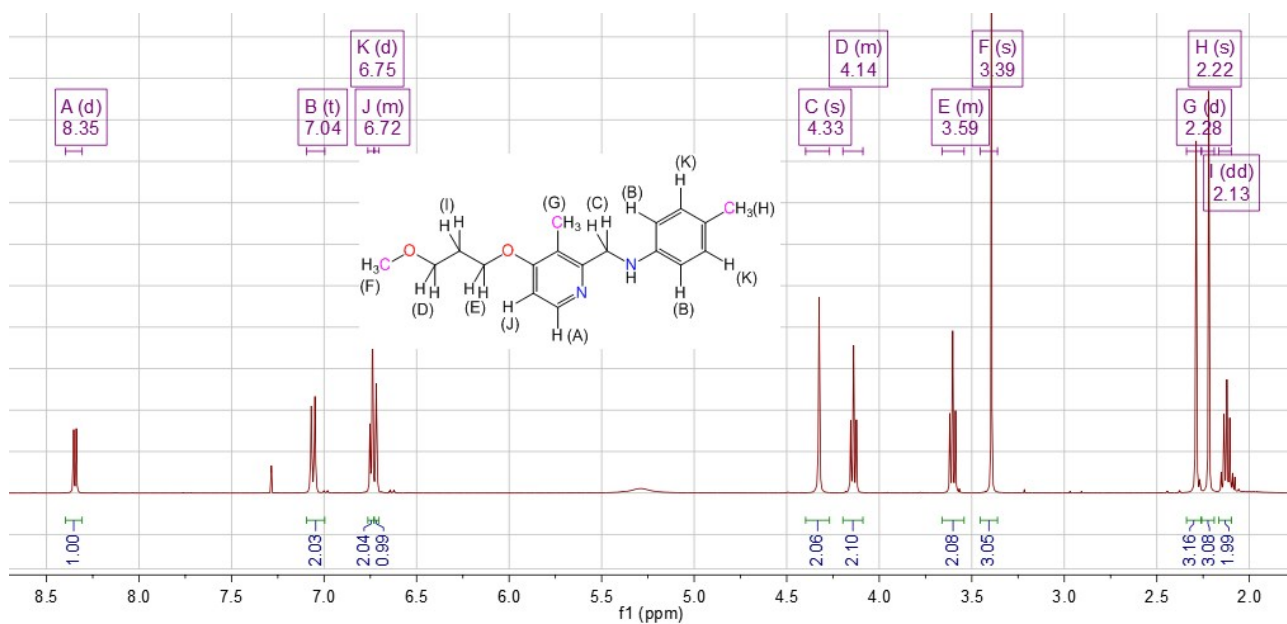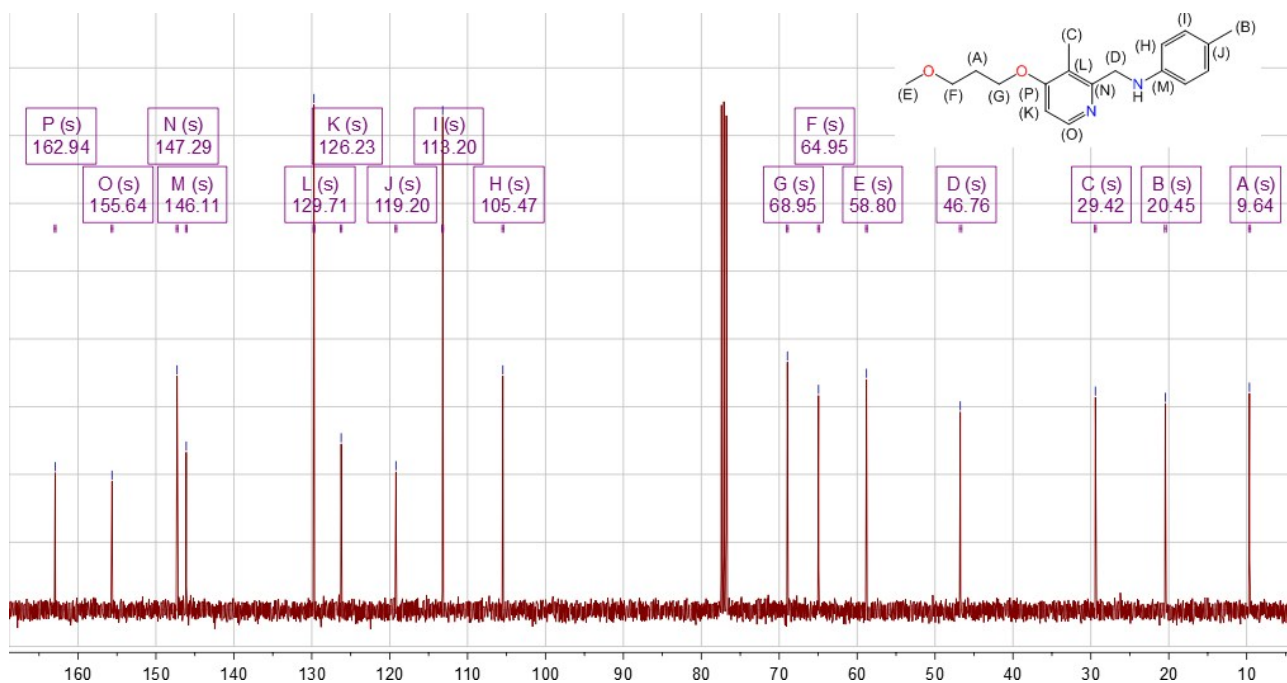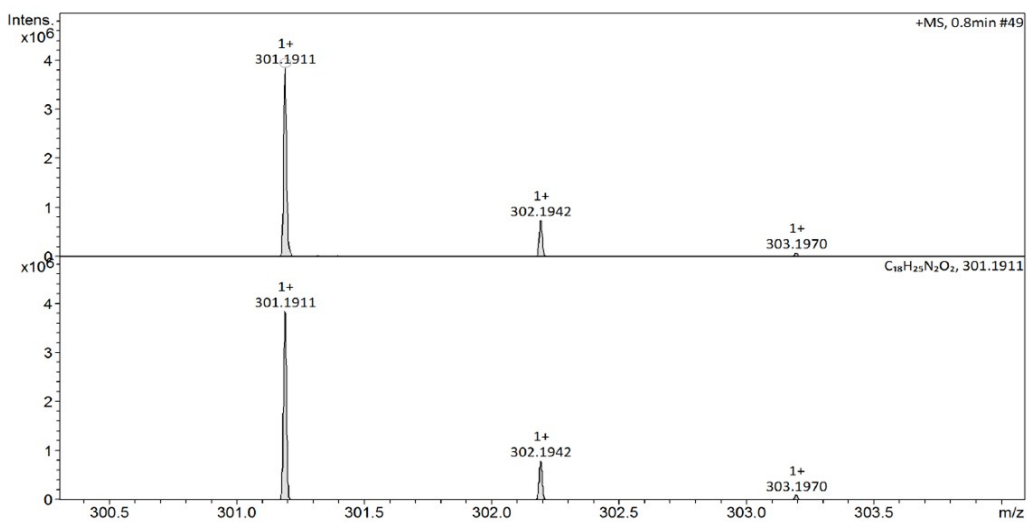

N-((4-methoxy-3,5-dimethylpyridin-2-yl)methyl)-4-methylaniline

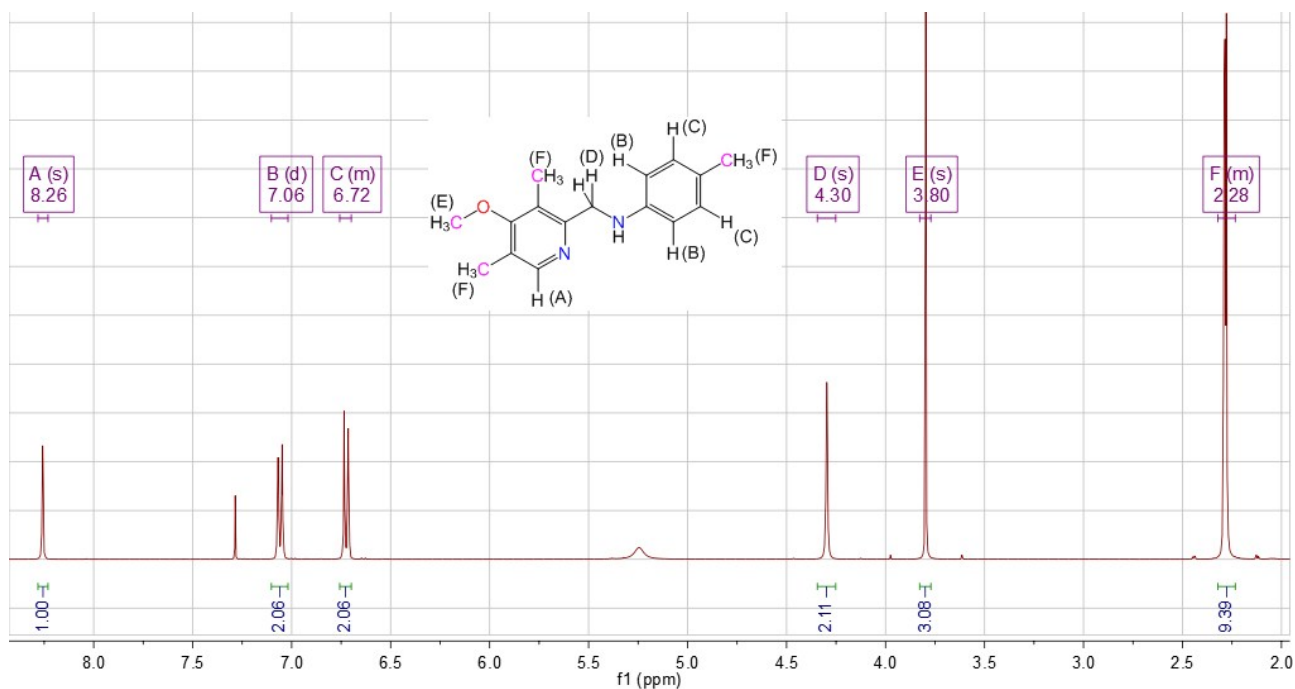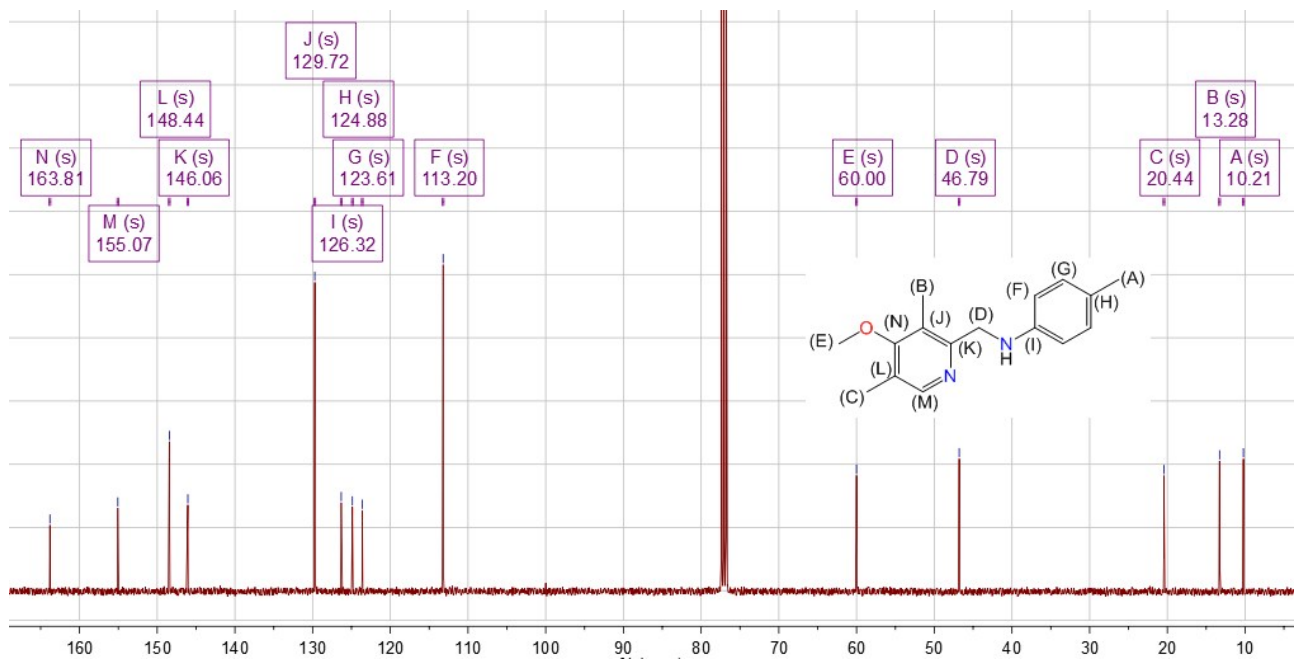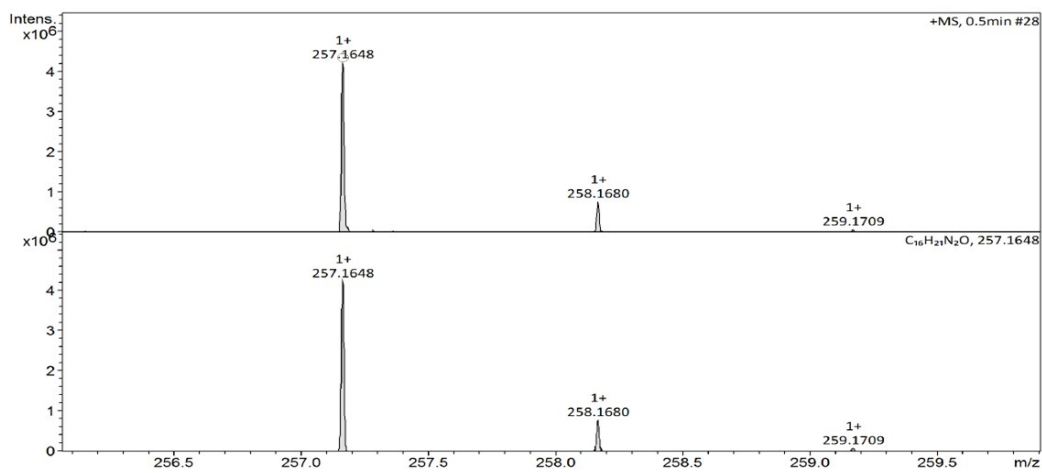

N-benzyl-N-(pyridin-2-ylmethyl)aniline

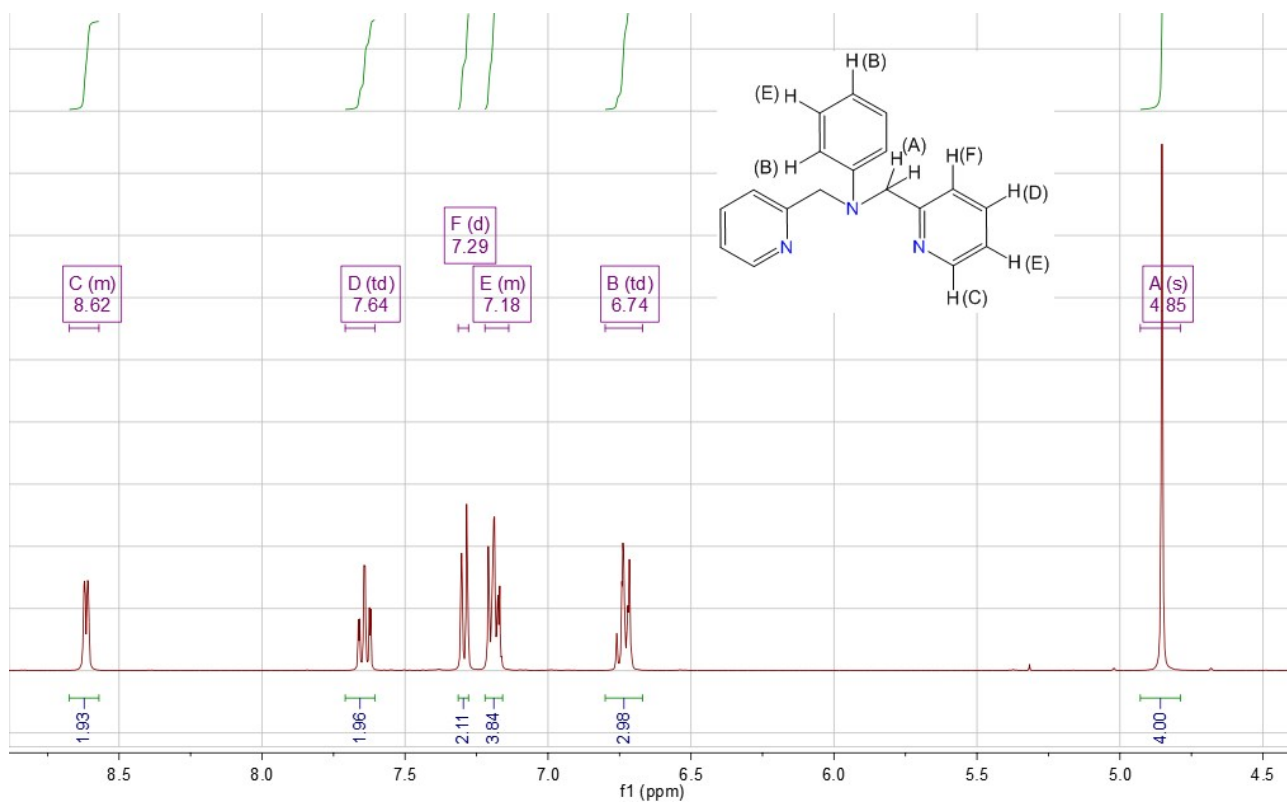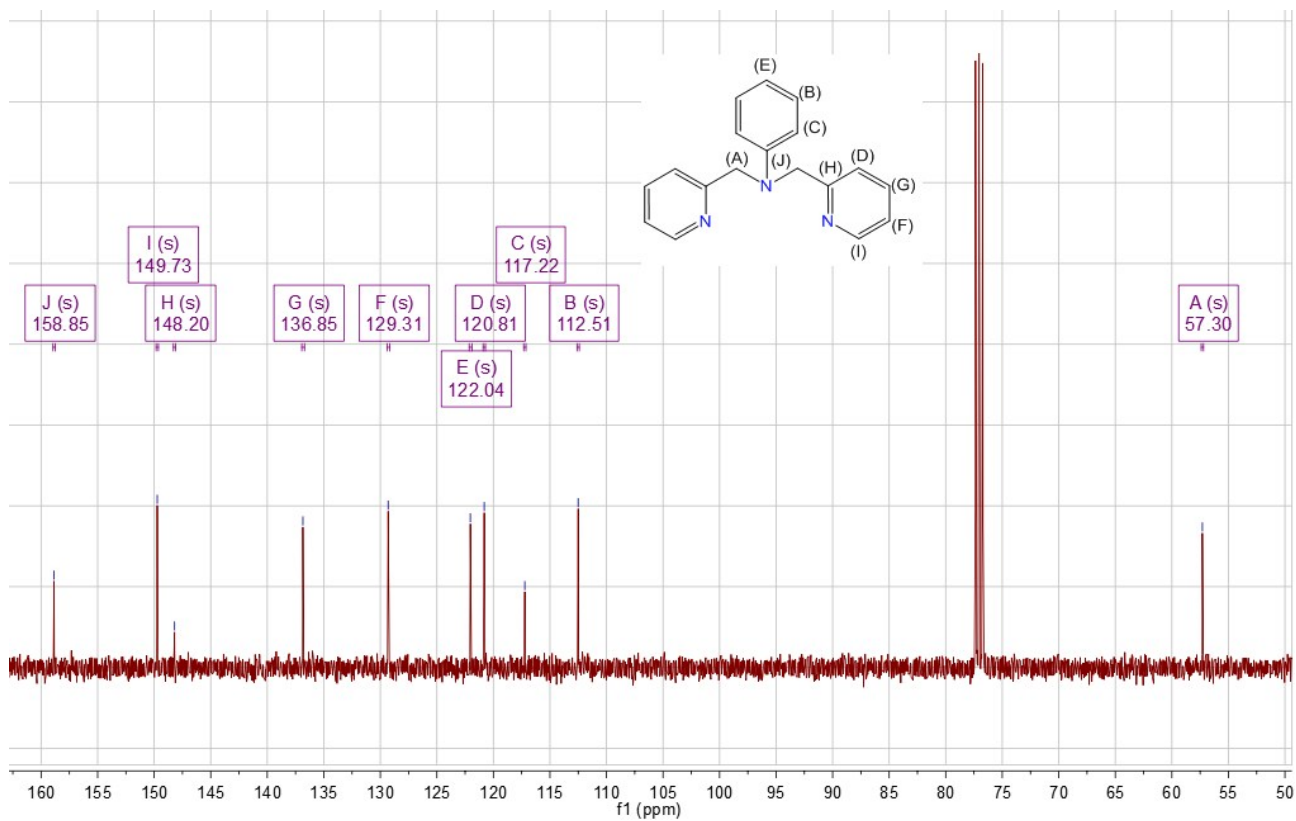

N-methyl-N-(pyridin-2-ylmethyl)aniline

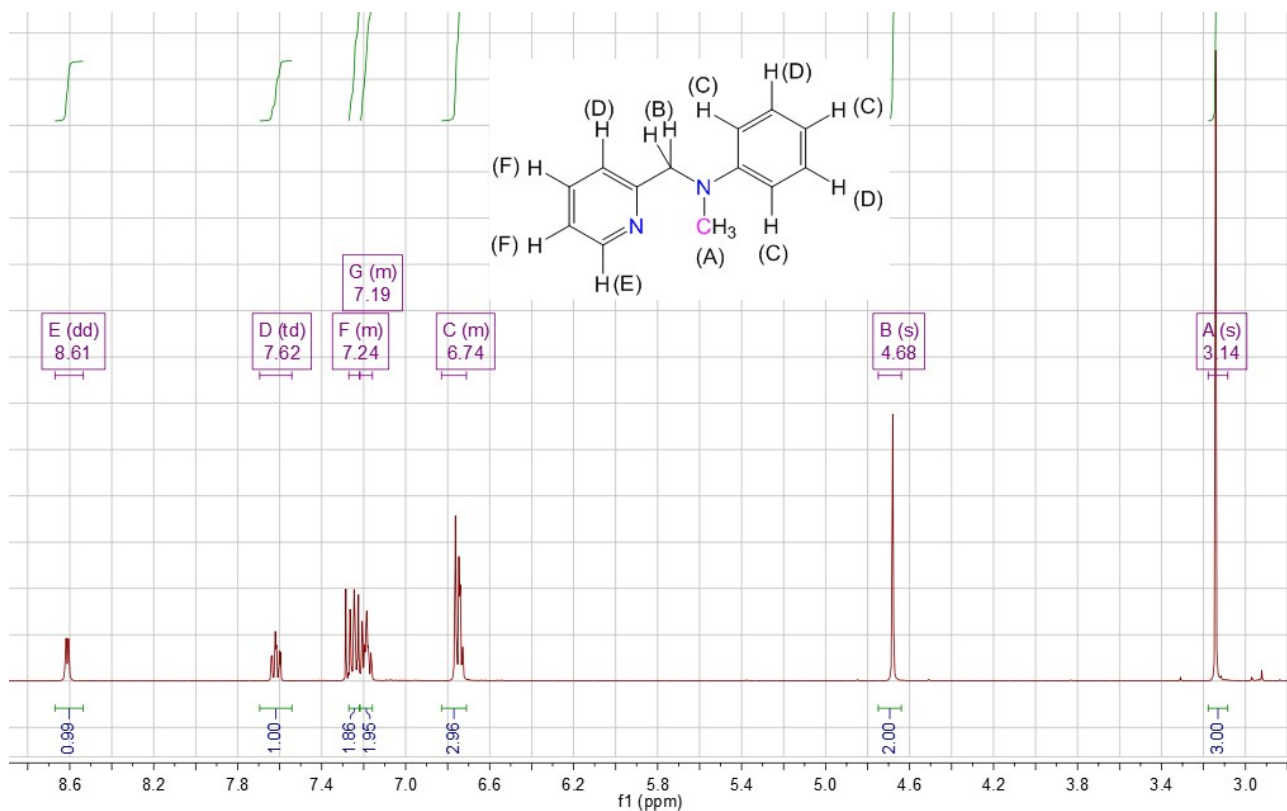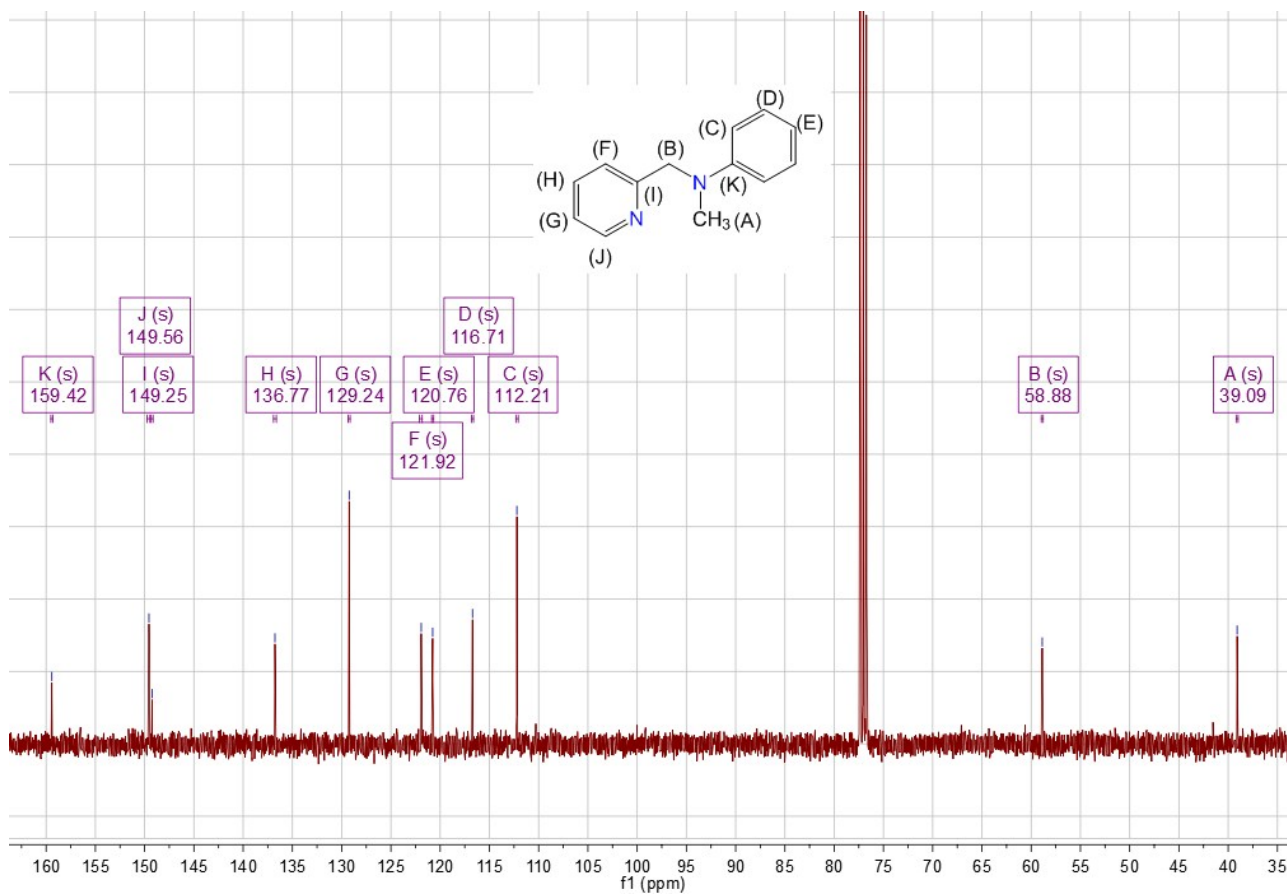

Supplement: c7ob02192e1.pdf [file c7ob02192e1.pdf]
